# Supplementary material for: A multi-omics study of the grapevine-downy mildew (Plasmopara viticola) pathosystem unveils a complex protein coding- and noncoding-based arms race during infection
Source: PubMed Central journal article supplement (PMC5768699; doi:10.1038/s41598-018-19158-8), 2018-01-15
Supplement: 41598_2018_19158_MOESM1_ESM.pdf [file 41598_2018_19158_MOESM1_ESM.pdf]

**A multi-omics study of the grapevine-downy mildew (*Plasmopara viticola*) pathosystem unveils a complex protein coding- and noncoding-based arms race during infection.**

Matteo Brilli<sup>1,2</sup>, Elisa Asquini<sup>1</sup>, Mirko Moser<sup>1</sup>, Pierluigi Bianchedi<sup>1</sup>, Michele Perazzolli<sup>1</sup>, Azeddine Si-Ammour<sup>1,\*</sup>

<sup>1</sup> Fondazione Edmund Mach, Via Mach 1, 38010, San Michele all'Adige (TN), Italy.

<sup>2</sup> Present address: Department of Agronomy, Food, Natural Resources, Animals and Environment (DAFNAE), University of Padova, Agripolis, V.le dell'Università, 16, 35020, Legnaro (PD), Italy.

\*Corresponding author: [azeddine.siammour@fmach.it](mailto:azeddine.siammour@fmach.it)

|                                     | Pages    |
|-------------------------------------|----------|
| - Supplementary note                | 1 to14   |
| - Supplementary figures (S1 to S36) | 15 to 50 |
| - Supplementary tables (S1 to S35)  | 51 to 70 |
| - Supplementary references          | 71       |

## Supplementary Note

### Preliminary assembly and sequence filtering

We obtained 164,574,481 100 nt long read pairs with average insert size of 234 bp as estimated post-assembly using samtools<sup>1</sup>. All reads mapping on the grape genome with a maximum of three mismatches were eliminated. We then removed 0.5% of reads and the remaining were used to build a preliminary *Plasmopara viticola* assembly using ABySS<sup>2</sup>. Several k-mer lengths were tested and the k=60 that, produced the best N50 (11kbp), was selected. This preliminary assembly (198Mbp) still likely contained sequences not coming from *P. viticola*, as suggested by the GC content distribution (**Supplementary Fig. S1**), which is clearly bimodal and the length of the assembly, since the estimated genome size is around 100Mb. To remove sequences not belonging to the *P. viticola* genome, we focused on scaffolds longer than 1,000 nucleotides and followed the flowchart indicated in **Supplementary Fig. S2** and consisting in:

- 1) Genes predictions were obtained using Augustus<sup>3</sup> after iterative training on *bona fide* and well predicted *Plasmopara* sequences, obtaining over 60,000 gene predictions.
- 2) Protein sequences were searched using BLAST against the non-redundant (nr) NCBI database and taxonomy information about the hits were recorded.
- 3) Each scaffold was assigned to one of several taxonomic categories depending on hits obtained by blastp. For instance, a scaffold with all hits belonging to Viridiplantae was assigned to the plant class, while one with hits towards Stramenopiles only was assigned to the putative *Plasmopara* class. Chimeric scaffolds were also found and those containing regions with homology to Stramenopiles were split by hand on the basis of the coverage profile over their length and the blastp alignments (e.g. **Supplementary Fig. S3**). A scaffold was considered chimeric when at least two non-overlapping and significant hits to different taxonomic groups were found.
- 4) Scaffolds with no homologies in the blastp analysis and scaffolds for which no gene predictions were retrieved using Augustus were analyzed using the same strategy as above but using blastn of the entire scaffold sequence against the nt database. The scaffolds with no homology to database sequences were tentatively assigned to the *P. viticola* assembly because they might represent sequences specific of this organism.
- 5) After this pipeline, we obtained a preliminary assembly containing 36,533 scaffolds larger than 1,000 bp and a total length of 110 Mb. The GC content distribution changed to unimodal, as expected for a single genome (**Supplementary Fig. S1**).

The original reads were then mapped on this preliminary assembly, likely containing most of the reads coming from *P. viticola*. Mapping reads were retained and used for a second assembly.

### Final Assembly

For the final assembly, we used Ray<sup>4</sup> and ABySS<sup>2</sup> with several k-mer lengths for a total of 17 runs. We hypothesized that our *P. viticola* inoculum could be composed of a pool of different haplotypes. In such case, reads coming from variable genomic regions can easily be considered as different genomic regions by the assembler, resulting in a high artificial

redundancy of the output assembly. The magnitude of the problem depends on how the assembler will consider slightly different sequences. We studied this issue by running an analysis whereby gene finding is performed on each of the 17 assemblies with the same parameters. Gene sequences from the same assembly were then clustered by sequence homology such that clusters contained sequences sharing at least 98% identity and no more than 5% length difference. The number of clusters is then compared to the original number of predicted genes to obtain a measure of the degree of redundancy in the assembly. We observed a very different behavior of the two genome assemblers. In particular, ABySS tends to build scaffolds that are much more redundant than Ray (**Supplementary Fig. S4**) probably because of the sensitivity to small differences in the reads.

Considering that we likely have a pool of haplotypes, we focused on Ray assemblies, which are less affected by the redundancy problem. It might be that ABySS is able to reconstruct more precise sequences, but in doing so it also assembles multiple times the same genomic region from different strains, inflating the genome size and the number of genes. Among the Ray assemblies, we selected R69 based on assembly statistics. In this way we were able to assemble 57,890 scaffolds. The level of fragmentation of the assembly may be caused by the short insert size coupled with potentially long repeat regions present in the genome (**Supplementary Fig. S5**). The coverage distribution (**Supplementary Fig. S6**) turned out to be multimodal, suggesting the presence of multiple haplotypes in the starting material.

## Gene finding and annotation

The *P. viticola* genome assembly was obtained in different steps since filtering of the input reads was necessary given the heterogeneous nature of the starting material. We trained parameters for the gene predictor Augustus<sup>3</sup> on the preliminary ABySS assembly (k=60) in the following way:

- 1) Unique core proteins from three *Phytophthora* species were selected following the analysis reported by Haas *et al.*<sup>5</sup> for a total of ~7,000 proteins.
- 2) These proteins were aligned to our assembly using Scipio<sup>6</sup>.
- 3) Scaffold regions corresponding to the most significant alignments (N=1,572) were extracted, translated in a suitable format and used for training the Augustus gene prediction model.
- 4) Predicted proteins were extracted and blasted against the *P. infestans* genome. Those with highly similar hits (>80% identity) and less than 10% difference in length (N=1,546) were retained for a second round of training.
- 5) The previous protein set was partitioned into train (N=1,046, 585 multiexonic) and test sets. The test set was further partitioned into mono- and multi-exonic (222 and 278 sequences, respectively) to test Augustus performances separately for the two classes of genes.
- 6) Augustus parameters were estimated from the training set and the performances were evaluated on the test set (**Supplementary Table S2**).
- 7) Gene prediction was run with the estimated parameters on the entire assembly giving ~60,900 genes.

Once the final assembly was obtained, Augustus was re-trained to improve the parameters over a set of *bona fide* sequences and taking advantage of i) homologies with sequences from other oomycetes and ii) RNA-Seq data of *P. viticola* sporangia and *P. viticola* infected plants. Intron and coding sequence (CDS) hints for Augustus were generated from

proteins using Exonerate software with default parameters<sup>7</sup>. RNA-Seq was used to produce intron hints running the *bam2hints* script available in Augustus, after aligning RNA-Seq reads using bowtie2 with no mismatches allowed in the seed region<sup>8</sup>.

The procedure undertaken was the following:

- 1) Starting from the parameters obtained on the preliminary assembly, we ran Augustus over the new assembly including intron and CDS hints from protein and RNA-Seq alignments. Gene predictions were extracted and their protein sequences were blasted against a database of 12 oomycetes (*Pythium*, *Hyaloperonospora* and *Phytophthora* species). The blast was filtered by e-value (maximum 0.0001) and on the basis of i) alignment coverage of the query by the first blast alignment (minimum 90%) and ii) a maximum 5% difference in length between the predicted protein and the first blast hit. We obtained 2,853 gene predictions for training Augustus.
- 2) The sequences obtained as described above were partitioned into a training (2,091 gene predictions of which 1,172 are multi-exonic) and a test (762 gene predictions of which 402 multi-exonic) set.
- 3) Parameters of the Augustus gene model were estimated using the above training set (performances on the test set are indicated in **Supplementary Table S2**).
- 4) Parameters were re-trained using the whole (train+test) dataset.
- 5) Augustus was run on the final assembly using hints from RNA-Seq and protein sequences as in the first step to obtain the final set of Augustus gene predictions.

GlimmerHMM<sup>9</sup> was trained using trainGlimmerHMM on the entire set of predictions (2,853 sequences) used for Augustus, and returned 24,641 predictions.

GeneID<sup>10</sup> was run exploiting available parameters for *P. infestans* (<http://genome.crg.es/software/geneid/>). This program returned a large fraction of very small gene predictions with respect to the others (**Supplementary Fig. S10**).

As different gene finders employ different algorithms and often rely on different gene models, we integrated three of them to improve the genome annotation (Augustus<sup>3</sup>, GlimmerHMM<sup>9</sup> and geneID<sup>10</sup>). The final gene predictions were obtained by combining information coming from available oomycete proteins and from our own RNA-seq data.

After filtering out proteins shorter than 30 amino acids, we obtained 38,284 gene predictions corresponding to 38,298 proteins for the presence of some alternative transcripts, and that represents our draft *P. viticola* proteome. Of these, 14,792 are supported by both homology with other Oomycete proteins (20,354 supported gene predictions) and reads from RNA-seq (18,335 supported gene predictions), therefore we estimate the size of the proteome to be in line with *P. halstedii*, around 20,000 proteins. KAAS<sup>11</sup> and Argot2<sup>12,13</sup> were used together with extensive blast analysis against available databases to provide functional classification of the predicted proteins. Ortholog classification of the predicted *P. viticola* proteins was made using Inparanoid<sup>14</sup> followed by QuickParanoid (<http://pl.postech.ac.kr/QuickParanoid/>). Using this strategy we obtained the *pan-genome* phylogenetic profile matrix for 15 Oomycetes.

## Merging protein coding gene predictions

The three gene prediction programs that we used are all based on different algorithms and therefore generate different predictions. Nevertheless, the overlapping between the outputs is generally high and in this situation a selection of the predicted sequences that

overlap significantly was necessary. Gene prediction mergers are available, but tend to re-estimate the parameters, while we need to select one sequence per locus, and selection has to be made on the basis of some objective quantity, preferably related to the quality of the gene prediction. For that task we implemented a strategy that takes into account (i) evolutionary information in the form of alignments with available oomycete proteins, and (ii) organism specific information in the form of alignments *de novo* transcripts built from RNA-Seq data produced in this work. The strategy used was the following and it is available as a java program upon request:

- 1) All predicted proteins were searched using BLAST against:
  - a) a database of oomycete proteins. These alignments were used to assign to each protein an “evolutionary” score, calculated as:  $S_{Evo} = \frac{(L_{ali}-g) \times L_{ali}}{L_q \times L_{fbh}}$ , where L stands for length and the subscripts *ali*, *q* and *fbh* indicate the alignment, the query and the first BLAST hit, respectively. *g* indicates the number of gaps in the BLAST alignment. Alignments used for calculating the score are only those with e-value smaller than  $e^{-5}$ . The evolutionary score therefore approaches 0 in case of short alignment length or small coverage of the first BLAST hit, while it is 1 when the alignment of the two sequences cover their entire length. The score can be seen as a measure of how close in terms of length (and therefore also gene structure, i.e. intron/exons) is the predicted protein with respect to the most similar protein from other oomycetes.
  - b) the set of *de novo* transcripts was built using Cufflinks<sup>15</sup>. The alignments with transcripts were used to calculate an “expression” score  $S_{Exp}$  with the same formula used for the evolutionary score.
- 2) The evolutionary and expression scores were integrated as  $S = \frac{(1+S_{Evo}) \times (1+S_{Exp}) - 1}{3}$ , such that S ranges from 0 to 1. This score will be used as the basis for selecting the “best” prediction when multiple of them overlap.
- 3) Predictions coordinates were used to build a graph where each prediction was a node, and edges connect predictions that were on the same strand and that overlap for more than 25% of their length (calculated on the shortest prediction). Connected components in this overlap graph correspond to (partially) overlapping gene predictions and we wanted to extract the best one on the basis of the above score.
- 4) Each connected component in the overlap graph was processed using an iterative procedure as it follows:
  - a) To get the node with highest degree in a cluster (i.e. the gene prediction that is overlapped with the largest number of gene predictions), let’s call it A;
  - b) To check the score of its first neighbors (nodes connected to A): if A’s score is smaller of at least one of the neighbors scores, remove A from the graph; if A’s score is the maximum among its neighbors, remove all of them;
  - c) If the cluster still exists or it is split into two or more smaller clusters, repeat from (a) for the remaining clusters. Else if only one node remains from the cluster or if all the nodes previously belonging to the cluster are now isolated, move to the next cluster.

At the end of this procedure, we obtained a list of gene predictions that were considered the best within an overlapping cluster, on the basis of the integrated score taking into account evolutionary and expression information. In case of alternative and overlapping transcripts, we ended up with the transcript better conforming to other proteins in the oomycetes and/or to the transcript that has been assembled from RNA-Seq data. Non

overlapping alternative transcripts were treated as if they were independent gene predictions but remains associated to their original parent gene and therefore it can happen that more than one transcript for the same gene was present in the final selected predictions.

## Naming conventions

All gene predictions have been named by adding the suffix *PVITvX* to a progressive number. *PVITvX\_T* followed by the parent gene progressive number indicates the gene transcript. If multiple transcripts for the same gene have been selected, the additional transcripts have .1 (.2 and so on) appended to the transcript ID. CDSs have been named accordingly as *PVITvX\_CDS* plus the progressive number of the parent transcript for a final set of 38,298 genes (**Supplementary Table 3**).

## Ribosomal and transfer RNA genes

Ribosomal genes (rRNA) were annotated using RNAmmer<sup>16</sup>, using the eukaryotic model and all remaining parameters as default. We were able to find a gene for the 5S rRNA on scaffold-25542 and a gene coding for the 28S rRNA on scaffold-7390 (**Supplementary Table S4**). Both sequences retrieved as first blast hit a gene from the oomycetes with more than 95% identity (**Supplementary Table S5**). Transfer RNA genes (tRNA) genes were identified with tRNA-scanSE<sup>17</sup> with default settings (**Supplementary Table S6**). We found at least one tRNA for every amino acid, in addition to one selenocystein and two suppressor tRNAs. We also found 64 pseudo-tRNA genes.

## Estimation of the degree of completeness of the assembly

To measure the degree of completeness of our genome assembly, we considered four different tests:

1. The total size of the assembly is ~83 Mb and estimations of *P. viticola* genome size using Feulgen staining<sup>18</sup> indicate a size of ~110 Mb; therefore, our genome assembly should account for about 75% of the total genome size.
2. After ortholog classification, we estimated the oomycete core genome excluding *P. viticola* to be composed of 1,299 genes among the sequenced oomycete species of which 1,054 also contain *P. viticola* sequences; therefore, the “coding” assembly should be ~81% complete. A similar conclusion was reached when testing the degree of reduction of the size of the core genome when adding the biotrophs in our dataset (**Supplementary Fig. S11**). *P. halstedii*, representing the most deeply sequenced genome among the biotrophs, misses more or less 15% of the genes that are in the core genome of the non-biotrophs. This can be considered as a first approximation as the reduction caused by the biotrophic life style. Since adding *P. viticola* determines a reduction of 30-35% of the core genome, the assembly should be estimated at ~80%.
3. We downloaded all *P. viticola* sequences available in the NCBI nucleotide database (N=726) and clustered them by homology to get a non-redundant dataset (N=288) and blasted them against our genome assembly to detect their presence. At 95% identity level cut-off, we obtained a hit for 228 sequences, corresponding to ~84% of the total.

4. We performed a BUSCO<sup>19</sup> analysis to assess the completeness (**Supplementary Table S9**). We obtained 73% complete BUSCO orthologs while this percentage is much higher (over 93%) for *P. halstedii* and *P. infestans*. Most of them are single copy, and the duplicated percentage of our assembly is well in line with the *P. halstedii*'s one, while the *P. infestans* BUSCO orthologs are duplicated in almost 7% of the cases. When summing up the complete and fragmented BUSCO orthologs our assembly covers 87.3% of the 303 sequences.

All the tests performed seem to indicate that our genome assembly is about 75% to 87.2% complete taking into account the genome size.

We also performed an estimation of the true protein number in *P. viticola* (**Supplementary Fig. S12**). We studied the relationship among the number of proteins in the proteome and the number of proteins that we assigned to an ortholog group, and found it to be almost linear. Therefore, we built a regression model excluding *P. viticola* from the analysis and we then used the model parameters to predict the total number of proteins in this organism. By approximating the degree of completeness of our genome to 80%, we obtained a 95% probable estimate in the range 12,952-19,330 proteins, which is in agreement with the 18,335 sequences for which we detect gene expression in our RNA-Seq libraries.

## Ortholog classification and oomycete core genome

We identified ortholog groups from 15 oomycete species including *P. viticola* (**Supplementary Table S7**). The comparisons of pairs of genomes were performed using Inparanoid<sup>20</sup>, and the pairwise outputs were integrated with QuickParanoid (<http://pl.postech.ac.kr/QuickParanoid/>). We obtained 16,517 ortholog clusters and among them 6,124 that are present in at least 10 species. *P. viticola* proteins fall in 6,552 clusters, for a total of 10,133 proteins. As a comparison, *Plasmopara halstedii* proteins are found in 7,003 ortholog groups, for a total of 9,233 proteins. The oomycete core genome is formed by genes shared by the 15 oomycete species included in the analysis and is partitioned into 1,054 groups for a total of 50,018 proteins (3,238 from *P. viticola*). Of these, 312 contained exactly one protein per species and were used for phylogenetic analysis. The size of the core genome is quite small because the organisms used to obtain it are phylogenetically very diverse; they all belong to the oomycetes, but they are spread over two orders, Pythiales (*Pythium spp.*) and Peronosporales. The Peronosporales in our dataset are moreover from different families: Peronosporaceae (*P. viticola* and *H. arabidopsidis*) and the *Phytophthora* genus (which is not assigned to any Family). The core genome calculated with *Phytophthora* genomes only is consistently larger, comprising 4,530 ortholog groups. The KEGG annotation of *P. viticola* was used to get the most represented categories in the core genome (**Supplementary Table S8**). The distribution of the size of each ortholog cluster suggests the existence of two large families of protein clusters, the first comprising proteins belonging to clusters with approximately less than ten proteins (i.e. the accessory genome), and the second one represented by groups with 15 proteins in average, therefore containing the core genes, in addition to most of the remaining housekeeping genes and expanded gene families (**Supplementary Fig. S13**). The presence/absence profile analysis provides support for the topology of the phylogenetic tree obtained using ML methods over an alignment produced by concatenating the 312 proteins found to be present in single copy in all analyzed genomes.

## Phylogenetic analyses

Phylogenetic analyses of the oomycete dataset were performed taking advantage of 312 core ortholog groups containing a single protein per genome. We selected these proteins because core proteins that are present in a single copy are less prone to errors in ortholog assignments that might negatively affect the phylogenetic reconstruction. Once the 312 proteins were concatenated, they were aligned using MAFFT<sup>21</sup> using parameters optimized for very long sequences. We obtained an alignment of more than 202,000 positions. This alignment was filtered with Gblocks<sup>22</sup>, since it has been shown that removing divergent and ambiguously aligned regions from alignments considerably improve phylogenetic reconstructions<sup>23</sup>. The filtered alignment still had 78,868 aligned positions 48% of which are perfectly conserved in all of the species under analysis and the remaining are partitioned into 27,340 patterns. Phylogenetic trees were built using PhyML<sup>24</sup> and RAxML<sup>25</sup>. PhyML and RAxML returned identical topologies with slightly different bootstrap values and branch lengths (**Supplementary Fig. S14**). The topology obtained was in agreement with the one reported in Sharma *et al.*<sup>26</sup> and McCarthy *et al.*<sup>27</sup> suggesting that taxonomical refinement of the oomycetes might be necessary because the molecular information obtained during the last studies strongly suggests that *Plasmopara* should be placed within the *Phytophthora* clade. This is also supported by full-proteome comparisons, indicating that the distributions of identity percentage of the first blast hit are not very different for *Phytophthora-Phytophthora*, *Plasmopara-Plasmopara* or *Plasmopara-Phytophthora* comparisons (**Supplementary Fig. S15**).

## Comparative genomics of effector proteins

We grouped the RxLR effectors into RxLR and RxLR-like families. Proteins that possess the distinctive RxLR motif (defined as a match to the motif R[A-Z]LR) within 60 amino acids from a signal peptide cleavage site (SP) and those missing the SP but having the RxLR occurrence and the additional and characteristic motif EER (defined by the regular expression [ED][ED][RK]) within 150 amino acids are grouped in the RxLR family (**Supplementary Fig. S16**).

We opted for this rule because gene predictions can be partial and could therefore miss the N-terminal where the SP is located (**Supplementary Fig. S17**). To further reduce the false positives, we calculated the probability of each RxLR occurrence by shuffling the protein sequence for 2,000 times and counting the number of times that an RxLR was found. Only motifs with a probability smaller than 0.05 in the shuffled sequences were further considered (**Supplementary Table S10**). Code for performing this analysis is available upon request.

However, we might expect that the RxLR motif is slightly different in different oomycete groups (**Supplementary Fig. S18**). *Pseudoperonospora cubensis* for instance has effectors with homology to *P. infestans* RxLR effectors that carry a QxLR motif. These proteins resulted to be localized in the host plant nucleus, strongly pointing towards a role in pathogenesis<sup>28</sup>. Similarly, *Albugo candida* has experimentally verified effectors with a RXL[KQ] motif, while in *Pythium* species the RxLR motif is considered to be absent<sup>29</sup>. For this reason, we also considered and included alternative RxLR motifs in our study.

We classified as RxLR-like the effectors that share homology to RxLR proteins identified through regular expression matching. As *bait*s for retrieving homologs, we used the proteins with secretion signal + RxLR motif within 60 residues (+EER motif within 150), together with those with secretion signal and RxLR or RxLR and EER within 150 residues, for a total of 1,100 proteins, coming from all oomycetes considered in this work. These



were blasted against the oomycete database using blastp. The blast output was filtered and only alignments with an e-value  $\leq e^{-5}$  and  $\text{id}^*\text{qcovs} \geq 5,000$  were retained. The latter threshold allows using both the information coming from the difference in length among query and subject, and the homology. All the 15,876 oomycetes proteins retrieved in such way were then blasted all-against-all. The output was filtered and parsed to prepare it as an input to the MCL algorithm to detect RxLR communities using as edge weights  $-\log_{10}(\text{e-value})$ . The e-value was replaced by  $e^{-200}$  when equal to 0 to avoid taking the logarithm of zero. After filtering at e-value  $\leq 0.01$ , the blast graph still contained 15,646 proteins. The MCL algorithm was run multiple times, using increasing inflation parameter values. Since this parameter controls the granularity of the resulting clustering, scanning a range of values allows exploring the cluster structure of the homology graph more in detail. When running the MCL with an inflation parameter of 2, 2.5, 3 and 4, we obtained 555, 630, 696 and 764 RxLR clusters respectively, indicating a wide diversification of this gene family in oomycetes.

We analyzed the MCL output in terms of the presence of i) signal peptide and ii) canonical and alternative RxLR motifs using an extended regular expression ( $[\text{QRK}]\text{xL}[\text{KR}]$ ) together with relaxed rules for the distance from the signal peptide. Since all “rules” for RxLR identification are based on the features of a few *Phytophthora* genomes, the identification of these effectors in other genera/families might require relaxed constraints. On the opposite, it is known that RxLR motifs are combined to a wide range of protein domains that are found in non-effector proteins; therefore, we had to be cautious with the retrieval of homologous proteins that likely contains false positive effectors simply sharing a domain with effectors. For this reason, we only focused on the RxLR-like characterized by the presence of canonical or alternative RxLR sequence motifs. The association of the RxLR motif (or variants thereof) with known protein domains, was explored by building a co-occurrence graph of Pfam domains with the RxLR signature (**Supplementary Fig. S19**). We selected *P. viticola* RxLR-like effectors as those proteins still in a multi-protein cluster at the most stringent clustering ( $I=4$ ), for a total of 802 proteins (gene set called *RxLR-like All*). Of these, 40 also have a predicted signal peptide for secretion together with one (22 sequences) or more occurrences of the RxLR (variant) together with an EER occurrence within 150 residues (gene set called *RxLR-like Motifs*). We also found that 193 proteins in the *RxLR-like All* set are positive to signal peptide prediction, corresponding to a 5.7 fold enrichment with respect to the total proteome ( $p\text{-value}=0.0$ ).

Crinkler (CRN) proteins have been defined on the basis of the presence of characteristic motifs, whose function is, however, still unknown. The well-known LFLAK signature as identified by meme on 430 CRN sequences from Haas *et al.*<sup>5</sup> is considered to be a hallmark of this family of effectors. Presence of the LFLAK motif (from residue 50 in **Supplementary Fig. S20a**) has been previously used for the identification of Crinklers in *Phytophthora* species<sup>5</sup>. However, this motif is conserved when considering *Phytophthora* species but not when including more sequences and other organisms<sup>5</sup>. Certain variability exists also within the LFLAK motif of previously annotated *Phytophthora* Crinklers. Therefore, when additional species are considered, we can expect an increased variability of the signature also in this case. In addition to the LFLAK, other sequence motifs can be present in Crinkler proteins, such as the so-called VVP motif (**Supplementary Fig. S20b**), which is usually localized downstream of the former. In Haas *et al.*<sup>5</sup> CRN proteins were classified by building a PSI-blast profile and an HMM from only 16 previously identified CRNs. However, the small number of proteins used for training might give a model over fitted on those sequences. This would be a problem if the constraints governing the evolution of a distinctive motif might change depending on the species considered; as in the case of RxLR effectors, this can be expected given the phylogenetic distance among

some of the organisms considered in this work. Since our dataset comprised several non-*Phytophthora* species, we tried to improve the CRN identification strategy: we tried to align the 430 CRN sequences identified in Haas *et al.*<sup>5</sup> to build a more general HMM model, but the alignments were of very low quality, making the building of a meaningful HMM impossible using the full sequences. We decided therefore to use the information contained in shared sequence motifs and their combination to implement an alternative classification strategy not requiring the global alignment of all the sequences. Since we have seen that the LFLAK motif, probably the most conserved one, has itself some inherent variability, we speculated that maybe a correct classification of these proteins might come from integrating profiles of presence and absence of several sequence motifs instead of focusing on only one or two of them by assuming they are universal. Variability of the motifs has moreover to be modeled in a more satisfactory way than with regular expressions, where the alternatives at some position all have the same weight. We decided to let MEME discover conserved motifs in a dataset of *bona fide* CRN proteins and then we used them to identify novel CRNs. MEME was run on the whole dataset of *P. infestans* CRN proteins asking for 10 motifs of 30 residues (-mod zoops, allowing for zero or one motif per sequence). MEME was able to find 9 motifs. The motifs are encoded as log probability matrices, where each ij cell indicates the probability of finding residue j at position i of the sequence motif. We used these 9 motif models to scan all oomycetes proteomes using a sliding window approach where we consider each position of a window as evolving independently from the remaining such that the score of each window is the sum of the log probabilities at each position in the model. The score of a sequence is then the maximum score over all the windows. We calculated two matrices of motif probabilities, one for *bona fide* CRN proteins, and the other for 17,700 *P. infestans* proteins to be used as negative cases (the Crinklers still present in this dataset are a small fraction of the total and should not affect the training procedure). Once the score matrices are ready, we train a Support Vector Machine in Matlab to provide the classification. SVM models require training on a positive dataset. We therefore selected the 200 best scoring CRN sequences. The best performances were obtained when the input matrices were re-scaled to the range [0 1] and then log10 transformed. Cross-validation with an equal number of randomly sampled negative cases allowed to estimate the error rate of the model. For 100 times we built a different negative dataset by randomly sampling the 17,700 negative sequences, and we trained the SVM model, testing its performances by cross-validation. The error was estimated each time using 100 repetitions where 70% of the data (35% from the positive and 35% from the negative dataset) was used for training and the remaining 30% for validation. At each run of the procedure, the data was sampled randomly from the positive and negative dataset. The SVM models achieved a cross-validation average error of 0.0095, indicating that wrong classifications occurs in less than 1 case in 100 (**Supplementary Fig. S21**). The model predicted 13 additional CRN proteins from the negative dataset, 8 of which are indeed annotated as Crinklers but were not included in the CRN dataset from Haas *et al.*<sup>5</sup>. The same procedure was run with probability matrices corresponding to different MEME runs to identify the best motif length for classification. We tested motif widths of 5, 10, 15 and 30. The SVM classifier using the latter data showed the best performances and was selected for further analysis on all oomycetes that were considered in this work. Since Crinklers are secreted, the presence of the signal peptide can be used *a posteriori* to further increase the stringency of the classification or to calculate an enrichment of predicted CRNs in secreted proteins that can give an external validation.

The strength of the SVM-based classification scheme is that it does not depend on the presence of one or a few well defined motif, but on the combined presence/absence of several motifs, and therefore it should allow making better inferences with respect to a

rigid regular expression. For instance, *A. euteiches* possesses [FL]xLYLALK and *P. ultimum* has LxLYLARK motifs that are considered LFLAK variants and should therefore be considered *bona fide* CRN motifs. These instances would be missed using simple regular expressions based on *Phytophthora* Crinkler proteins, and a regular expression encoding all the variability would become extremely unspecific. On the contrary, the probability matrix approach allows a better representation of the variability of the motifs in a position specific way and therefore should improve the identification of marginal similarities. Some divergence from the most probable motif is tolerated and variants are scored on the basis of their probability. Calculation of the probability clearly poses a problem concerning the threshold to consider a motif to be present. With our approach we train a model with *bona fide* Crinkler proteins and we let it find out CRNs among new proteins, without the need for specifying thresholds. Partially conserved motifs are moreover combined with others increasing the probability that the model will correctly classify more proteins.

To provide a more classical result, we also searched for CRN using the widely used regular expression approach. The regular expressions used were L[A-Z]L[FY]LAK and [IVM]HVL[VI]VVP for the LFLAK and VVP motifs, respectively.

Genome analysis of *Pythium ultimum* revealed that the YxSLK motif was enriched in the secreted proteins with respect to the full genome. 32 out of 44 members identified in *P. ultimum* genome were induced from 2- to 40-fold during *Arabidopsis* infection<sup>29</sup>. The motif is constrained between residues 61-80. As previously, we define a YxSLK group containing proteins with an occurrence of the regular expression Y[A-Z][ST][LV][KR] (when indicated, within the N-terminal 100 residues of the protein and together with a signal peptide). This extended regular expression derives from a reanalysis of the motif found by MEME when the input sequences are all the proteins annotated as belonging to “*Family 3*” in Lévesque *et al.*<sup>29</sup> (**Supplementary Fig. S22**). Additional non default parameters were “-protein -w 5 -n motifs 20 -mod zoops -minsites 10”. MEME<sup>30</sup> analysis returned a motif corresponding to the YxSLK pattern ranking 9th over 20 requested motifs of length 5. This YxSLK pattern appears to be present in 36 out of the 51 “*Family 3*” sequences, while some of the motifs ranking higher are present in almost all of the sequences. *P. viticola* has the largest number of members of this class among the biotrophs, comparable to the *Pythium* species, but much lower than *Phytophthora* species (**Supplementary Table S14**).

Randomization of the sequences positive for one of the regular expressions  $r$  for  $m$  times allowed to count the number  $n$  of occurrences of the pattern  $r$  given a random distribution of residues and therefore to discern the occurrences observed by chance (e.g. for compositional biases in the protein sequence). For all motif searches using regular expressions, we calculated the significance of the occurrences found and we considered further only those significant at 0.05. The empirical p-value was calculated as:  $p = \frac{n+1}{m}$ .

Apoplastic effectors were identified by exploiting available HMM models from Pfam<sup>31</sup> (<http://pfam.xfam.org/>), as indicated in **Supplementary Table S15**. The scanning was made using HMMER<sup>32</sup> with a threshold of  $e^{-6}$  on the “E-value seq” field.

## Gene expression profiling

We performed an infection of *Vitis vinifera* cv. ENTAV115 with *P. viticola* (isolate ‘PvitFEM01’) and harvested non-infected and infected plants at five different time points (0, 24, 48, 72, 96 and 168 hours post-infection, hpi) with 20-25 plants in two replicates each. Each replicate corresponded to an independent infection experiment. We also collected sporangia of *P. viticola* from infected material at late time points (96 and 168 hpi). The non-infected plants, infected ones and the sporangia were pooled to obtain three samples

called C, I and S, respectively. After RNA extraction using the Spectrum plant total RNA kit (<http://www.sigmaaldrich.com/>) we built the RNA-Seq libraries using the TruSeq RNA library prep kit ([www.illumina.com](http://www.illumina.com)) following the manufacturer's instructions. We performed a paired-end RNA-Seq (PE 2x100) from libraries C, S, I and duplicate libraries of non-infected and infected tissues collected at 0, 24, 48, 72, 96 and 168 hpi. In total, 25 libraries were sequenced on a HiSeq 2500 platform ([www.illumina.com](http://www.illumina.com)). The number of reads obtained for each library ranged from 20.5 to 97 million reads whereas the absolute number of reads mapping to *P. viticola* and *V. vinifera* genomes reached 68.5 million in the non-infected 72 hpi library (**Supplementary Table S17**). Interestingly, only 49 reads from the library C mapped concordantly on the *P. viticola* genome draft assembly, indicating that if a contamination from grape DNA still exists in our draft assembly, it is not significant. Sequences obtained from the pooled libraries were used for the validation of the gene prediction and supported the *P. viticola* transcript annotation. Reads of the pooled libraries aligned on *P. viticola* draft assembly using TopHat with no mismatches detected 14,011 loci in library I (corresponding to a total of 15,253 predicted genes), 17,024 loci in library S (18,293 genes). In total, if all genes predicted were combined we validated the expression of 17,314 loci (18,335 genes).

Differential expression analysis of *P. viticola* and *V. vinifera* transcriptomes was performed using TopHat followed by cufflinks, cuffmerge and then cuffdiff<sup>15,33</sup>. TopHat was run with option `-N 0` (number of mismatches) using the reads from the different libraries independently. Cufflinks was run using the reads accepted by TopHat, to estimate gene expression abundances of the transcripts annotated in the gff file provided as input. Options were as default except that we applied corrections for multiple mapping and composition bias of fragments (options `-u -b`). The transcripts.gtf files produced for each library by cufflinks were then merged for *V. vinifera* and *P. viticola* separately using cuffmerge. The merged.gtf transcripts were used as an input to cuffdiff to evaluate differential expression. The transcripts returned by cufflink programs are a combination of annotated ones, present in the annotation file provided during the run, and a certain number of newly discovered transcripts that span genomic regions not covered by any annotated transcript in the provided gtf file. Here we focus on the former.

Genes significantly changing their expression level during infection in *Vitis vinifera* were identified using cuffdiff with the option `-time-series`, such that every time-point is compared to the previous one. We detected 740 differentially expressed genes (DEG) (at  $FDR \leq 0.001$ ). The list showed no overlapping at all with the DEGs identified with respect to the control libraries (whereby all gene expression levels are tested against the t0 time point). No NBARC domain containing genes were detected as differentially expressed with the time series option while 116 of them come out as DEGs when comparing the infected and the control libraries. The enrichment analysis revealed that genes responding to stimulus are the most differentially expressed (**Supplementary Table S28**).

## Transcriptional profiling of *P. viticola* during infection

We detected the expression of 18,335 *P. viticola* genes at all time points comprising 1,061 transcripts coding for proteins with a predicted signal peptide. We detected only few reads mapping on the *P. viticola* genome at 24 and 48 hpi (**Supplementary Table S19**). Given the small number of reads from *P. viticola* in the two first time points, we analyzed the differential expression of genes starting at 72 hpi. Although it is not possible to perform a differential gene expression at early time points we, nevertheless, identified the most induced *P. viticola* genes at those time points. At 24 hpi we detected gene expression for 3,680 *P. viticola* genes. However, using cufflinks we found only 192 genes with expression

levels classified as significantly different from 0, which is clearly an effect of the low number of *P. viticola* reads in this sample. Using our GO annotation of the *P. viticola* proteome (**Supplementary Table S1**), we detected enrichment of several GO categories at  $FDR \leq 0.05$  (**Supplementary Table S19**), indicating an active metabolic activity of *P. viticola* during the early phase of infection coupled with stress response activities that are likely a consequence of the first defense barriers put in place by the plant. We also detected a significant enrichment in proteins with predicted signal peptide both considering the transcripts significantly different from zero (19/192 vs 1061/18335,  $p\text{-value}=1.5 \times 10^{-2}$ ) and the entire set of transcripts expressed at 24 hpi (270/3680,  $p\text{-value}=1.6 \times 10^{-5}$ ) (**Supplementary Table S19**). A similar situation concerning induced metabolic processes and enrichment of proteins containing a signal peptide was observed at 48 hpi, indicating that metabolic activity is high at these stages of infection as well as protein secretion (**Supplementary Table S19**).

At 24 hpi, we detected the expression of 1 out of 68 CRN, 10 out of 57 RxLR-regexp (4 with signal peptide), 259 out of 802 RxLR-like (56 with a predicted secretion signal) and 56 out of 308 YxSLK (8/87 with signal peptide) effectors. Our data suggest that CRN are rather deployed at later time points during the infection and subsequently kept expressed at high level (**Supplementary Fig. S23**). With 32% of the transcripts detected at 24 hpi, the RxLR-like group is the most represented effector group at this time point, followed by the YxSLK effectors. We also detected significant expression of many transcripts corresponding to proteins with a predicted signal peptide, but not classified as effectors, that were grouped together according to the expression profiles (**Supplementary Fig. S23**). Our analysis indicates that the RxLR expressed at 24 hpi are enriched for the presence of the Pfam model Pkinase and Pkinase-Tyr (protein phosphorylation) and to a lesser extent EF-hand (calmodulin), zf-C3HC4 and zf-RING (ubiquitination), LRR. The latter is particularly interesting as it is a domain known for its presence in plant resistance genes. We find this domain in a total of 111 *P. viticola* proteins of which four are RxLR homologs that do not possess canonical or alternative RxLR occurrences (**Supplementary Fig. S24**). Besides their identification in several oomycetes, no information about their putative role is available. Interestingly 15 of these genes are expressed at 24 hpi and some of them have their maximum expression level at this time, representing promising effector candidates for further studies (**Supplementary Fig. S25**). The YxSLK effectors expressed at 24 hpi are enriched in Reprolysin (a zinc metalloprotease) and other peptidases, as the apoplastic effectors. Genes coding for proteins not classified as effectors but expressed at 24 hpi and with a predicted signal peptide are enriched in specific domains such as glyco-hydrolase, Cu-oxidase, thioredoxin, pkinase and jacalin.

The libraries obtained for the 24 hpi and 48 hpi contained too few reads from *P. viticola*. Nonetheless, we were able to detect 1,284 DEGs from the remaining contrasts; 538 of these genes were also expressed at 24 hpi, indicating that some of the most early expressed genes also change their expression level at later time points. We exploited the GO functional annotation of the *P. viticola* genome obtained using Argot2<sup>12</sup>, to assess functional enrichment (**Supplementary Table S21**) and identified several processes ( $FDR \leq 0.01$ ). We observed an enrichment of processes that are related to development of anatomical structures and likely to germination, biosynthesis of the germ tube, hyphae and the haustorium. We also detected an enrichment of catabolic activities, such as glycolysis, fatty acid beta-oxidation using acyl-CoA dehydrogenase, tryptophan catabolism, proteolysis, indicating an active metabolism of *P. viticola* during the infection.

## Agrobacterium infiltration assays and qRT-PCR

The coding regions, including the start codon (ATG), of *P. viticola* effectors PVITv1003209, PVITv1005727, PVITv1018092, PVITv1020941, PVITv1016922, PVITv1021061, PVITv1008294, PVITv1008311 were amplified from cDNA of sporangia (prepared with SuperScript VILO cDNA synthesis kit from ThermoFisher Scientific) using the primers indicated in **Supplementary Table S35**. The PCR was performed using the Phusion high-fidelity DNA polymerase (ThermoFisher Scientific) following the manufacturer's instructions and cloned in the pENTR/D-TOPO vector (ThermoFisher Scientific). After verification of the sequences by Sanger sequencing the open reading frame without the signal peptide was amplified by PCR and restored by adding an ATG in frame. Both cDNA version with (+sp) or without ( $\Delta$ sp) signal peptide were then recombined using the Gateway technology in the pK7WG2D binary vector. As a control for the infiltration assays, the MCS of the vector pBluescript SK(+) was amplified and also inserted in the pK7WG2D binary vector and called "empty vector". After verification of the correct cloning by Sanger sequencing the vectors were introduced in *Agrobacterium tumefaciens* GV3101. The infiltration assays were carried out in sterile conditions as described in Zottini *et al.*<sup>34</sup> on *Vitis vinifera* cv. Sultanina and *Vitis riparia* *in vitro* grown plants. The phenotype of plants was visualized and photographed one week after infiltration. After taking a picture the leaf was then stained using Trypan blue as described in Roetschi *et al.*<sup>35</sup>. The experiment was repeated ten times with 20-25 plants at each experiment. Infiltrated leaves were also flash frozen in liquid nitrogen and the RNA extracted using the Spectrum plant total RNA kit (<http://www.sigmaaldrich.com/>). After reverse transcription of one  $\mu$ g of RNA using the SuperScript VILO cDNA synthesis kit (ThermoFisher Scientific), the real-time PCR on the effector and GFP was performed using the 2x SYBR green qPCR master mix ([www.bimake.com](http://www.bimake.com)) on a ViiA7 real time PCR system (ThermoFisher Scientific). The fold induction of RxLR\_PVITv1008311 normalized to the house keeping gene F\_PvEIF1b was calculated using the comparative Ct method<sup>36</sup>. The same real-time PCR conditions were used to measure RxLR\_PVITv1008311 expression levels *in planta* during the infection time course on Pinot Noir ENTAV115 as well as in sporangia in Figure 3a and 3b.

## Metabolism

We studied the *P. viticola* metabolic abilities by assigning KEGG orthologs groups to proteins using KAAS<sup>11</sup>. This analysis was in addition performed for *H. arabidopsidis* (the closest biotroph) and *P. infestans* (the closest hemibiotroph), to characterize commonalities and differences. Maple<sup>37</sup> was used to compare the metabolic networks of the three organisms at once (**Supplementary Table S26**).

## sRNAome and degradome

To identify sRNAs from *P. viticola* we first filtered the sRNA reads by mapping them on the grapevine genome and then on an ensemble of bacterial genomes to remove most contaminants. The 19-30 nt sRNAs that passed this filtering step were then mapped on the *P. viticola* genome. The reads mapping uniquely on our draft *P. viticola* assembly with 100% identity over the entire length of the read were further considered. sRNA target predictions were performed using SeqTar<sup>38</sup>. We first explored regulation of *P. viticola* transcripts by endogenous sRNAs. To detect sRNA targets, we ran SeqTar using the 21-nt long sRNAs perfectly mapping on the *P. viticola* draft assembly, the *P. viticola* transcripts, and PARE reads obtained from a pool of the time points at which we performed sRNA. All parameters were default, except a 100 shuffling of the sRNAs to calculate the significance

level of the number of mismatches of an sRNA on a given transcript. The SeqTar output was filtered at mismatch  $p\text{-value} \leq 0.001$ , valid peak height  $p\text{-value} \leq 10^{-10}$  and binding score  $p\text{-value} \leq 0.001$ . After applying the above filters, we obtain 68 putative regulations, implemented by 65 different sRNAs on 39 transcripts (**Supplementary Table S32**).

To detect *P. viticola*-*V. vinifera* cross-regulations, we ran SeqTar<sup>38</sup> using 21-nt long sRNAs perfectly mapping on the *P. viticola* draft assembly, grapevine transcripts as targets, and a degradome library obtained from a pool of all of the infected time points at which we performed sRNA sequencing. All parameters were default, except that a 100 shuffling of the sRNAs was used to calculate the significance level of the number of mismatches of an sRNA on a given transcript. The SeqTar output was filtered at mismatch  $p\text{-value} \leq 0.001$ , valid peak height  $p\text{-value} \leq 10^{-10}$  and binding score  $p\text{-value} \leq 0.001$ . After applying the above thresholds, we obtained 344 putative regulations of grapevine transcripts, implemented by 318 different *P. viticola* sRNA sequences on 296 different *Vitis* transcripts (**Supplementary Table S33 and S34**).

We also explored the miRNA-mRNA regulatory network in *V. vinifera*. The analysis was performed as for *P. viticola*; the output was filtered to retain only predictions with  $p\text{-value mismatch} \leq 0.001$ ,  $p\text{-value binding score} \leq 0.001$  and  $p\text{-value of the number of valid reads} \leq 10^{-10}$ . After filtering we retained 1,662 putative regulations for 1,327 sRNAs that regulate in total 889 *Vitis* genes. Among the putative regulators, we detected nine known miRNAs (**Supplementary Table S31**).

## Supplementary figures

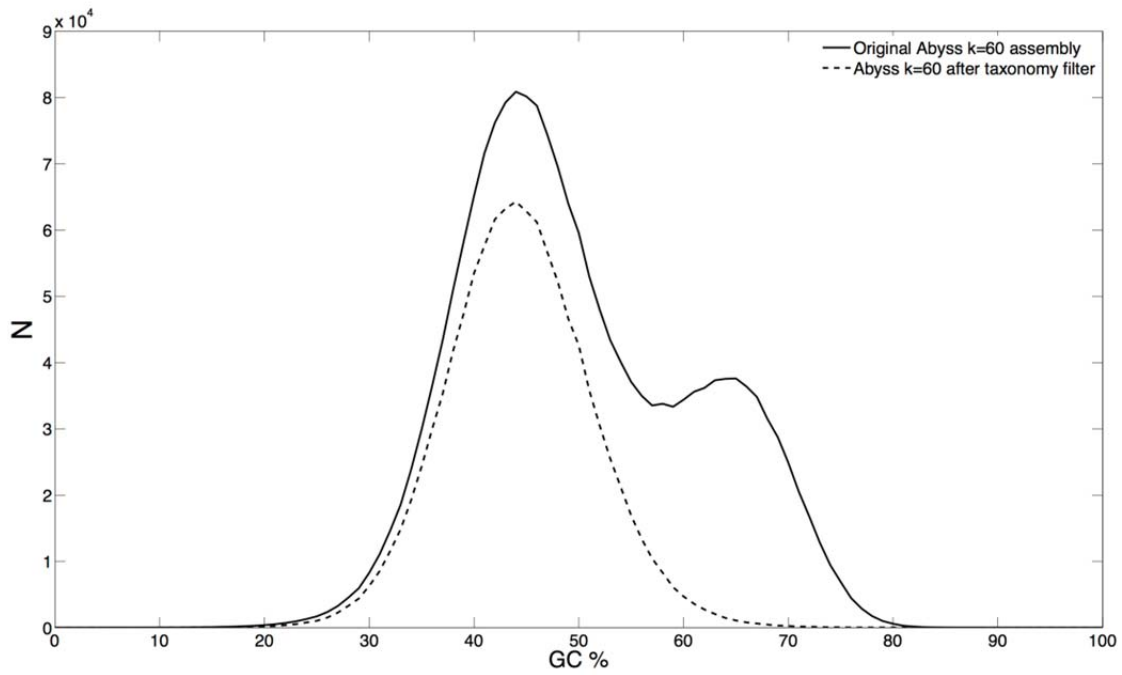

**Supplementary Figure S1.** GC content distribution for the original and the taxonomy-filtered assemblies.



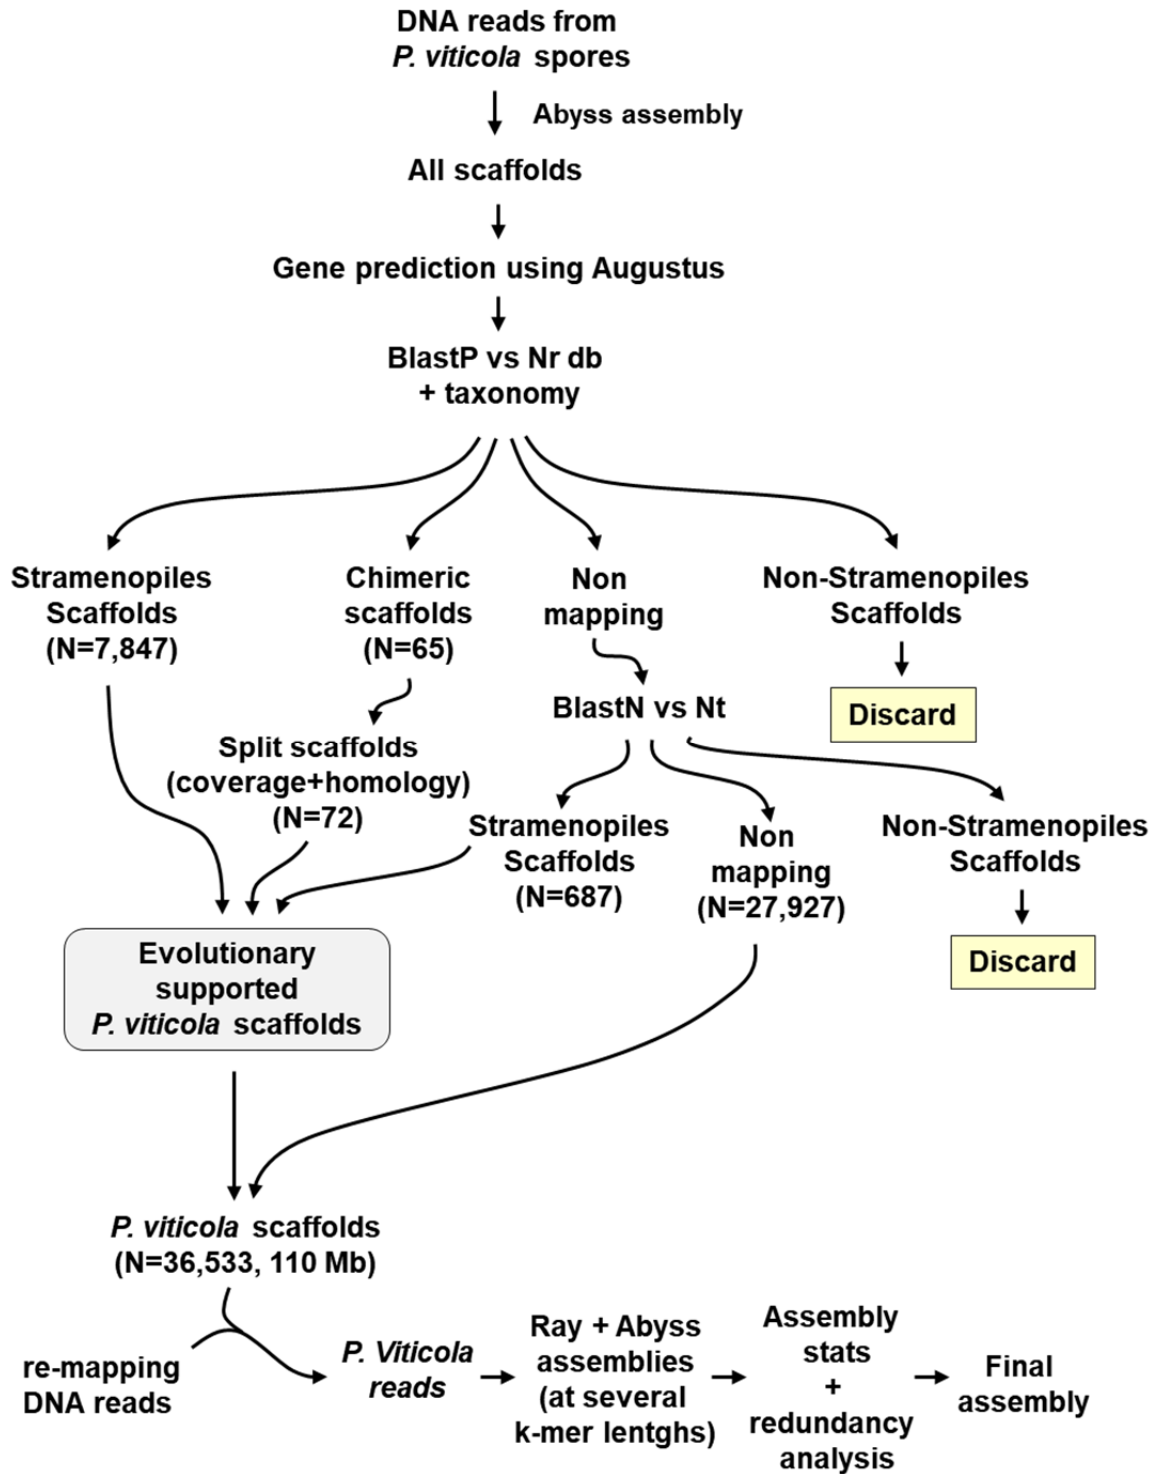

**Supplementary Figure S2.** Strategy implemented to filter out sequences not coming from *P. viticola*.

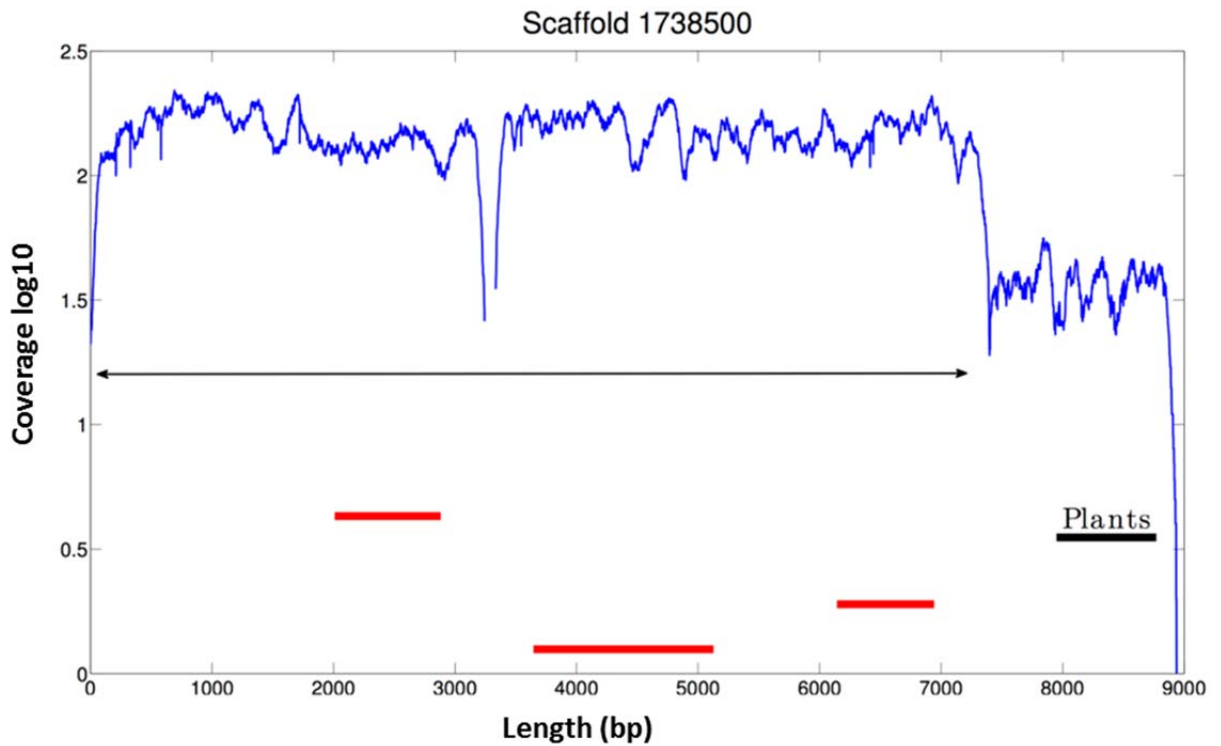

**Supplementary Figure S3.** Example of a chimeric scaffold.

The first part of the scaffold codes for three proteins with homology to Stramenopiles and it is therefore likely part of the *P. viticola* genome. The average coverage of this region is well above 100 (y axis is in log10 scale). The remaining 1,500 nucleotides have a much lower coverage and homology to plant sequences. Therefore, the scaffold was included in the *P. viticola* assembly after deleting the low coverage region.

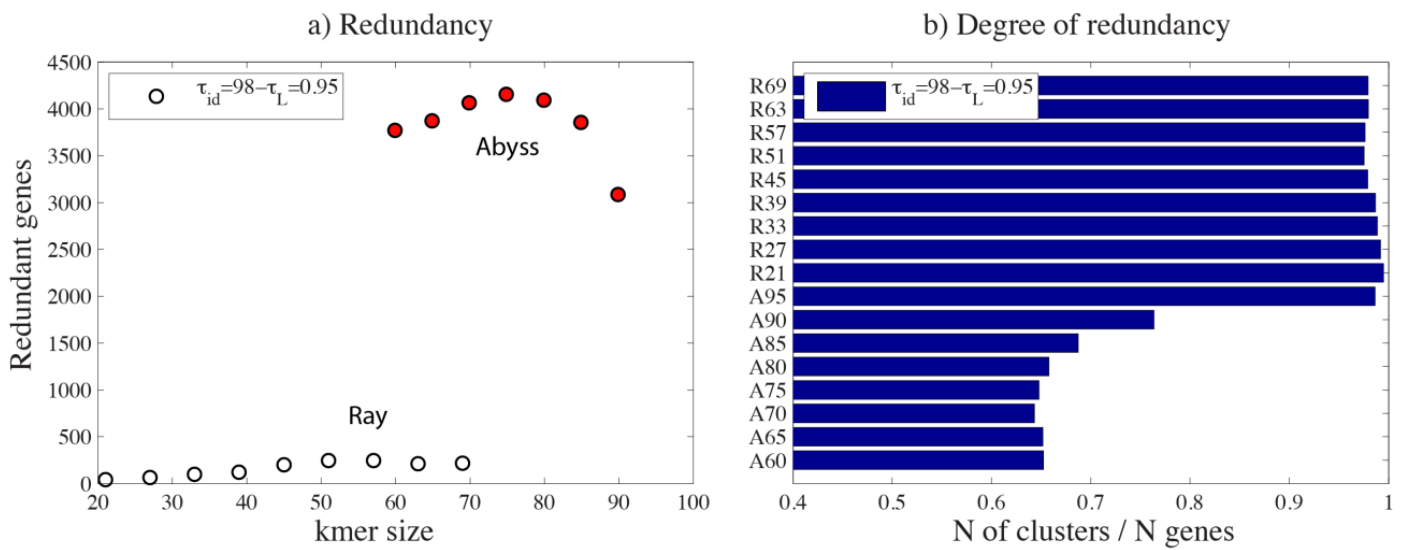

**Supplementary Figure S4.** Clustering sequences that share more than 98% identity and have lengths not differing by more than 5% identified groups of unique sequences.

The number of genes considered as redundant (**a**). The ratio of the number of unique sequences and the number of predicted genes indicates that the coding genome is highly redundant in ABySS assemblies (from A60 to A95), as this ratio is only 0.6-0.7, while for Ray assemblies (From R21 to R69) this ratio is close to 1 (**b**).

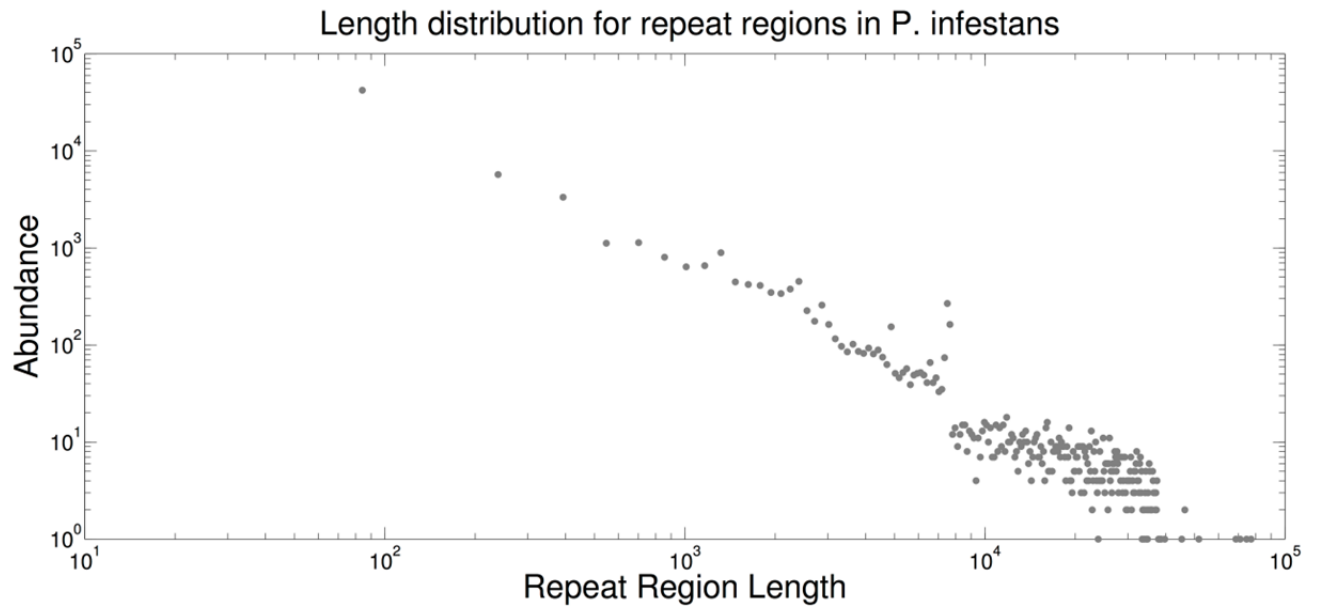

**Supplementary Figure S5.** Length distribution of *P. infestans* repeat regions

Most repeats (80%) are below 500 nucleotides, but still there are over 12,000 repeats longer than that. The data was obtained from Haas *et al.*<sup>5</sup>.

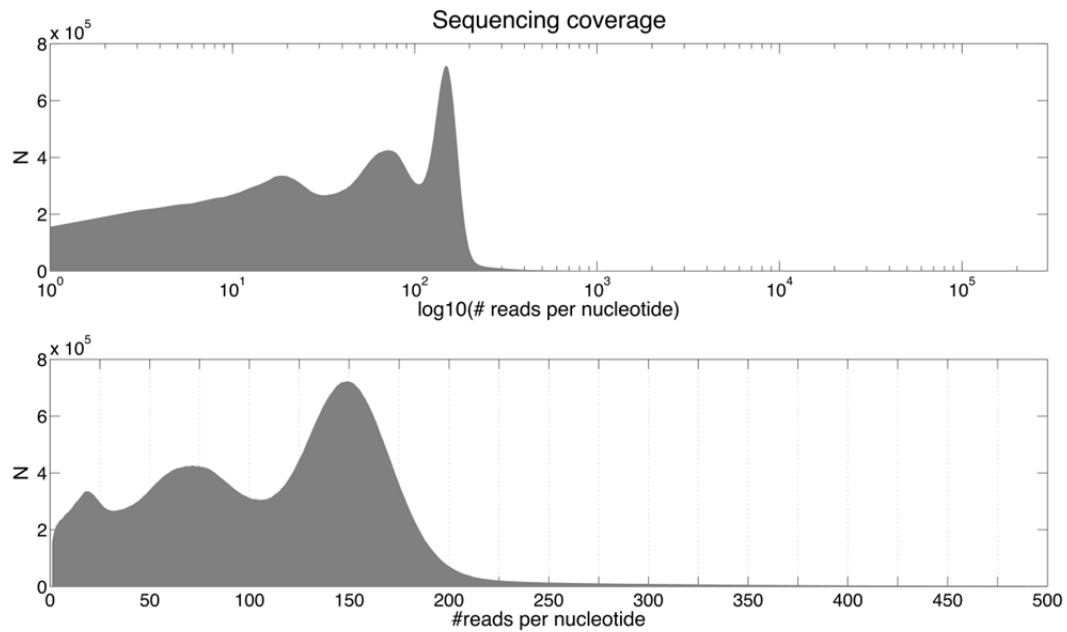

**Supplementary Figure S6.** Coverage per nucleotide of the final assembly.

The shape of the distribution is likely the result of different haplotypes of *P. viticola* contained in the inoculum used for infection (see supplemental note for statistics about the final assembly).

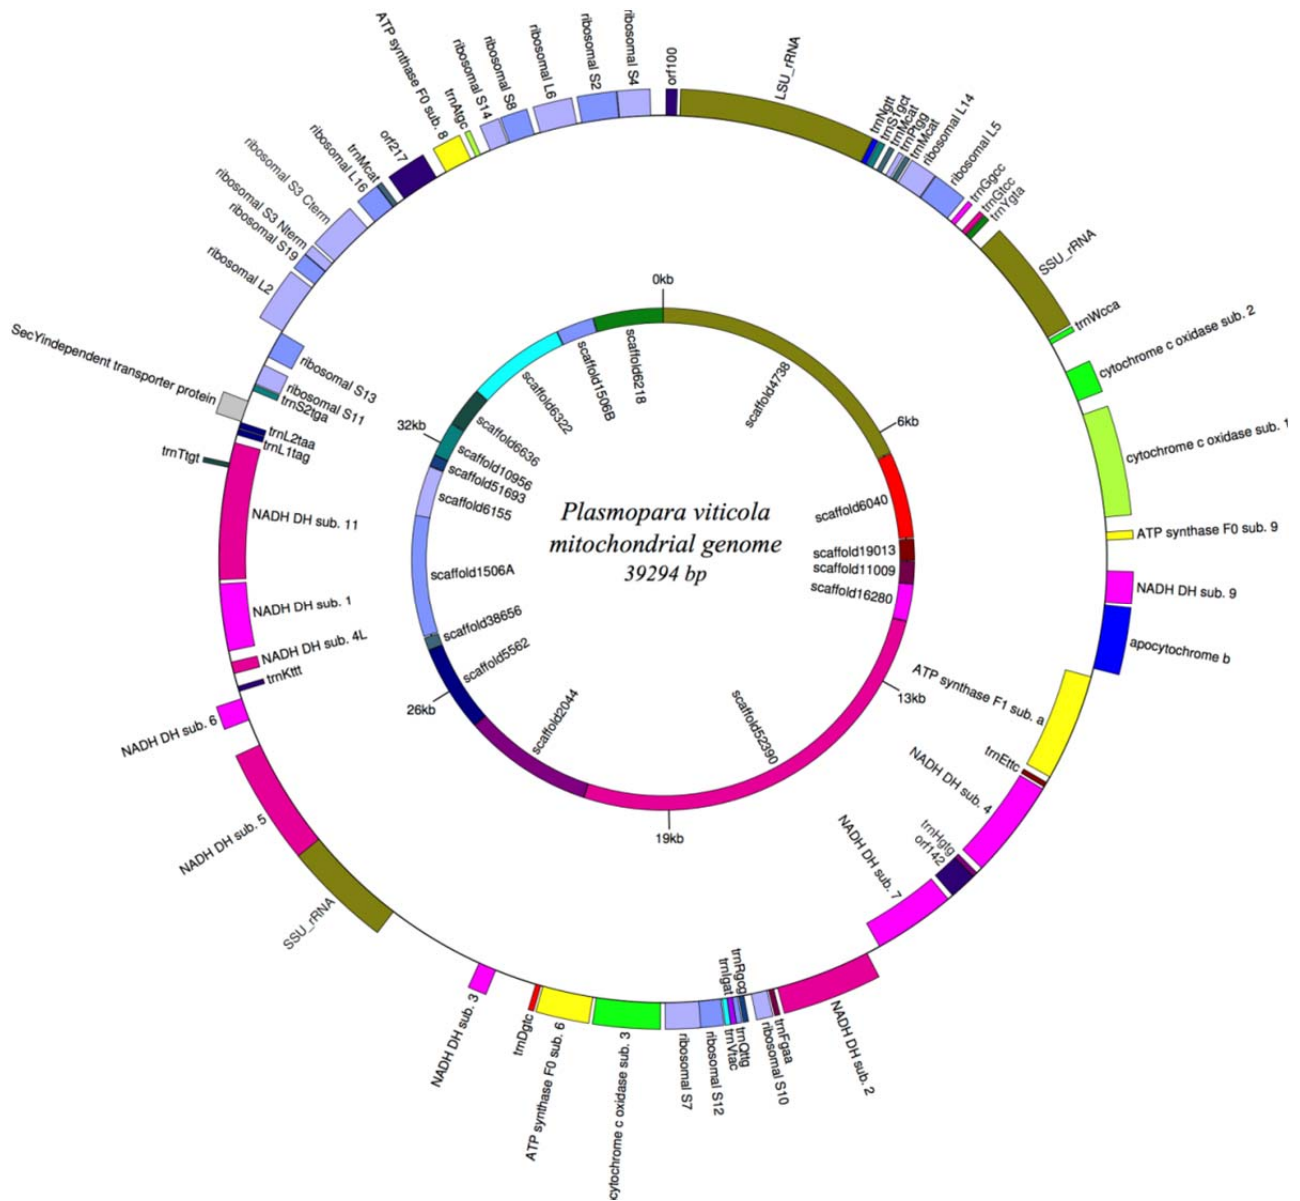

**Supplementary Figure S7.** Schematic representation of the assembled *P. viticola* mitochondrial genome.

The outer layer corresponds to the predicted genes, while the inner one indicates the scaffolds used for assembly. The tRNAs are indicated by the abbreviation “trn”, followed by the letter corresponding to the amino acid bound and the recognized codon.

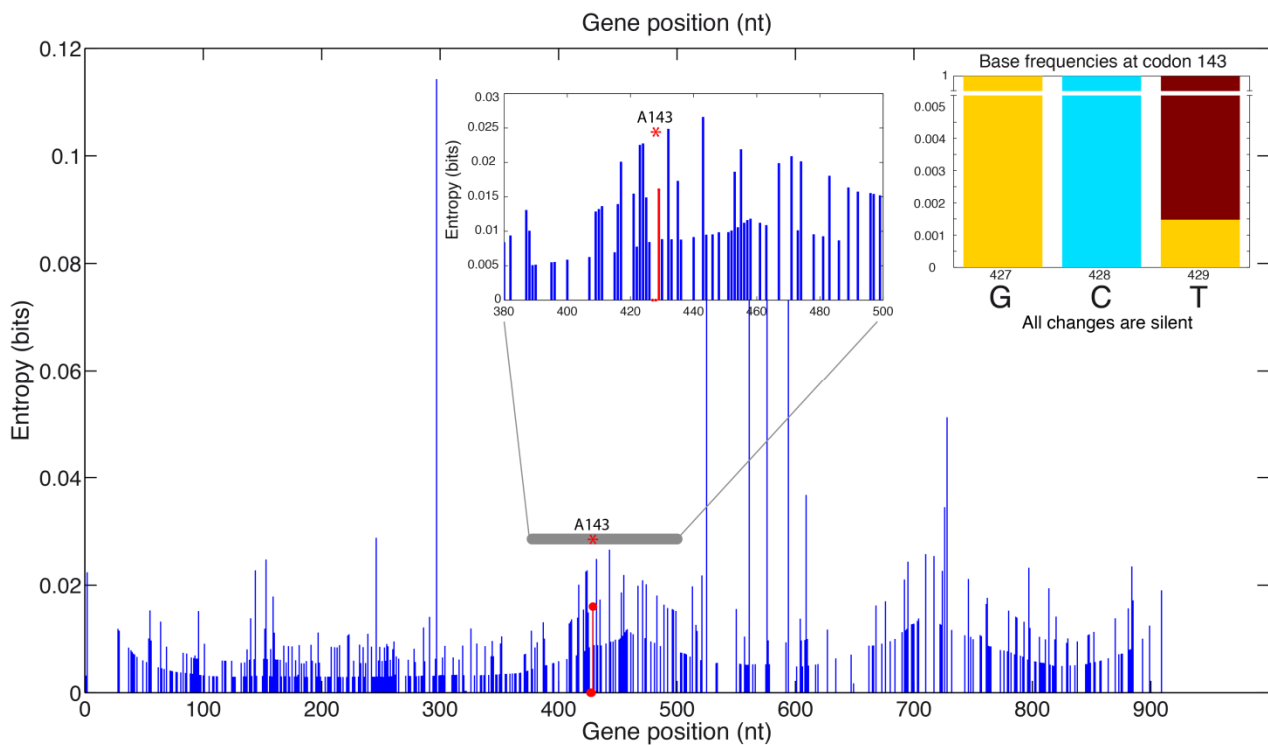

**Supplementary Figure S8:** Variability in the mitochondrial apocytochrome b gene sequence.

The variability was obtained by mapping DNA reads and retrieving SNPs using *mpileup* in samtools. Entropy of each position of the gene was calculated by extracting all possible nucleotides found in the original reads and plotted to show the existence of multiple “haplotypes” or polymorphisms. A single amino acid change, G143A, in the apocytochrome b protein is known to confer resistance to fungicides acting as Quinone outside Inhibitors (QoI). The mitochondrial assembly of ‘PvitFEM01’ revealed an Alanine at amino acid position 143. The variability at that position is moderate and always corresponds to silent changes. This indicates that the haplotypes that were sequenced are all resistant to QoI fungicides.

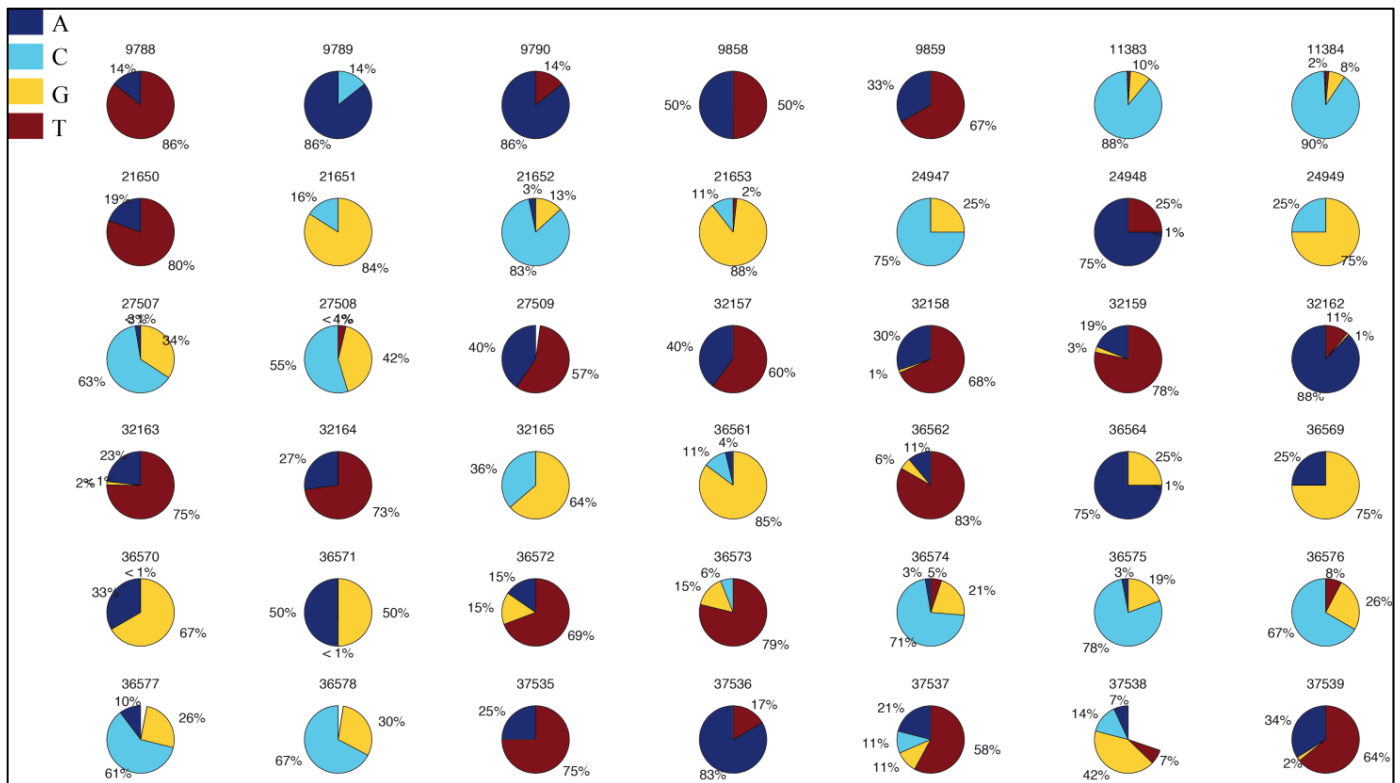

**Supplementary Figure S9:** Base composition at 42 mitochondrial positions with an entropy above 0.5 bits.

All of them are outside annotated genes (protein coding, tRNAs or RNAs). Empty slices stand for Ns.



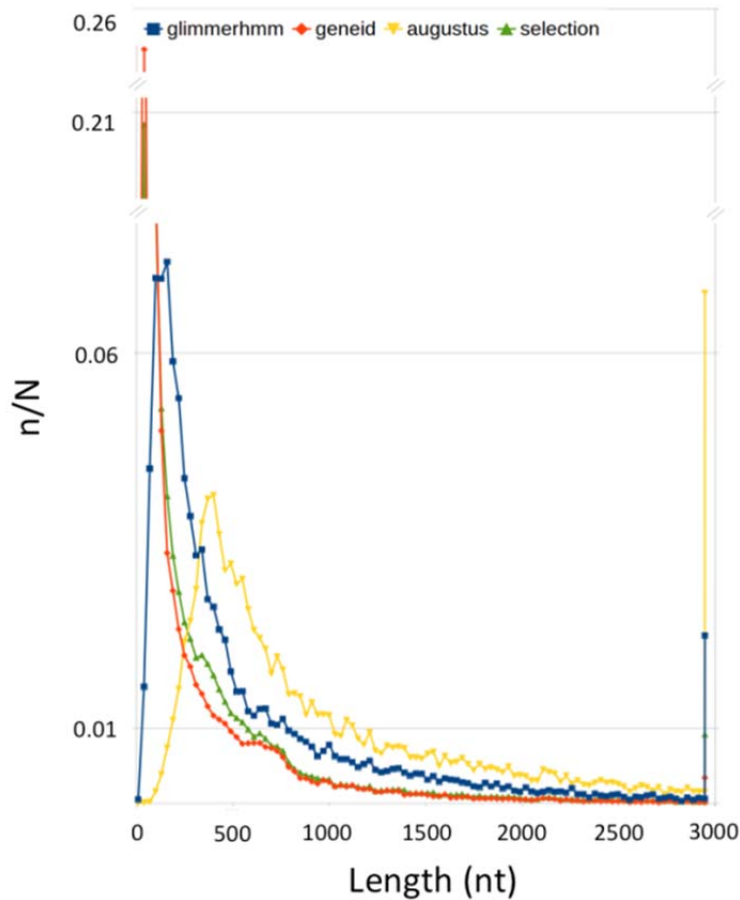

**Supplementary Figure S10.** Length distribution of the transcripts predicted by three gene finders.

Note that the Y axis has been broken two times to include the maximum peaks of the selection and GeneID distributions. GeneID outputs gene predictions that are on average shorter than those provided by GlimmerHMM and Augustus, with over 28,000 predictions shorter than 70 nucleotides (38% of all predictions Vs <1% and <0.1% respectively for GlimmerHMM and Augustus).

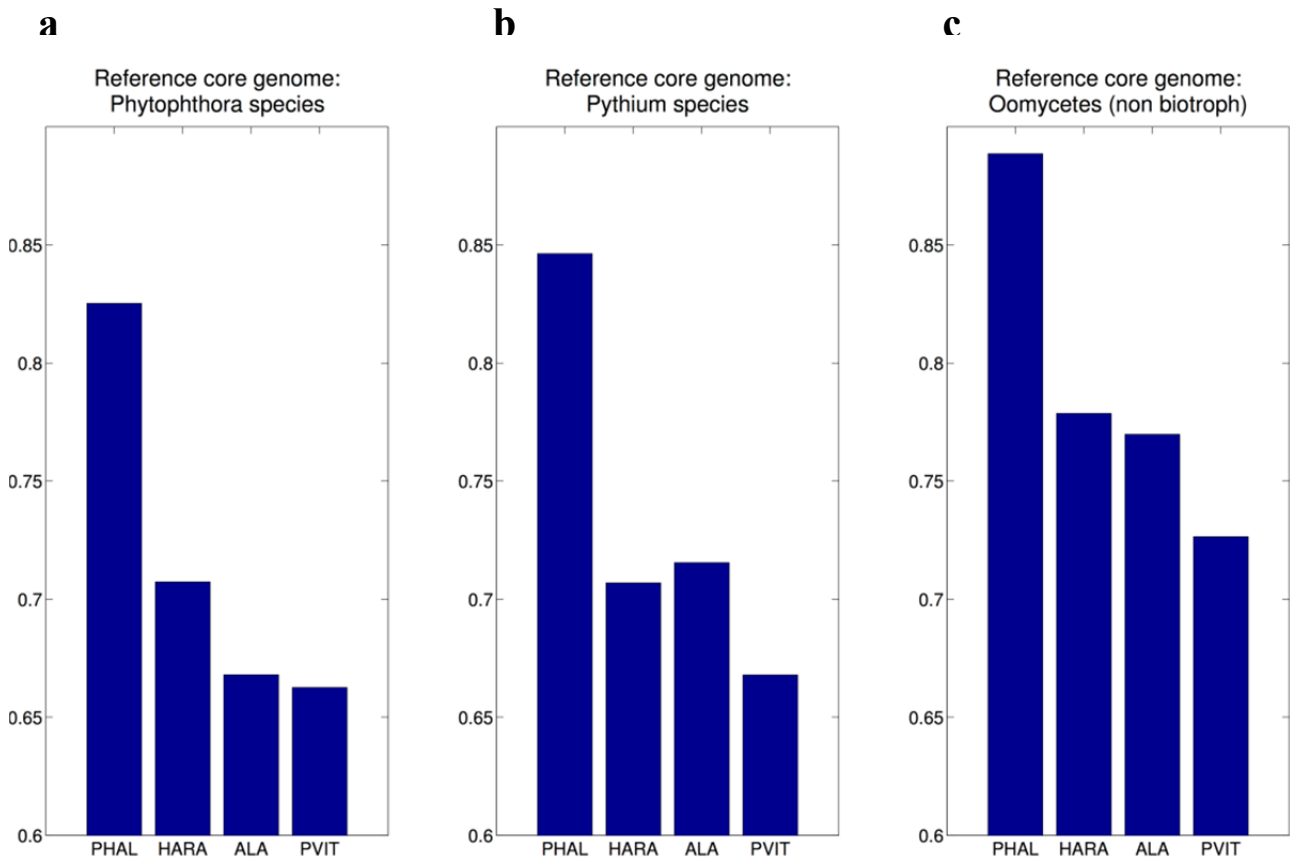

**Supplementary Figure S11.** The degree of shrinkage of the core genome when one of the biotroph species is added to the genome dataset can give information about the estimated completeness of the *P. viticola* genome.

Y-axis is the size of the core genome when the indicated biotroph is added to the dataset, with respect to the size when it is absent. By definition, the core genome can only decrease when adding more genomes. Since there are four biotrophs in the dataset, we compared the effect of adding one of them with what happens when we add *P. viticola* (PVIT). On the left (a) the core genome is calculated for all *Phytophthora* species considered in this work. The middle panel (b) shows the same but the reference core genome size is the one from *Pythium* species only. On the right (c) the core genome for all the oomycetes (without biotrophs) is used. The addition of the proteome of *H. arabidopsidis* (HARA) or *A. laibachii* (ALA) causes the core proteome size to shrink of about 30-35% with respect to *Phytophthora* and of 30% with respect to *Pythium*. *P. viticola* has a larger effect on the core proteome size. The most complete biotroph genome is the *P. halstedii* (PHAL) one, which seems to indicate that the biotrophs still have 80-85% of the genes present in *Phytophthora* hemi-biotrophic species. This suggests that our draft genome and the ones of *A. laibachii* and *H. arabidopsidis* might miss an additional 20% of the genes.

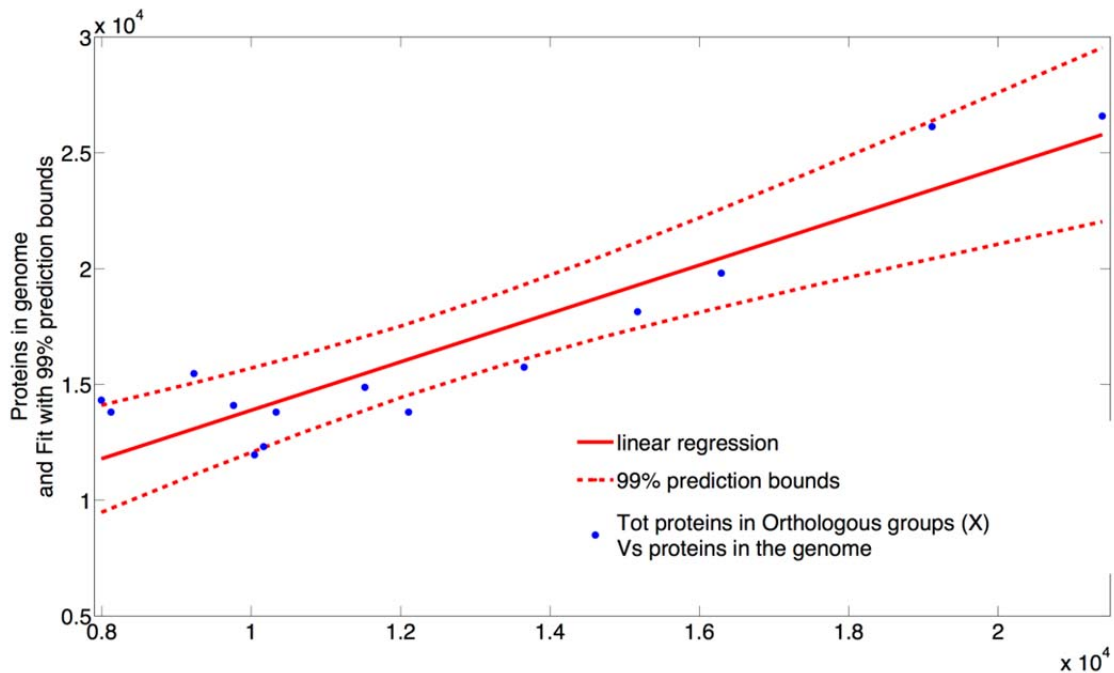

**Supplementary Figure S12.** An estimate of the “true” protein number in *P. viticola*.

Linear regression of the number of proteins classified into one of the orthologous groups through the Inparanoid analysis, and the size of the full proteome for all oomycetes. The adjusted squared correlation coefficient for the fit is 0.79 when the intercept parameter is set to zero and 0.83 when the intercept is included in the model. *P. viticola* was removed from the analysis and we use the parameters for estimating the likely number of proteins in the *P. viticola* genome.

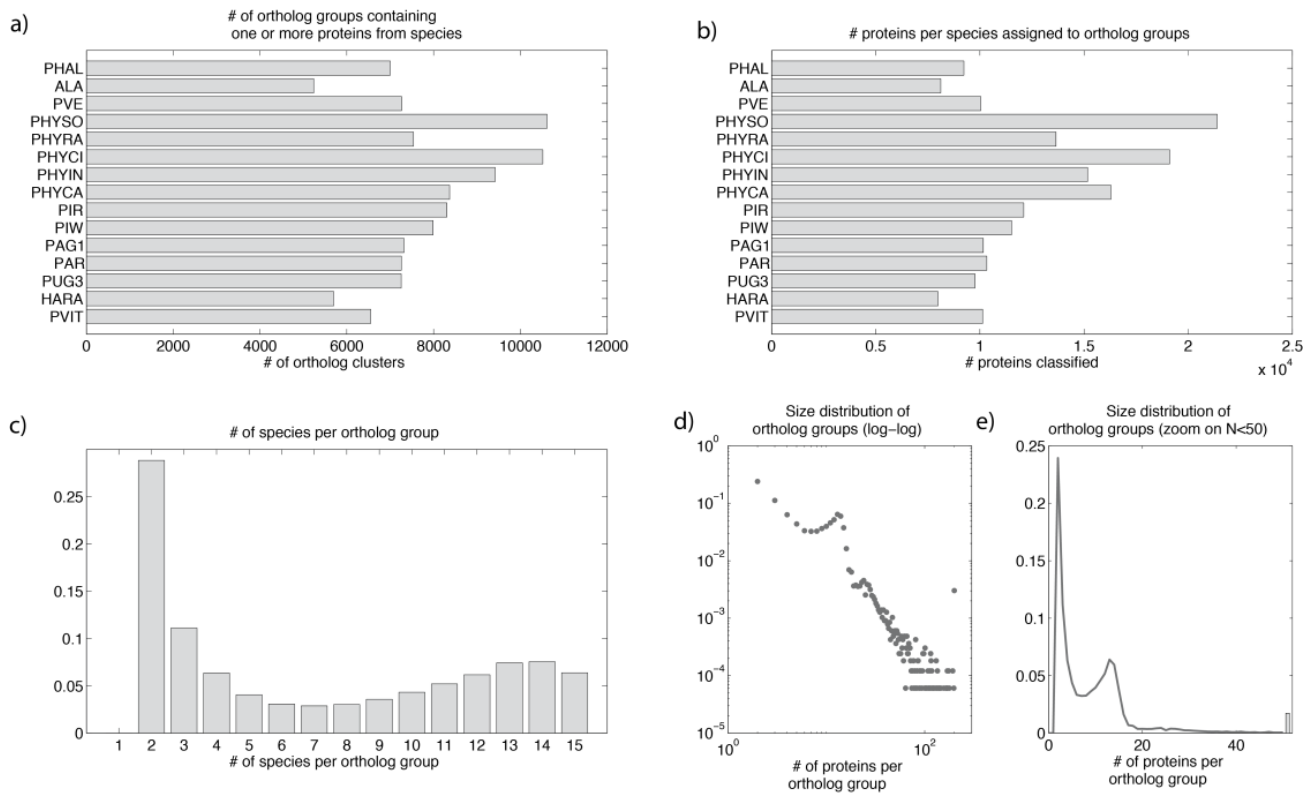

**Supplementary Figure S13:** Summary of the orthology analysis.

(a) Number of orthologous groups (OG) containing the indicated species (PHAL: *Plasmopara halstedii*, ALA: *Albugo laibachii*, PVE: *Pythium vexans*, PHYSO: *Phytophthora sojae*, PHYRA: *Phytophthora ramorum*, PHYCI: *Phytophthora cinnamomi*, PHYIN: *Phytophthora infestans*, PHYCA: *Phytophthora capsici*, PIR: *Pythium irregulare*, PIW: *Pythium iwayamai*, PAG1: *Pythium aphanidermatum*, PAR: *Pythium arrhenomanes*, PUG3: *Pythium ultimum*, HARA: *Hyaloperonospora arabidopsidis*, PVIT: *Plasmopara viticola*). (b) Number of proteins of one species assigned to an OG. (c) Number of species per OG (for instance category 15 contains the sensu strictu “core” proteins of the Oomycetes). (d) Distribution of the number of proteins per OG in log-log scale. (e) Detail of the distribution of the number of proteins per OG in the range 2 to 50 proteins. There are 635 groups with more than 30 proteins and 14 with more than 500. The largest OG has 2,632 proteins.

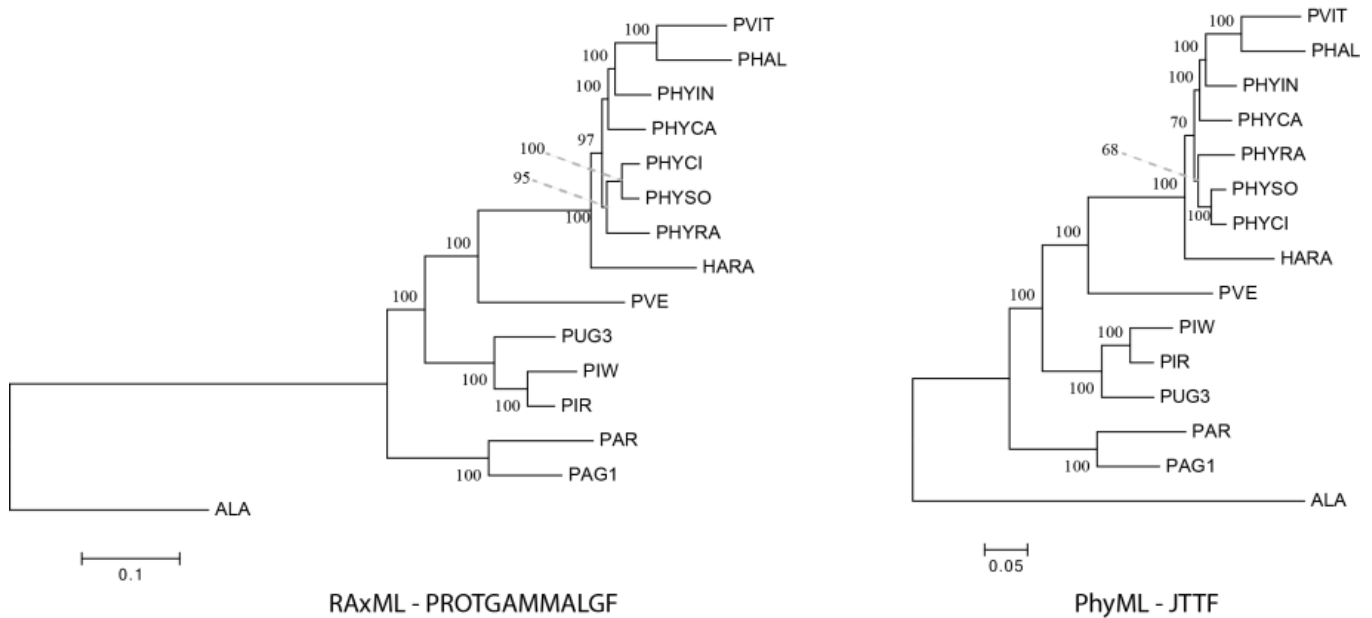

**Supplementary Figure S14.** Maximum likelihood phylogenetic trees built with RAxML and PhyML.

Evolutionary model is indicated. Equilibrium amino acid frequencies for the model were the empirical ones and rate heterogeneities are accounted for with a gamma distribution whose shape parameter was calculated during the phylogenetic reconstruction process. (PHAL: *Plasmopara halstedii*, ALA: *Albugo laibachii*, PVE: *Pythium vexans*, PHYSO: *Phytophthora sojae*, PHYRA: *Phytophthora ramorum*, PHYCI: *Phytophthora cinnamomi*, PHYIN: *Phytophthora infestans*, PHYCA: *Phytophthora capsici*, PIR: *Pythium irregulare*, PIW: *Pythium iwayamai*, PAG1: *Pythium aphanidermatum*, PAR: *Pythium arrhenomanes*, PUG3: *Pythium ultimum*, HARA: *Hyaloperonospora arabidopsidis*, PVIT: *Plasmopara viticola*).

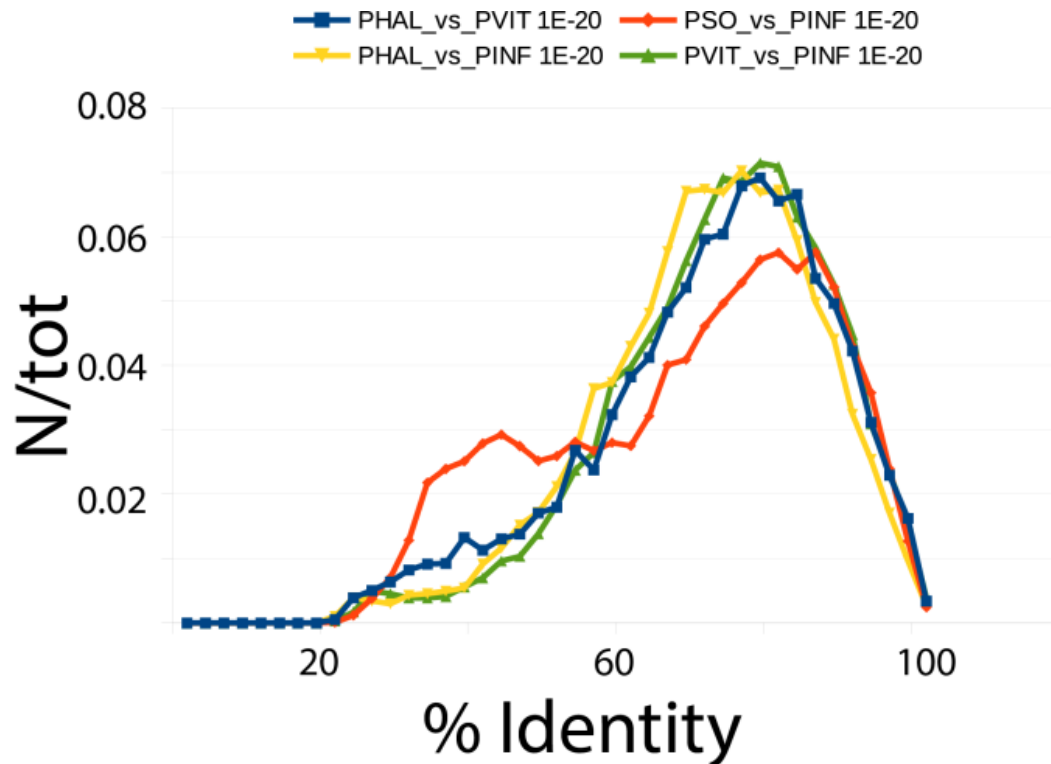

**Supplementary Figure S15.** Full proteome comparisons.

The identity percentage of the first blast hit for whole proteome comparisons performed using blastp (--max\_target\_seqs=1) is plotted. The blast output was filtered at  $e\text{-value} \leq e^{-20}$  and a histogram was built with the threshold passing alignments. To better appreciate the similarity among the two *Plasmopara* species (PHAL, PVIT) and *Phytophthora infestans* (PINF), we also performed the analysis for the latter vs *Phytophthora sojae* (PSO). The comparison of the two *Plasmopara* is not different from the comparisons *Plasmopara-Phytophthora infestans*.

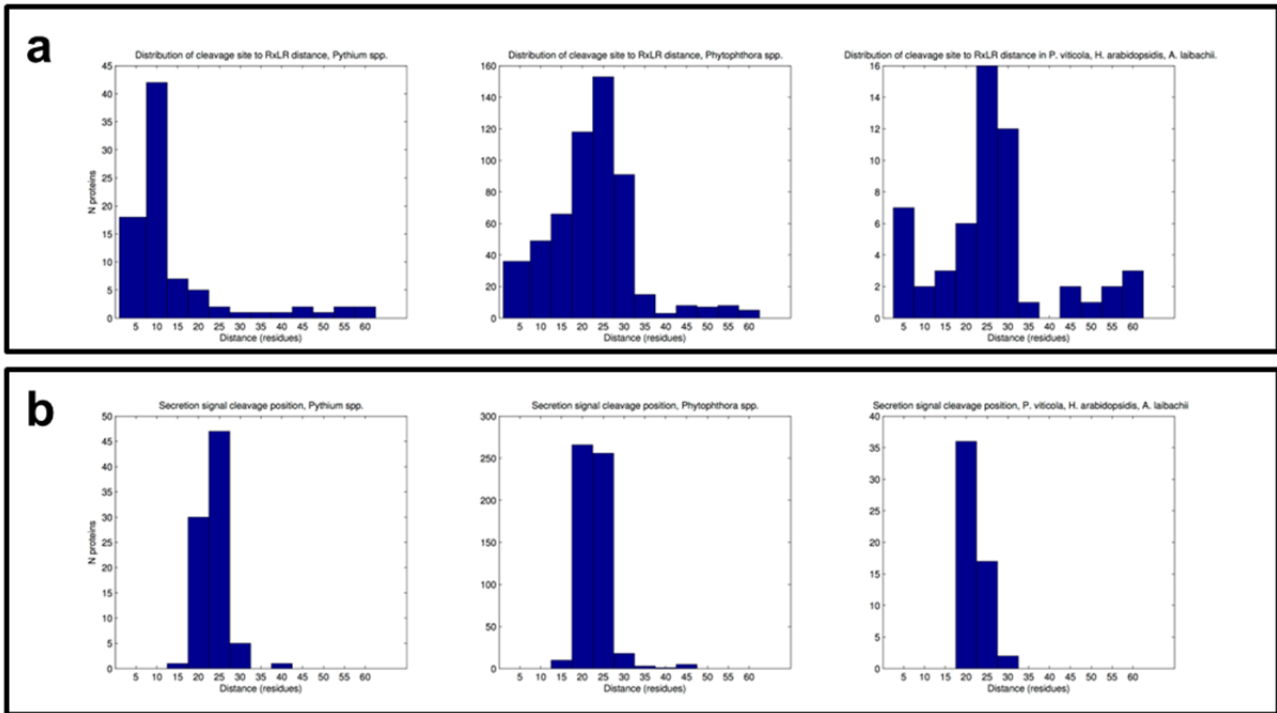

**Supplementary Figure S16.** Distribution of the distance and position of the signal peptide cleavage site in oomycete species.

(a) Distribution of the distance dividing the signal peptide cleavage site, as predicted by Signal-P<sup>39</sup> and the RxLR occurrence identified through match to the regular expression. (b) Distribution of the position of the secretion signal peptide cleavage site for proteins in (a) Data for *Pythium*, *Phytophthora* spp. and the biotrophs *P. viticola*, *H. arabidopsidis* and *A. laibachii* are indicated in the left, middle and right columns, respectively. A shorter distance between the cleavage site and the RxLR motif is specific to *Pythium* species suggesting differences in the machinery or the secretion system.

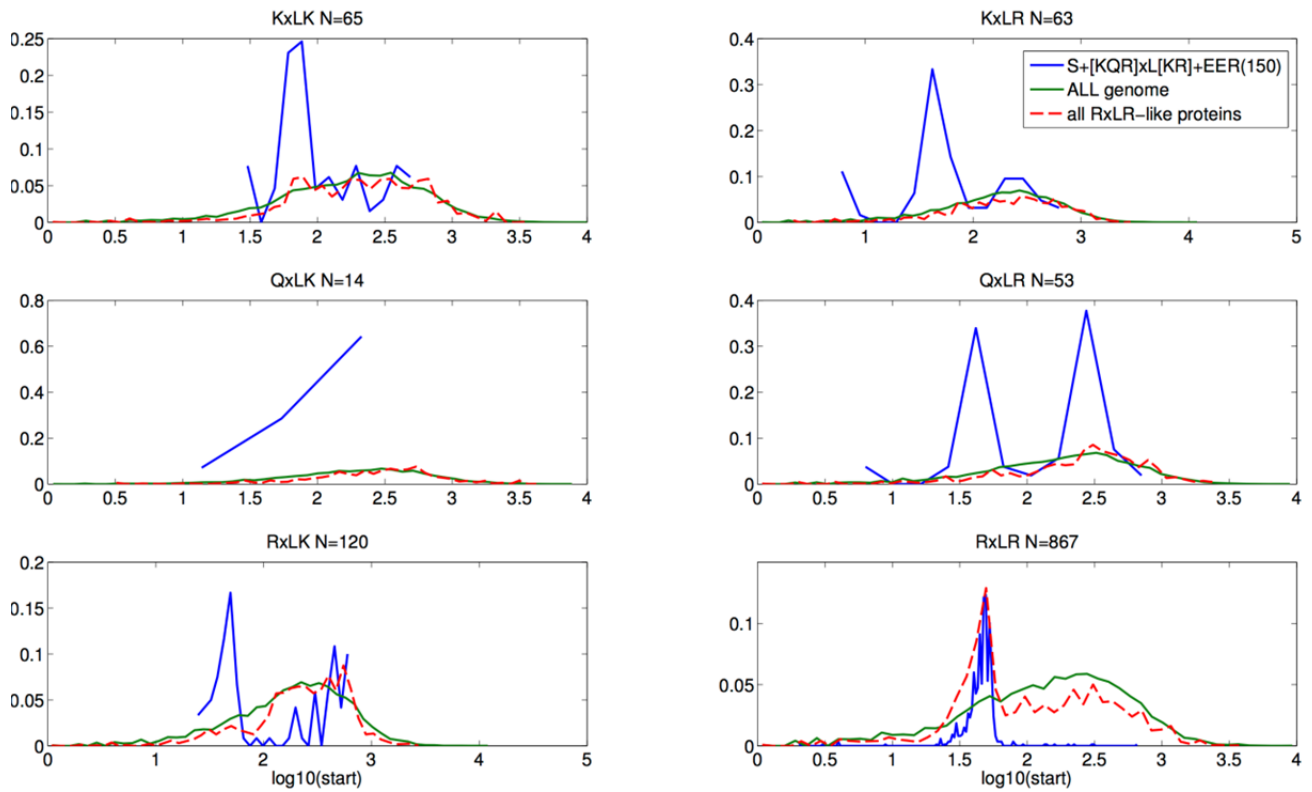

**Supplementary Figure S17.** As expected, some of the RxLR variants also have a biased localization towards the N-terminal of the proteins.

In the title of each plot we indicate the motif and the number of occurrences over all the RxLR-like. When plotting the start position of motifs found over the whole RxLR-like dataset we recover the background distribution (compare dashed red with green), in agreement with the presence of a lot of false positive RxLR through the homology search only. When adding constrains for selecting effector proteins we consistently reduce the number of candidates and we select proteins with a biased localization of the motifs, indicating a functional role for the motif. No motif has however a bias as strong as the canonical RxLR motif. Abundances were divided by the total in each data series.



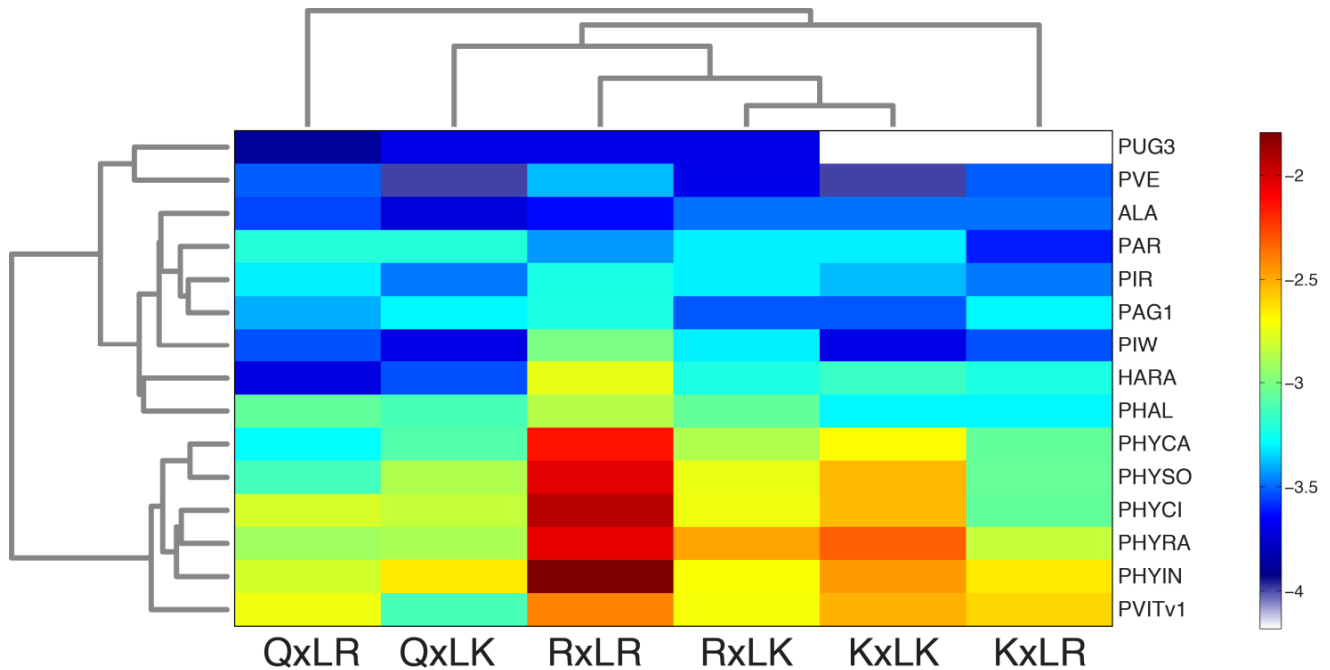

**Supplementary Figure S18.** Clustering of the motif abundances for RxLR-like where the occurrence of the motif is associated to a signal peptide prediction (with no constraints on their relative position or the presence of additional motifs).

We normalized the counts for an organism by the total number  $N$  of proteins assigned to orthologous groups by Inparanoid for that organism. We applied this normalization because it is much more robust to differences in the gene prediction methods than the raw number of proteins in a draft genome that can be partial or comprise many putative proteins, as in the *P. viticola* case (see Supplementary Fig. S12). Plotted values are  $\log_{10}$  of the ratio among the motif counts and  $N$ , standardized by row. The clustering of the rows defines two groups: RxLR-rich and RxLR-poor organisms, respectively. In more or less all organisms the preferred motif is the RxLR, but other motifs can be abundant as well, especially in organisms where this is not expected, as the *Phytophthora*, where the focus has been mainly on RxLR proteins and nothing is known about the putative effectors with variant motifs. The two *Plasmopara* species behave quite differently. *P. viticola* is placed in the RxLR-rich group; *P. halstedii* is instead placed in the effector-poor group, mainly for the presence of a small number of canonical RxLR. Distance used for the clustering was the Euclidean, single-linkage clustering method. (PHAL: *Plasmopara halstedii*, ALA: *Albugo laibachii*, PVE: *Pythium vexans*, PHYSO: *Phytophthora sojae*, PHYRA: *Phytophthora ramorum*, PHYCI: *Phytophthora cinnamomi*, PHYIN: *Phytophthora infestans*, PHYCA: *Phytophthora capsici*, PIR: *Pythium irregulare*, PIW: *Pythium iwayamai*, PAG1: *Pythium aphanidermatum*, PAR: *Pythium arrhenomanes*, PUG3: *Pythium ultimum*, HARA: *Hyaloperonospora arabidopsidis*, PVIT: *Plasmopara viticola*).

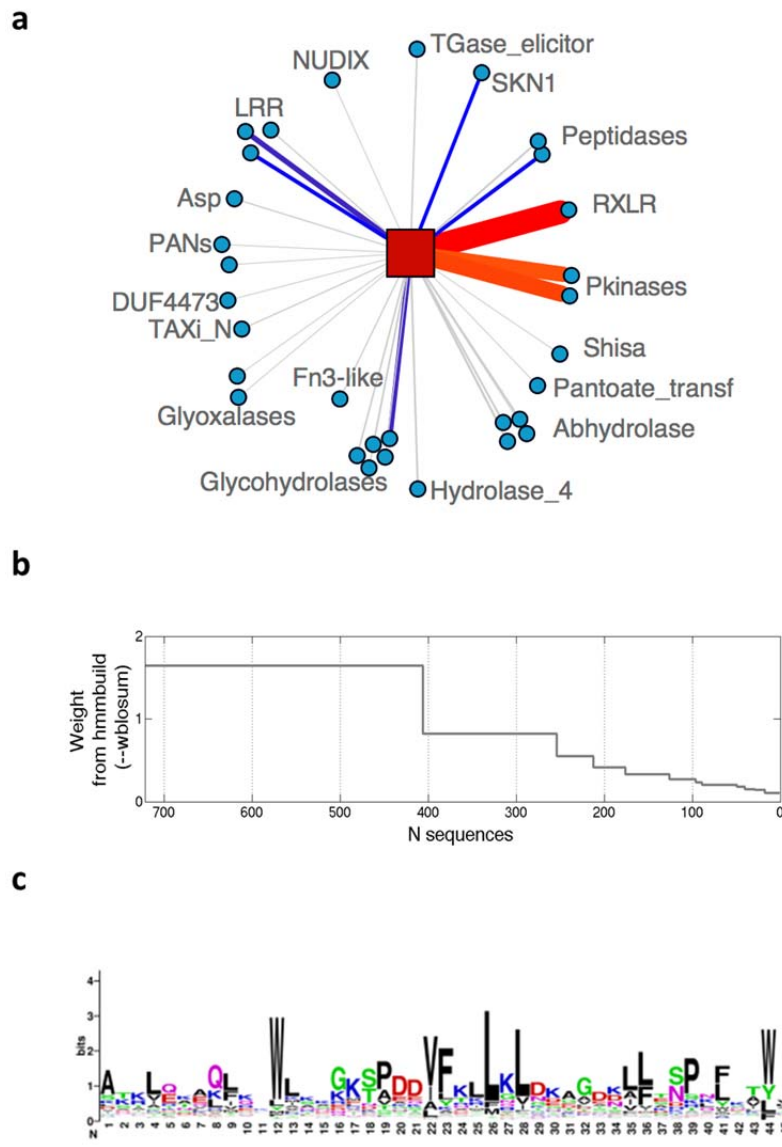

### Supplementary Figure S19. Graphical representations of the occurrences of Pfam domains in RxLR-like proteins.

A total of 1,182 RxLR-like proteins possessing a signal peptide and the variants associated to an EER were considered (**Supplementary Table S10**) and indicated in **(a)** with a red square. Only 387 proteins have a hit in the Pfam database at the threshold used ( $e\text{-value} \leq 0.0001$ ), confirming that most of the putative RxLR proteins have no known domains. Pfam does not contain a model for the well-known WY domain of RxLR proteins. We built it from 721 WY domains annotated in Boutemy *et al.*<sup>40</sup> by using hmmbuild and weighting sequences using the Henikoff simple filter (`--wblsum`)**(b)**. The corresponding sequence logo is shown in **(c)**. We found that the WY domain is present in 368 sequences out of 721 ( $e\text{-value} \leq 0.0001$ ). The RXLR\_pfam (PF16810) domain is able to recover only 70 of these proteins. The input regexp-defined RxLR from *Phytophthora* is much higher, therefore the RxLR HMM is not able to detect a significant number of RxLR proteins, even in the genome of species used to build the model. This confirms that the RxLR are rapidly evolving, both in terms of sequence divergence and of domain arrangements.



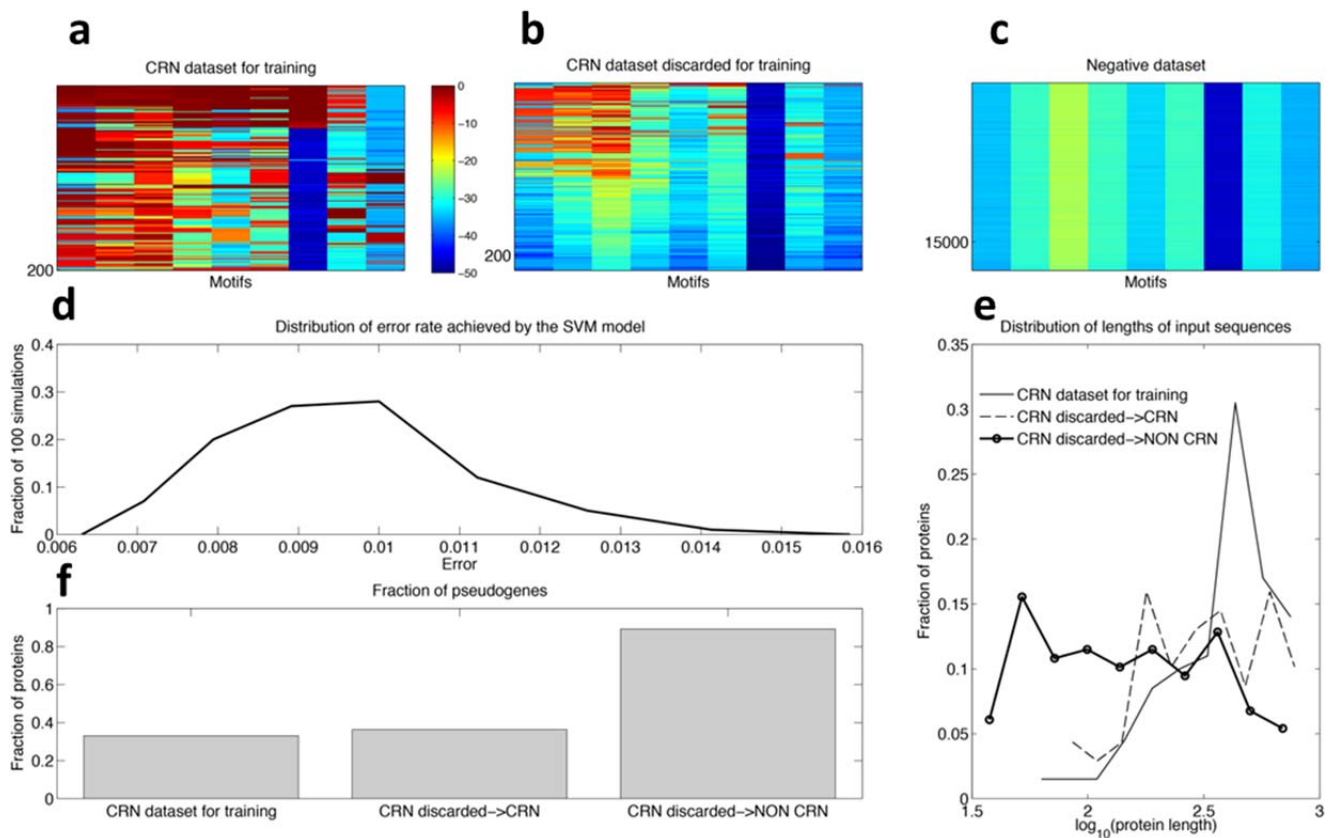

**Supplementary Figure S21.** Crinkler classification using SVM.

**a**, **b** and **c** are the input  $\log_{10}$  probability matrices for motifs. Each column corresponds to a motif of length 30 found by MEME. Each row corresponds to a *P. infestans* protein sequence. **d**) The error distribution was estimated using 100 cross validations for each of 100 different training sets, as explained in the supplementary note. The SVM model returned a wrong classification for most of the CRN not used for training. We explored this issue in more detail and we concluded that their classification is very difficult because they are often pseudogenes missing portions of the sequence containing the motifs used for the classification. **e**) length distributions of the proteins from the starting dataset of Crinkler proteins, partitioned into three classes: the 200 proteins used for training the models, the 69 Crinkler proteins not used for training and correctly classified by the SVM model and the 148 Crinkler proteins missed by the algorithm. Proteins with wrong classification by the SVM tend to be shorter than the remaining and they likely miss motifs/domains that might be important for classification. **f**) The fraction of proteins annotated as pseudogenes in the three groups defined above, showing that over 80% of the proteins of the non-identified CRNs are indeed annotated as pseudogenes.

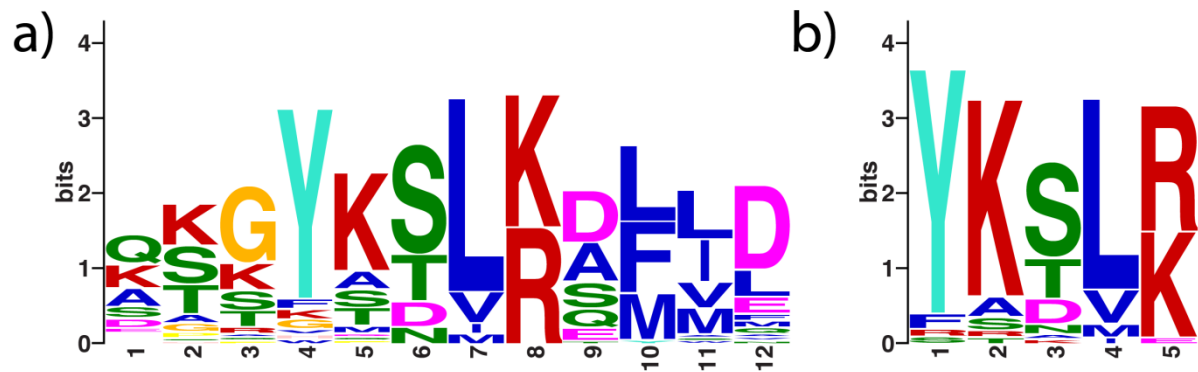

**Supplementary Figure S22.** Sequence logo of the YxSLK motif found by MEME in all *Pythium ultimum* “Family 3” proteins.

The surrounding region is also shown. **a)** When asking MEME for motifs ranging from 4 to 12 residues (ranking 6<sup>th</sup>). **b)** when asking MEME for motifs of width exactly 5 residues (ranking 9<sup>th</sup>). Sequence logos were produced by MEME<sup>30</sup>.

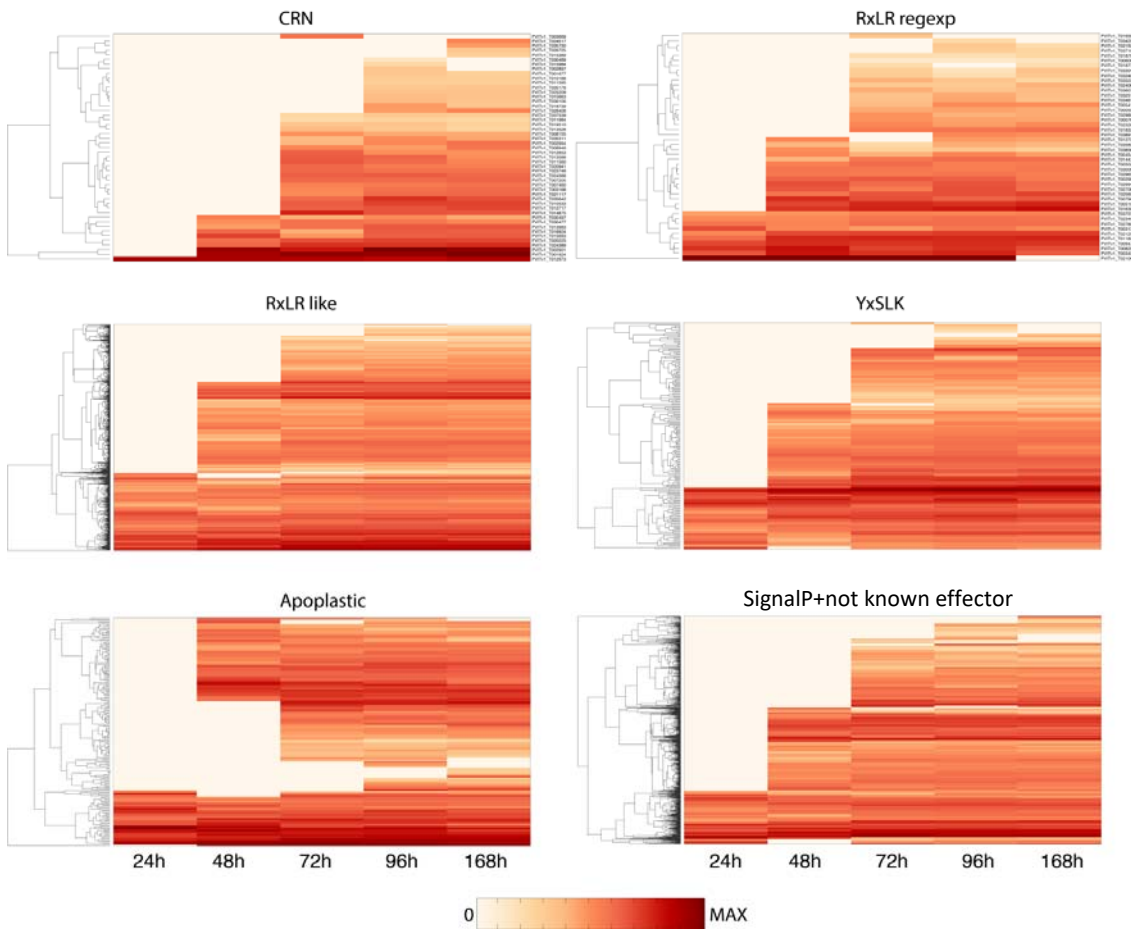

**Supplementary Figure S23:** Hierarchical clustering of effector gene expression profiles

Only transcripts for which we detected expression in at least one time point were plotted. Expression values in FPKM were log<sub>10</sub> transformed.

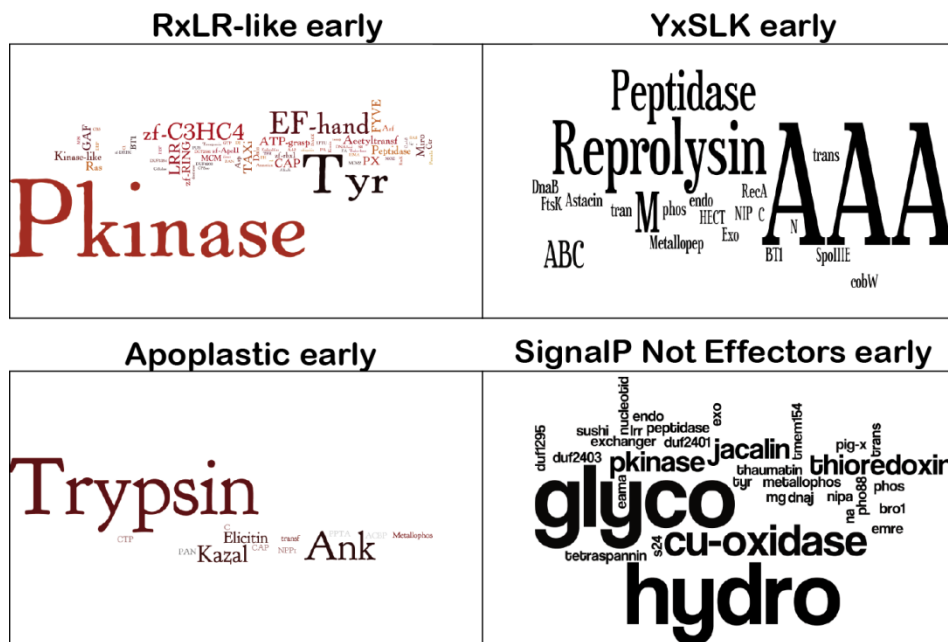

**Supplementary Figure S24.** Word cloud highlighting recurrent terms in protein domains found in *Plasmopara viticola* apoplastic, YxSLK and secreted proteins.

*P. viticola* genes having their maximum expression level at 24 hpi were searched against the pfamA database using hmmscan (using default parameters). The Pfam models with a significant hit (at domain e-value  $\leq 0.0001$ ) were used to build a word cloud to highlight the recurrent terms. For similar Pfam accessions, we remove the numeric code. Hydrolase and peptidase (trypsin, peptidase, reprolysin, Cu-oxidase, astacin...) functions are over-represented in the apoplastic, YxSLK and secreted proteins. All of these evidences indicate that *P. viticola* makes heavy deployment of degradative enzymes at the very beginning of the infection. The RxLR-like group is instead enriched in Protein kinase activity therefore suggesting that *P. viticola* also interfere with phosphorylation (cascades) in the plants.

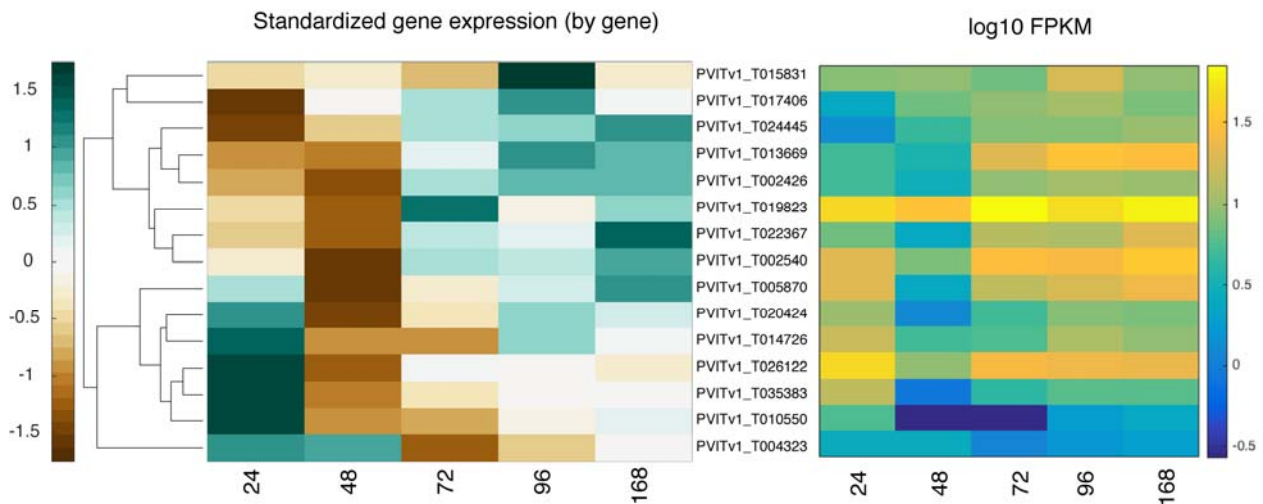

**Supplementary Figure S25.** Differential expression of 15 genes with a significant hit for the LRR Pfam model. On the left the row standardized matrix used for building the dendrogram, and on the right the actual FPKM values.

15 of the 111 genes with a significant hit for the LRR Pfam model in *P. viticola* are expressed at 24 hpi after infection and some of them have their maximum expression level at this stage. Two groups of sequences expressed at 24 hpi emerges: one with expression peak at 24 hpi that then are down regulated, and one with delayed expression that increases after 48 hpi.



Nitrogen metabolism pathway

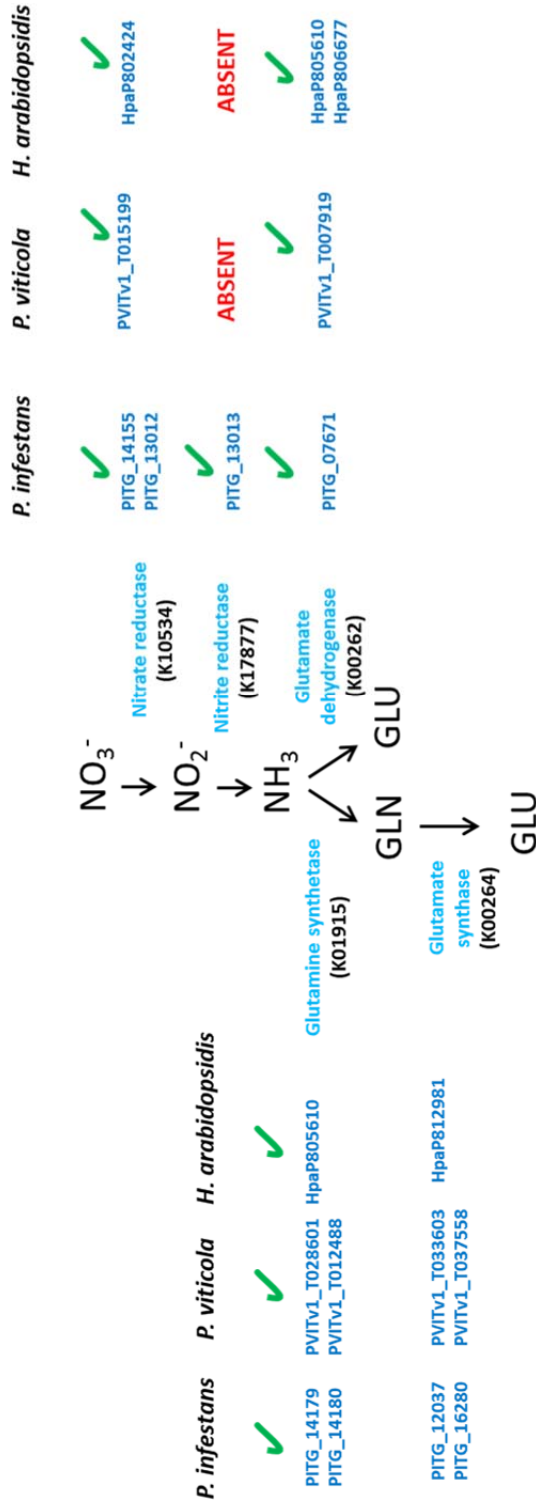

**Supplementary Figure S26.** Nitrogen metabolism pathway in *P. viticola*.

The gene ID number for the enzymes in this pathway in *P. viticola*, *P. infestans* (PITG), and *H. arabidopsidis* (Hpa) genomes are indicated. They are considered absent if not found in the respective genome assemblies.

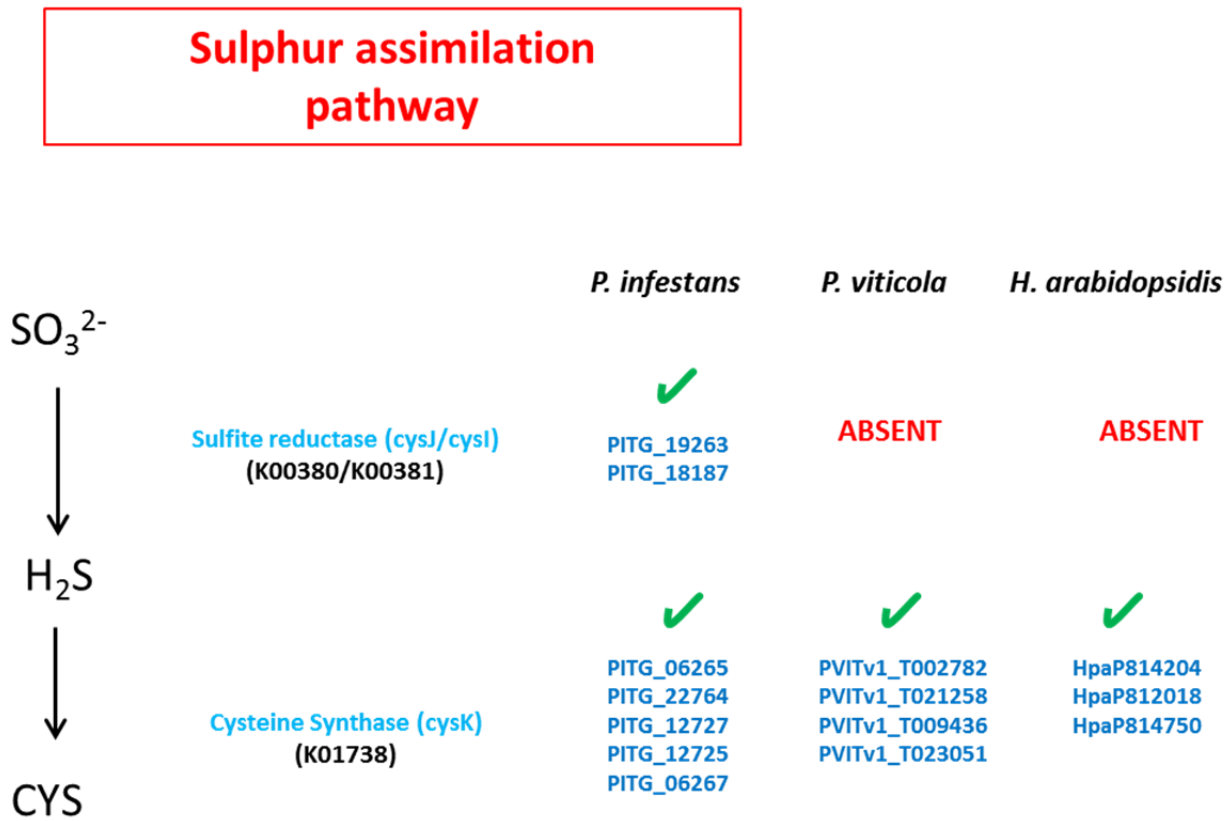

**Supplementary Figure S27.** Sulphur assimilation pathway in *P. viticola*.

The gene ID number for the enzymes in this pathway in *P. viticola*, *P. infestans* (PITG), and *H. arabidopsidis* (Hpa) genomes are indicated. They are considered absent if not found in the respective genome assemblies.

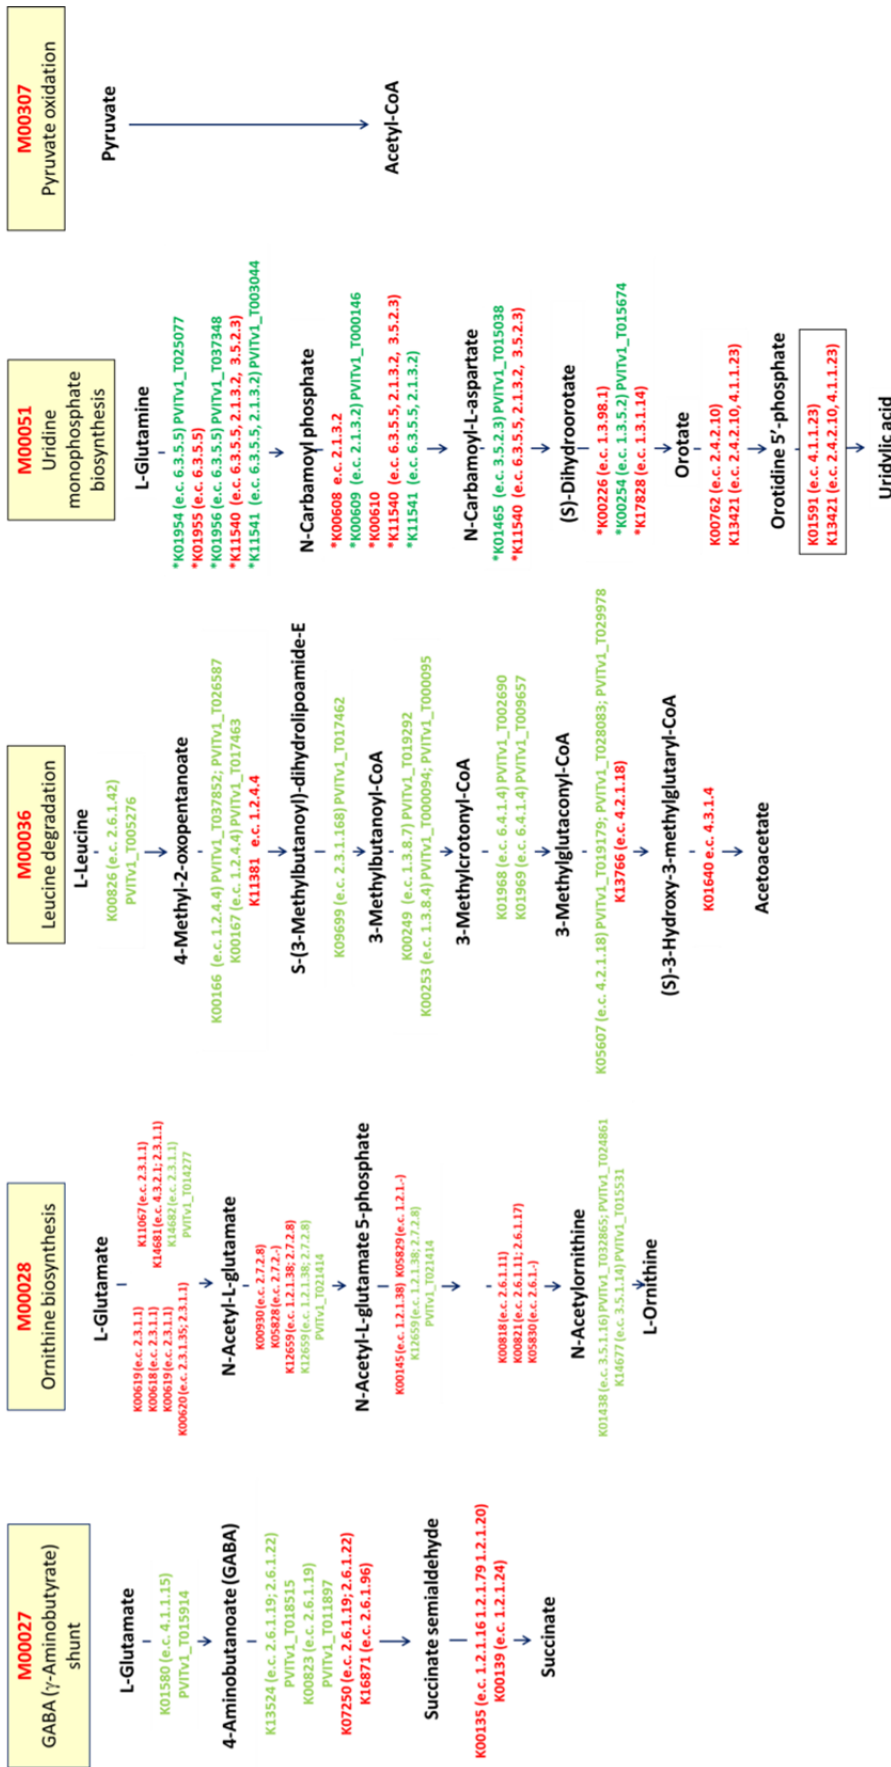

**Supplementary Figure S28.** Incomplete metabolic modules in *P. viticola*.

The enzymes present in *P. viticola* genome and the corresponding gene numbers are indicated in green. The enzymes missing are indicated in red.

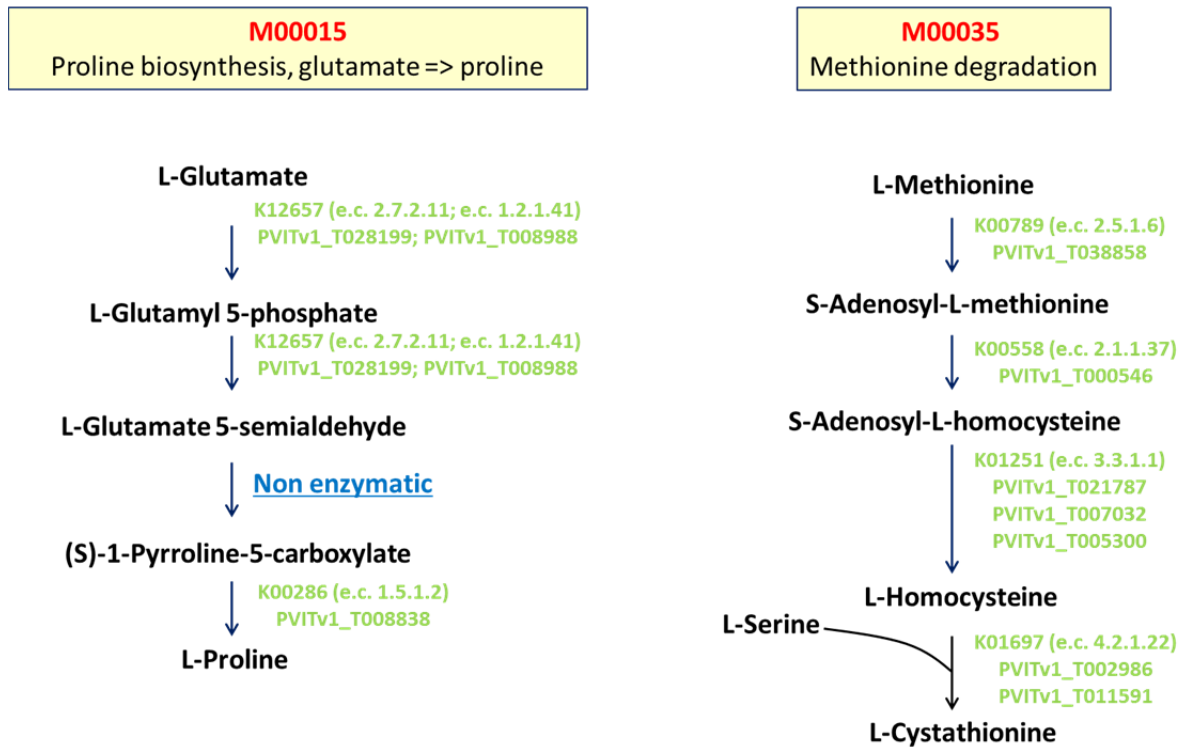

**Supplementary Figure S29.** Metabolic modules found in *P. viticola* but missing in *H. arabidopsidis* and *P. infestans*.

The enzymes present in *P. viticola* genome and the corresponding gene numbers are indicated in green.

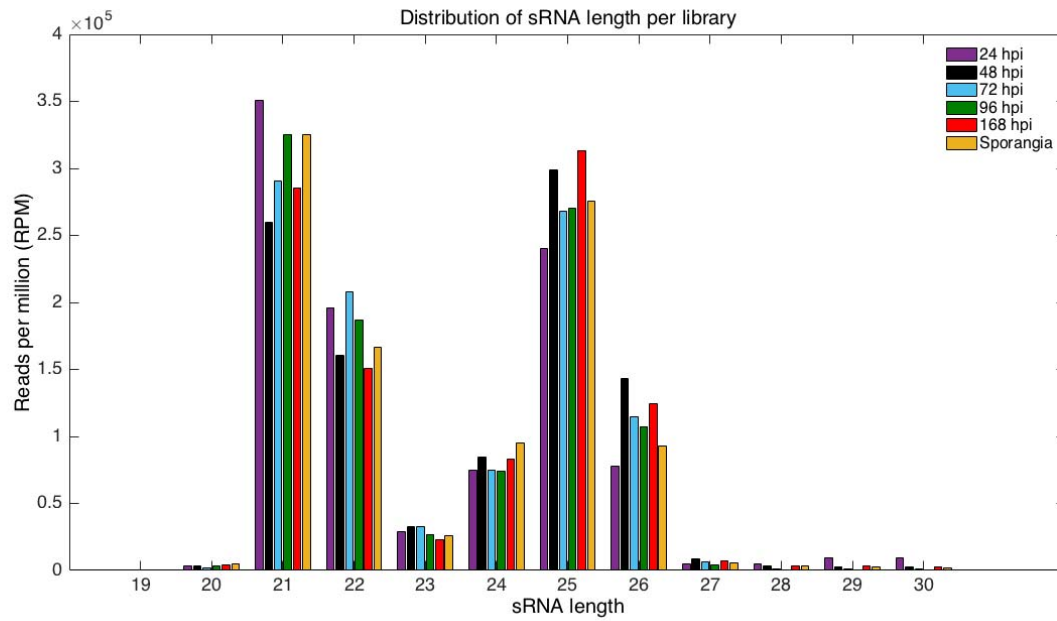

**Supplementary Figure S30.** Normalized (RPM) *P. viticola* small RNA read counts per library.

The normalized values in RPM were calculated from raw counts by multiplying raw counts by  $10^6/N$  where N is the total number of reads mapped on the *P. viticola* genome from the same library.

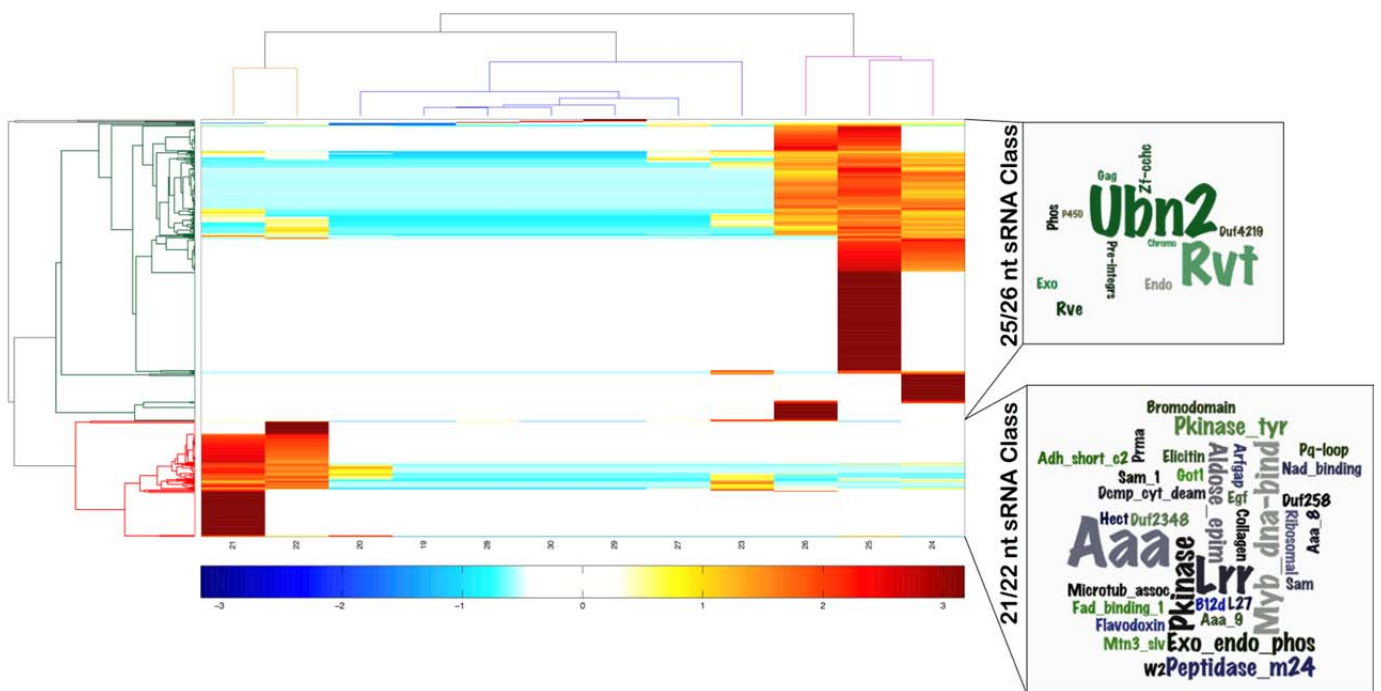

**Supplementary Figure S31.** General functions of genes generating sRNAs of different lengths in *P. viticola*.

Two well-defined groups of sequences are defined: one (highlighted in green) containing genes mainly associated with sRNAs of 24 to 26 nucleotides and another (in red) containing genes mainly associated with 21-22 nt long sRNAs. Pfam domains associated to the proteins in the clusters were retrieved and the list obtained was used to generate the word cloud using genes2WordCloud (<http://www.maayanlab.net/>). The green group is strongly enriched in Ubn2 (gag-polypeptide of LTR copia-type) and Rvt (Reverse transcriptase (RNA-dependent DNA polymerase)), while the red one is more heterogeneous and contains several different domains not related to mobile elements.

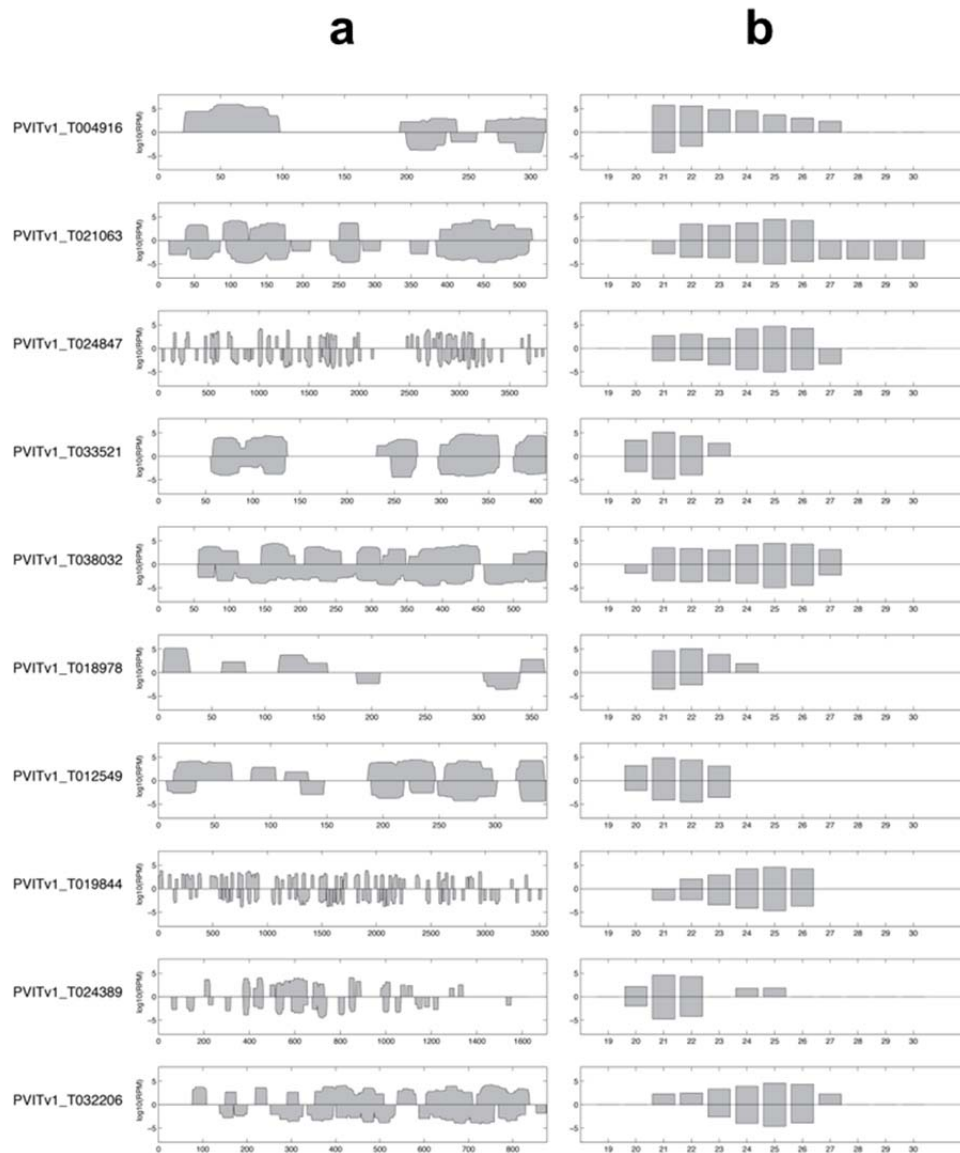

**Supplementary Figure S32:** Secondary sRNA coverage and length distribution plot of ten *P. viticola* genes producing sRNAs.

Plots in (a) correspond to the secondary sRNA coverage, expressed as  $\log_{10}$  of the RPMs for a certain nucleotide position, after summing the abundances of sRNAs of all lengths. Counts from different libraries were normalized to RPM values and then all RPMs were summed to give the plotted values. The RPMs of reads mapping on the complementary strand of the transcript are plotted after reversing the sign of the abundances. Plots in (b) are the length distributions of the corresponding sRNAs. sRNAs mapping on the negative strand are placed below the x-axis. PVITv1\_T004916, T024389 and T012549 have been previously identified as CRN effectors, which are confirmed as strong secondary sRNA producers, similar to what has been observed in *P. infestans*<sup>41</sup>. PVITv1\_T019844 is a pol-like protein, therefore related to transposable elements. The presence of sRNAs originating from both strands strongly suggests that these transcripts are first processed by RNA-dependent RNA polymerases and then likely sliced by a Dicer-like mechanism.

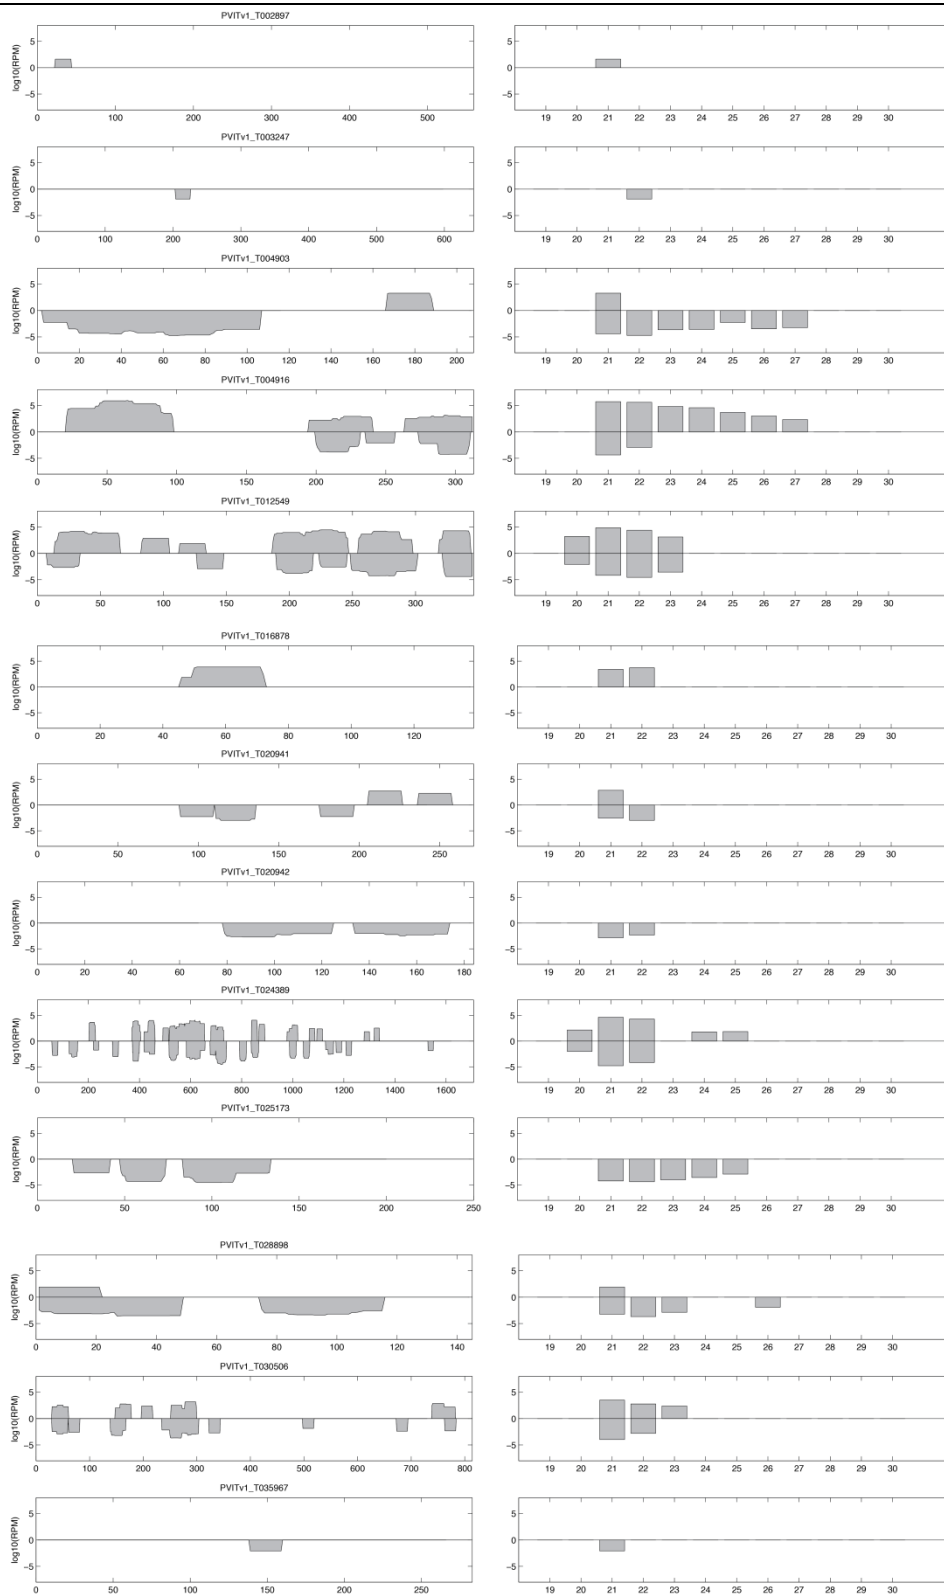

**Supplementary Figure S33.** Secondary sRNA coverage and length distribution of sRNAs produced by CRN genes.

The Crinkler genes are mostly associated with 21/22 nt long sRNAs. The secondary sRNA coverage is indicated on left panels, the length distributions on the right.



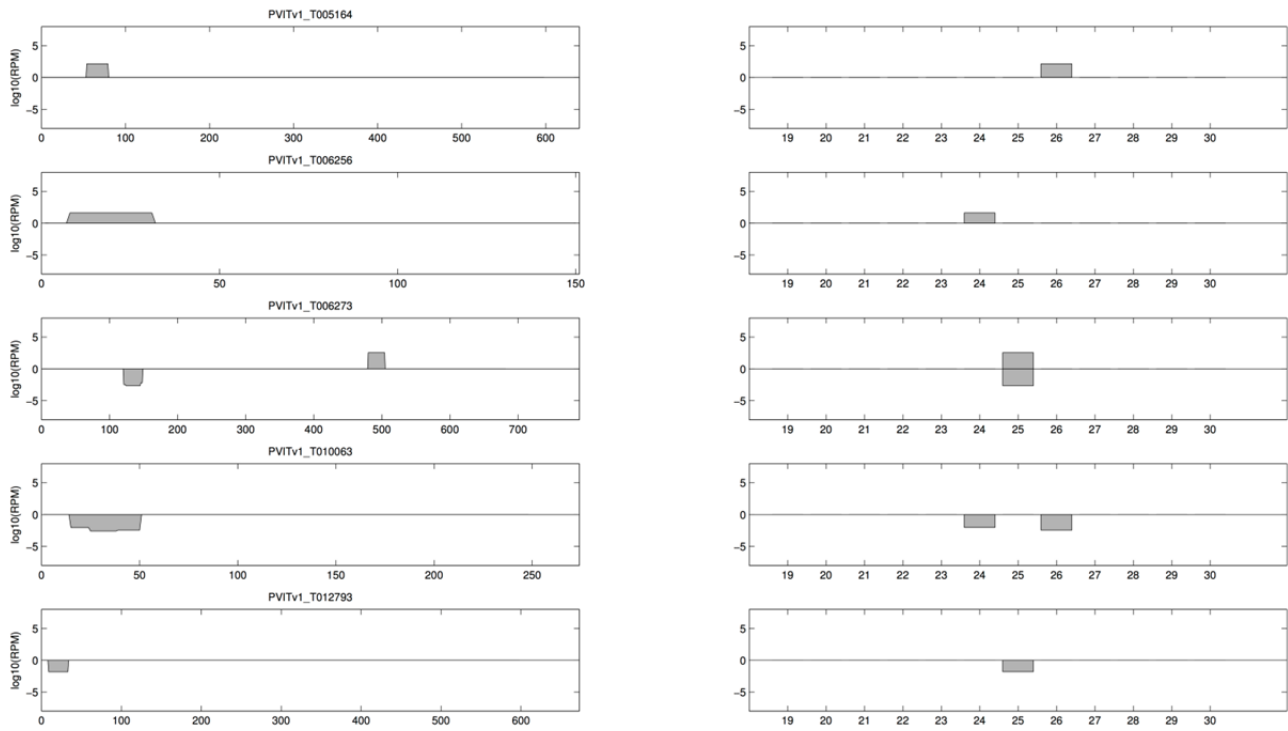

**Supplementary Figure S34.** Abundance and length distribution of secondary sRNAs produced by YxSLK effector genes.

The sRNA coverage is indicated on left panels, the length distributions on the right.

**a**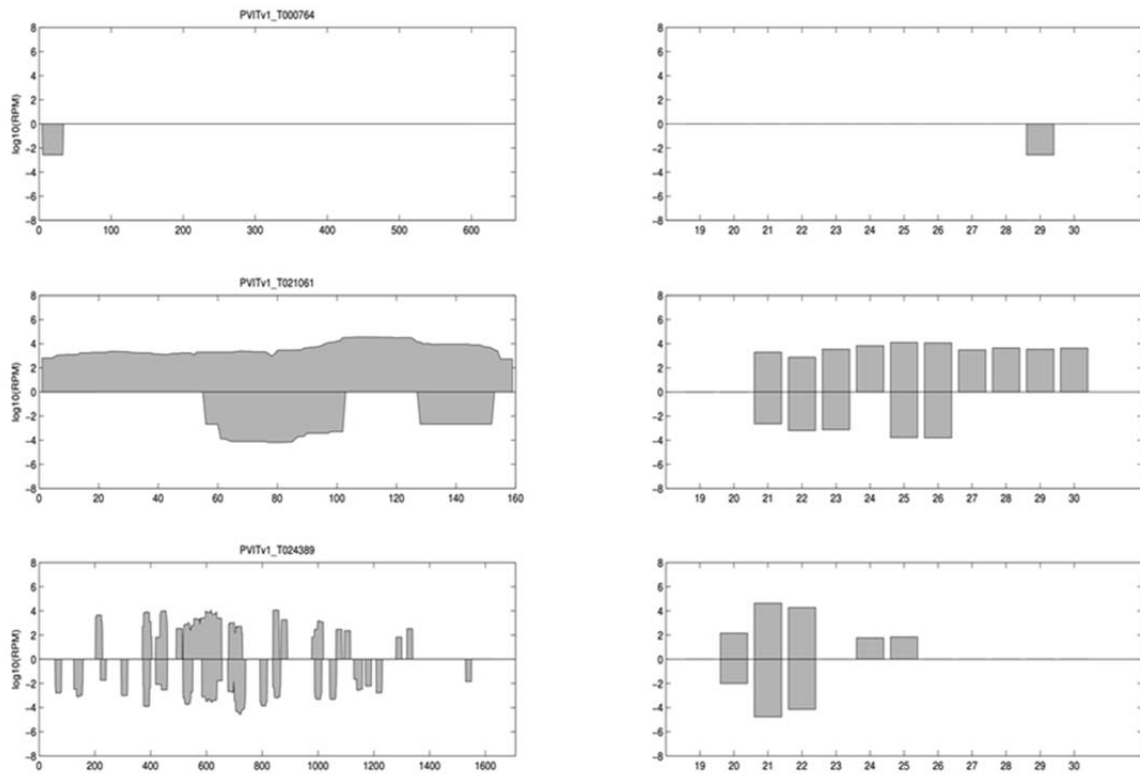**b**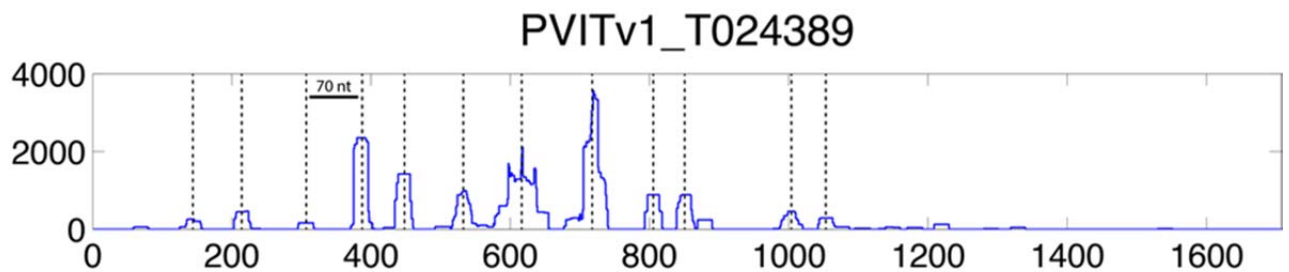

**Supplementary Figure S35.** sRNA coverage and length distribution of secondary sRNAs produced by RxLR effector genes.

The sRNA coverage is indicated on left panels, the length distributions on the right for the RxLR effector genes (a). PVITv1\_T024389 is an RxLR-like and the same time also a CRN, and has a peculiar pattern of sRNAs, almost only of 21/22 nt, with a periodicity of 40-60 nucleotides between consecutive peaks (b).

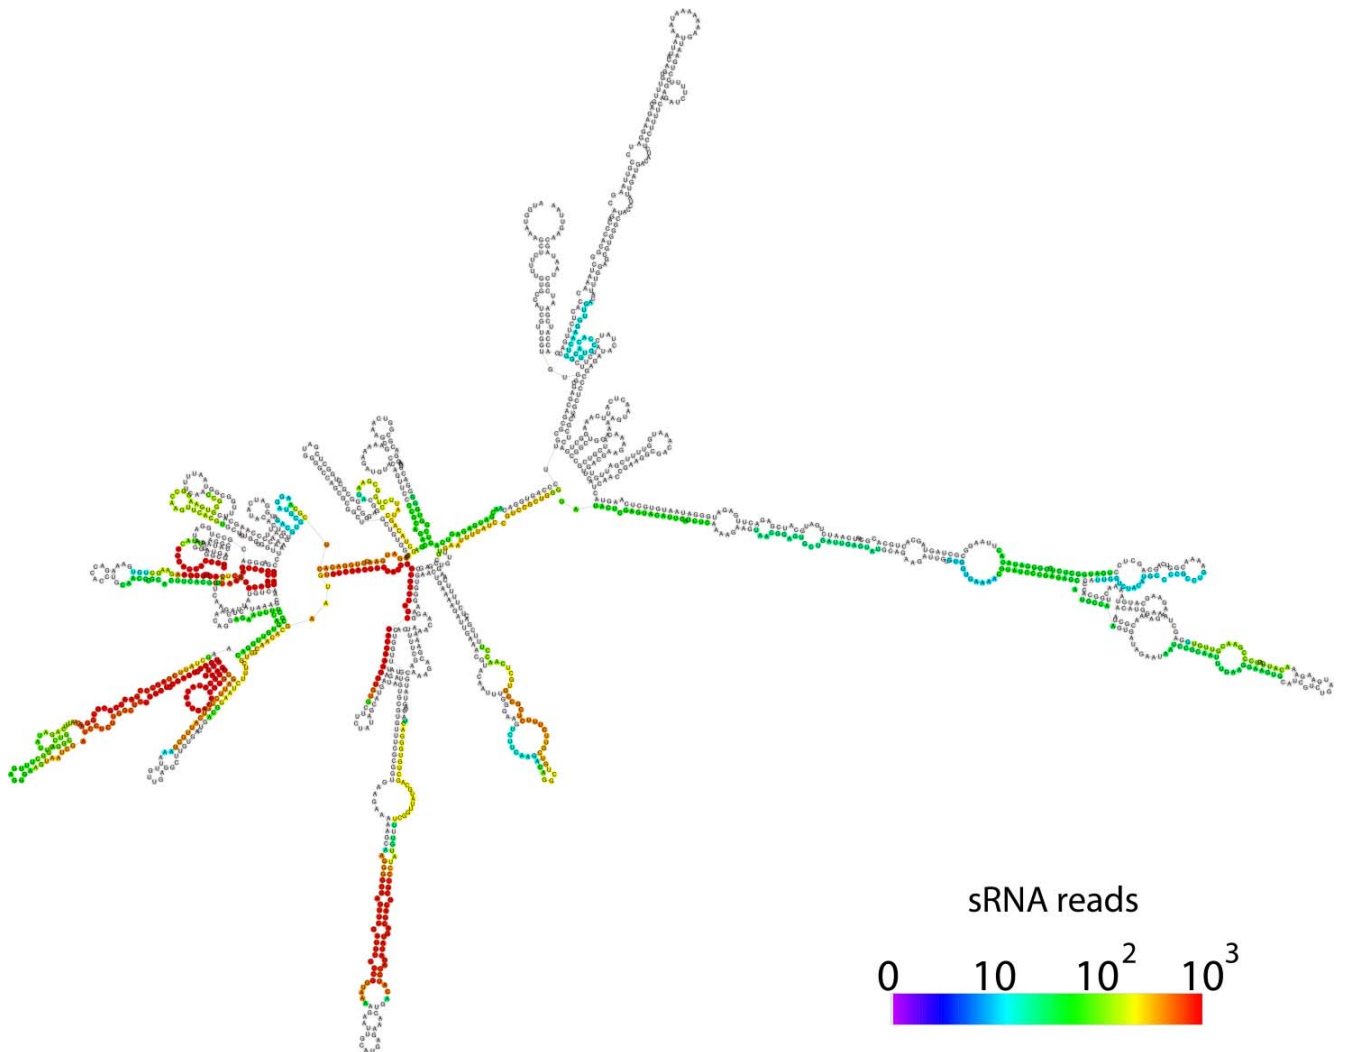

**Supplementary Figure S36.** RNA secondary structure of PVITv1\_T024389.

The hairpins were colored to indicate the sRNA coverage expressed as raw number of reads in all libraries. The secondary structure shows similarities to polycistronic sRNA precursor.

## Supplementary Tables

**Supplementary Table S1.** See attached Excel file “GO annotation of *P. viticola* proteome”.

**Supplementary Table S2.** Evaluation of performances of the preliminary and final Augustus parameters.

| Objective          | Sensitivity | Specificity |
|--------------------|-------------|-------------|
| <b>Preliminary</b> |             |             |
| Nucleotide (multi) | 0.97        | 0.745       |
| Exon (multi)       | 0.87        | 0.68        |
| Gene (multi)       | 0.755       | 0.465       |
| Nucleotide (mono)  | 0.999       | 0.826       |
| Exon (mono)        | 0.959       | 0.497       |
| Gene (mono)        | 0.94        | 0.61        |
| <b>Final</b>       |             |             |
| Nucleotide (multi) | 0.981       | 0.835       |
| Exon (multi)       | 0.838       | 0.713       |
| Gene (multi)       | 0.604       | 0.43        |
| Nucleotide (mono)  | 0.993       | 0.889       |
| Exon (mono)        | 0.864       | 0.557       |
| Gene (mono)        | 0.831       | 0.639       |

**Supplementary Table S3.** Counts of selected gene predictions.

|      | Predictions <sup>a</sup>                      | N             |
|------|-----------------------------------------------|---------------|
| L>50 | Supported                                     | 22,527        |
|      | Not supported                                 | 6,177         |
|      | <b>Total L&gt;50</b>                          | <b>28,704</b> |
| L<50 | Supported                                     | 6,393         |
|      | Not supported                                 | 51,939        |
|      | <b>Total (L&gt;0)</b>                         | <b>87,036</b> |
| L>30 | Supported                                     | 25,663        |
|      | Not supported                                 | 13,505        |
|      | Filtered (2 <sup>nd</sup> round) <sup>b</sup> | -870          |
|      | <b>Total L&gt;30</b>                          | <b>38,298</b> |

<sup>a</sup>The prediction is supposed “Supported” when there are evidences supporting the gene model, for instance, a significant alignment with proteins from oomycetes and/or with available transcripts built using cufflinks with our own RNA-Seq data. We used the L>30 dataset for all analyses. RNA-Seq data here refer to the pooled library and not the time-course.

<sup>b</sup> After a second round of filtering to remove potential contaminations, the final number of genes is 38,298.

**Supplementary Table S4.** Result of the RNAmmer run on *Plasmopara viticola* scaffolds.

| Gene | Scaffold       | Start | End  | Strand | First 2 Blast Hits (% identity) <sup>a</sup>                     |
|------|----------------|-------|------|--------|------------------------------------------------------------------|
| 5S   | Scaffold-25542 | 32    | 148  | +      | <i>Aphanomyces astaci</i> (96%), <i>Albugo laibachii</i> (96%)   |
| 28S  | Scaffold-7390  | 618   | 4268 | -      | <i>Phytophthora megasperma</i> (96%), <i>P. parasitica</i> (96%) |

<sup>a</sup> The first hits are always from *P. viticola* when taking into account partial alignments. The first hits from different species were obtained because the blast e-value is much smaller for these long alignments than for the short perfect matches shared with available *P. viticola* sequences (see also **Supplementary Table S5**).

**Supplementary Table S5.** Available 28S ribosomal RNA gene sequences were retrieved using as a query the predicted *Plasmopara viticola* 28S rRNA gene.

| Description                                            | Max score | Total score | Query cover<br>(scaffold-7390) | E value  | Id   | Accession  |
|--------------------------------------------------------|-----------|-------------|--------------------------------|----------|------|------------|
| P. vit. isolate AR 160 LSU rib. RNA gene, partial      | 1749      | 1749        | 22%                            | 0        | 100% | AY035524.2 |
| P. vit. strain TxI 28S rib. RNA gene, partial          | 1736      | 1736        | 21%                            | 0        | 100% | HM628762.1 |
| P. vit. strain TxIV 28S rib. RNA gene, partial         | 1687      | 1687        | 21%                            | 0        | 99%  | HM628770.1 |
| P. vit. strain MI 28S rib. RNA gene, partial           | 1674      | 1674        | 21%                            | 0        | 99%  | HM628772.1 |
| P. vit. LSU rib. RNA gene, partial                     | 1489      | 1489        | 18%                            | 0        | 99%  | AY273978.1 |
| P. vit. strain UASWS SG1 28S rib. RNA gene, complete   | 1417      | 1417        | 17%                            | 0        | 100% | EF426546.1 |
| P. vit. haplotype 6 28S rib. RNA gene, partial         | 1297      | 1297        | 16%                            | 0        | 100% | JF897850.1 |
| P. vit. strain 318 28S rib. RNA gene, partial          | 1291      | 1291        | 16%                            | 0        | 99%  | KM279688.1 |
| P. vit. strain 295 28S rib. RNA gene, partial          | 1291      | 1291        | 16%                            | 0        | 99%  | KM279686.1 |
| P. vit. isolate ZH1TZ 28S rib. RNA gene, partial       | 1291      | 1291        | 16%                            | 0        | 100% | KF160820.1 |
| P. vit. haplotype 5 28S rib. RNA gene, partial         | 1291      | 1291        | 16%                            | 0        | 99%  | JF897849.1 |
| P. vit. strain 307 28S rib. RNA gene, partial          | 1286      | 1286        | 16%                            | 0        | 100% | KM279687.1 |
| P. vit. isolate XT1CP 28S rib. RNA gene, partial       | 1286      | 1286        | 16%                            | 0        | 99%  | KF160829.1 |
| P. vit. isolate ZS2TZ 28S rib. RNA gene, partial       | 1284      | 1284        | 16%                            | 0        | 99%  | KF160821.1 |
| P. vit. isolate BX2FS 28S rib. RNA gene, partial       | 1280      | 1280        | 16%                            | 0        | 100% | KF160831.1 |
| P. vit. isolate SH4YQ 28S rib. RNA gene, partial       | 1275      | 1275        | 16%                            | 0        | 99%  | KF160846.1 |
| P. vit. haplotype 2 28S rib. RNA gene, partial         | 1264      | 1264        | 16%                            | 0        | 99%  | JF897853.1 |
| P. vit. isolate AR391 LSU rib. RNA gene, partial       | 1260      | 1260        | 15%                            | 0        | 100% | AY250173.1 |
| P. vit. haplotype 4 28S rib. RNA gene, partial         | 1253      | 1253        | 16%                            | 0        | 99%  | JF897855.1 |
| P. vit. haplotype 8 28S rib. RNA gene, partial         | 1253      | 1253        | 16%                            | 0        | 99%  | JF897852.1 |
| P. vit. haplotype 3 28S rib. RNA gene, partial         | 1247      | 1247        | 16%                            | 0        | 99%  | JF897854.1 |
| P. vit. haplotype 7 28S rib. RNA gene, partial         | 1247      | 1247        | 16%                            | 0        | 99%  | JF897851.1 |
| P. vit. isolate HV225 LSU rib. RNA gene, partial       | 1245      | 1245        | 15%                            | 0        | 99%  | AY250174.1 |
| P. vit. isolate XH4CP 28S rib. RNA gene, partial       | 1236      | 1236        | 16%                            | 0        | 99%  | KF160848.1 |
| P. vit. haplotype 1 28S rib. RNA gene, partial         | 1218      | 1218        | 16%                            | 0        | 98%  | JF897848.1 |
| P. vit. isolate CY5YQ 28S rib. RNA gene, partial       | 1214      | 1214        | 16%                            | 0        | 98%  | KF160838.1 |
| P. vit. isolate HM5YQ 28S rib. RNA gene, partial       | 1197      | 1197        | 16%                            | 0        | 98%  | KF160847.1 |
| P. vit. isolate CH4YQ 28S rib. RNA gene, partial       | 1181      | 1181        | 16%                            | 0        | 97%  | KF160837.1 |
| P. vit. isolate YB4YQ 28S rib. RNA gene, partial       | 970       | 970         | 16%                            | 0        | 92%  | KF160842.1 |
| P. vit. ITS 1, 5.8S rib. RNA gene, and ITS 2, complete | 246       | 246         | 3%                             | 1.00E-65 | 100% | DQ665668.1 |

Supplementary Table S6. *Plasmopara viticola* tRNA genes predicted by tRNAScan-SE.

| Scaffold#            | Start | End   | Score | Strand | Name         | Scaffold#         | Start | End   | Score | Strand | Name         |             |
|----------------------|-------|-------|-------|--------|--------------|-------------------|-------|-------|-------|--------|--------------|-------------|
| <b>Alanine</b>       |       |       |       |        |              |                   |       |       |       |        |              |             |
| 3448                 | 10676 | 10748 | 47.94 | +      | Ala_76_tRNA  | 5343              | 884   | 954   | 26.35 | -      | Glu_100_tRNA |             |
| 7207                 | 35    | 106   | 58.66 | -      | Ala_118_tRNA | 5343              | 129   | 201   | 58.3  | -      | Glu_101_tRNA |             |
| 8544                 | 296   | 368   | 66.08 | -      | Ala_125_tRNA | 5343              | 2775  | 2846  | 52.18 | -      | Glu_97_tRNA  |             |
| 9115                 | 1     | 72    | 42.76 | +      | Ala_131_tRNA | 5343              | 2414  | 2486  | 28.74 | -      | Glu_98_tRNA  |             |
| 12323                | 436   | 508   | 32.32 | +      | Ala_156_tRNA | 6287              | 364   | 436   | 50.79 | -      | Glu_113_tRNA |             |
| 13109                | 89    | 161   | 39.98 | +      | Ala_159_tRNA | 11147             | 385   | 456   | 38.53 | -      | Glu_140_tRNA |             |
| 15606                | 437   | 509   | 27.75 | +      | Ala_177_tRNA | 11147             | 10    | 82    | 67.83 | -      | Glu_141_tRNA |             |
| 19475                | 394   | 465   | 58.16 | -      | Ala_203_tRNA | 11385             | 277   | 349   | 47.6  | +      | Glu_145_tRNA |             |
| 24294                | 30    | 125   | 56.96 | -      | Ala_234_tRNA | 11694             | 375   | 447   | 57.56 | -      | Glu_151_tRNA |             |
| 32332                | 31    | 102   | 50.2  | +      | Ala_279_tRNA | 11694             | 1     | 73    | 67.82 | -      | Glu_152_tRNA |             |
| 33956                | 30    | 101   | 66.36 | -      | Ala_288_tRNA | 12198             | 325   | 396   | 45.05 | +      | Glu_154_tRNA |             |
| 40072                | 71    | 142   | 53.15 | -      | Ala_318_tRNA | 15598             | 202   | 270   | 32.76 | -      | Glu_176_tRNA |             |
| 42292                | 246   | 318   | 60.71 | -      | Ala_324_tRNA | 17072             | 356   | 428   | 52.4  | -      | Glu_192_tRNA |             |
| 43939                | 136   | 207   | 63.15 | -      | Ala_333_tRNA | 21668             | 607   | 679   | 40.65 | +      | Glu_221_tRNA |             |
| 45463                | 133   | 204   | 63.65 | +      | Ala_336_tRNA | 22433             | 340   | 411   | 58.11 | +      | Glu_226_tRNA |             |
| 47648                | 7     | 79    | 57.61 | -      | Ala_345_tRNA | 22881             | 402   | 470   | 36.3  | -      | Glu_228_tRNA |             |
| 50705                | 26    | 97    | 63.46 | -      | Ala_355_tRNA | 26305             | 665   | 737   | 58.81 | -      | Glu_242_tRNA |             |
| 51237                | 324   | 396   | 49.1  | -      | Ala_360_tRNA | 26305             | 358   | 430   | 46.55 | -      | Glu_243_tRNA |             |
| 58083                | 168   | 240   | 53.71 | -      | Ala_383_tRNA | 26305             | 50    | 122   | 47.73 | -      | Glu_244_tRNA |             |
| <b>Arginine</b>      |       |       |       |        |              |                   |       |       |       |        |              |             |
| 310                  | 18855 | 18926 | 30.32 | -      | Arg_14_tRNA  | 26716             | 1760  | 1831  | 37.95 | +      | Glu_247_tRNA |             |
| 16194                | 469   | 540   | 60.13 | -      | Arg_181_tRNA | 26716             | 2139  | 2206  | 53.66 | +      | Glu_248_tRNA |             |
| 17303                | 1     | 73    | 67.11 | -      | Arg_194_tRNA | 27798             | 380   | 452   | 50.49 | -      | Glu_253_tRNA |             |
| 20362                | 18    | 90    | 71.29 | -      | Arg_211_tRNA | 27798             | 73    | 145   | 50.93 | -      | Glu_254_tRNA |             |
| 20973                | 30    | 119   | 62.5  | -      | Arg_216_tRNA | 28119             | 80    | 152   | 61.51 | -      | Glu_257_tRNA |             |
| 21176                | 2     | 74    | 62.15 | +      | Arg_217_tRNA | 29909             | 6     | 78    | 50.98 | +      | Glu_264_tRNA |             |
| 21505                | 35    | 107   | 50.81 | -      | Arg_219_tRNA | 30523             | 237   | 309   | 53.13 | -      | Glu_268_tRNA |             |
| 21587                | 1     | 65    | 50.05 | +      | Arg_220_tRNA | 32925             | 336   | 408   | 50.9  | -      | Glu_282_tRNA |             |
| 21962                | 369   | 441   | 68.33 | +      | Arg_224_tRNA | 33239             | 276   | 348   | 68.38 | -      | Glu_283_tRNA |             |
| 26077                | 1     | 73    | 70.63 | +      | Arg_240_tRNA | 37879             | 322   | 388   | 37.09 | -      | Glu_305_tRNA |             |
| 31008                | 429   | 501   | 62.15 | -      | Arg_271_tRNA | 39604             | 405   | 477   | 44.71 | -      | Glu_313_tRNA |             |
| 33311                | 535   | 602   | 50.57 | -      | Arg_286_tRNA | 39604             | 24    | 96    | 58.47 | -      | Glu_314_tRNA |             |
| 34855                | 33    | 104   | 52.88 | -      | Arg_291_tRNA | 47415             | 10    | 82    | 41.81 | +      | Glu_342_tRNA |             |
| 1821                 | 147   | 218   | 58.86 | +      | Arg_32_tRNA  | 52979             | 19932 | 20005 | 32.19 | +      | Glu_368_tRNA |             |
| 42326                | 1     | 73    | 68.33 | -      | Arg_325_tRNA | 54055             | 10    | 82    | 53.96 | +      | Glu_373_tRNA |             |
| 1821                 | 10368 | 10439 | 42.37 | -      | Arg_34_tRNA  | 55385             | 572   | 644   | 64.07 | -      | Glu_377_tRNA |             |
| 47436                | 922   | 989   | 50.57 | -      | Arg_344_tRNA | 55385             | 139   | 210   | 63.55 | -      | Glu_378_tRNA |             |
| 48243                | 471   | 543   | 70.63 | +      | Arg_346_tRNA | 56546             | 219   | 290   | 44.98 | +      | Glu_380_tRNA |             |
| 48752                | 50    | 122   | 53.59 | -      | Arg_347_tRNA | 56686             | 290   | 358   | 45.92 | -      | Glu_381_tRNA |             |
| 58435                | 172   | 245   | 59.49 | +      | Arg_384_tRNA | 61488             | 124   | 195   | 56.43 | -      | Glu_392_tRNA |             |
| 61106                | 510   | 579   | 46.55 | +      | Arg_391_tRNA | <b>Glutamine</b>  |       |       |       |        |              | Gln_43_tRNA |
| 2234                 | 2996  | 3068  | 52.17 | -      | Arg_51_tRNA  | 2020              | 2565  | 2636  | 67.98 | -      | Gln_52_tRNA  |             |
| 2675                 | 2958  | 3030  | 71.29 | +      | Arg_62_tRNA  | 2250              | 2156  | 2227  | 27.02 | +      | Gln_188_tRNA |             |
| 3146                 | 1075  | 1147  | 75.82 | +      | Arg_72_tRNA  | 16924             | 385   | 456   | 59.83 | -      | Gln_189_tRNA |             |
| 3146                 | 1858  | 1930  | 75.82 | +      | Arg_73_tRNA  | 16924             | 217   | 288   | 44.66 | -      |              |             |
| 4549                 | 1     | 73    | 70.63 | +      | Arg_87_tRNA  | <b>Glycine</b>    |       |       |       |        |              | Gly_13_tRNA |
| <b>Asparagine</b>    |       |       |       |        |              |                   |       |       |       |        |              |             |
| 2306                 | 20985 | 21052 | 31.14 | +      | Asn_58_tRNA  | 294               | 19704 | 19775 | 54.18 | +      | Gly_24_tRNA  |             |
| 7207                 | 959   | 1029  | 63.94 | -      | Asn_117_tRNA | 1103              | 2930  | 3001  | 56.08 | +      | Gly_25_tRNA  |             |
| 11163                | 1700  | 1772  | 60.7  | -      | Asn_144_tRNA | 1103              | 3821  | 3893  | 52.17 | +      | Gly_26_tRNA  |             |
| 16759                | 1     | 64    | 51.1  | -      | Asn_186_tRNA | 1103              | 4177  | 4248  | 64.44 | +      | Gly_27_tRNA  |             |
| 19481                | 558   | 630   | 78.23 | -      | Asn_204_tRNA | 1821              | 10693 | 10764 | 55.03 | -      | Gly_33_tRNA  |             |
| 24235                | 837   | 909   | 70.86 | +      | Asn_232_tRNA | 4721              | 3425  | 3505  | 30.5  | -      | Gly_92_tRNA  |             |
| <b>Aspartic acid</b> |       |       |       |        |              |                   |       |       |       |        |              |             |
| 2207                 | 1750  | 1822  | 59.25 | -      | Asp_48_tRNA  | 5873              | 23    | 93    | 49.44 | +      | Gly_106_tRNA |             |
| 19557                | 367   | 438   | 66.24 | -      | Asp_205_tRNA | 6287              | 1134  | 1206  | 54.59 | -      | Gly_111_tRNA |             |
| <b>Cysteine</b>      |       |       |       |        |              |                   |       |       |       |        |              |             |
| 2890                 | 421   | 492   | 45.29 | +      | Cys_71_tRNA  | 11158             | 233   | 304   | 42.97 | +      | Gly_142_tRNA |             |
| 5548                 | 3205  | 3276  | 67.58 | +      | Cys_105_tRNA | 20437             | 116   | 186   | 56.99 | -      | Gly_212_tRNA |             |
| 8439                 | 676   | 747   | 68.73 | +      | Cys_123_tRNA | 21909             | 125   | 196   | 62.38 | +      | Gly_223_tRNA |             |
| 14797                | 226   | 296   | 50.23 | -      | Cys_171_tRNA | 32410             | 187   | 258   | 56.47 | -      | Gly_280_tRNA |             |
| 16297                | 8     | 79    | 69.92 | -      | Cys_182_tRNA | 41282             | 221   | 292   | 60.7  | +      | Gly_322_tRNA |             |
| 23457                | 3     | 74    | 73.15 | -      | Cys_229_tRNA | 50086             | 12    | 90    | 20.04 | +      | Gly_353_tRNA |             |
| 31320                | 61    | 132   | 49.86 | -      | Cys_273_tRNA | 53847             | 220   | 290   | 46.28 | +      | Gly_372_tRNA |             |
| 31602                | 62    | 134   | 66.47 | -      | Cys_276_tRNA | 60152             | 1     | 68    | 42.08 | +      | Gly_390_tRNA |             |
| 39540                | 2     | 73    | 68.96 | -      | Cys_311_tRNA | <b>Histidine</b>  |       |       |       |        |              | His_15_tRNA |
| 51690                | 1282  | 1353  | 47.84 | -      | Cys_362_tRNA | 324               | 22    | 93    | 51.84 | +      | His_137_tRNA |             |
| 51690                | 995   | 1066  | 57.27 | -      | Cys_363_tRNA | 10592             | 9     | 80    | 29.42 | +      |              |             |
| <b>Glutamic acid</b> |       |       |       |        |              |                   |       |       |       |        |              |             |
| 2151                 | 117   | 189   | 40.51 | -      | Glu_44_tRNA  | <b>Isoleucine</b> |       |       |       |        |              | Ile_16_tRNA |
| 2207                 | 2057  | 2129  | 54.27 | -      | Glu_47_tRNA  | 357               | 29390 | 29463 | 75.2  | +      | Ile_17_tRNA  |             |
| 2207                 | 860   | 932   | 44.61 | -      | Glu_49_tRNA  | 357               | 31907 | 31980 | 69.47 | -      | Ile_190_tRNA |             |
| 2207                 | 129   | 201   | 52.24 | -      | Glu_50_tRNA  | 2485              | 359   | 444   | 34.02 | +      | Ile_59_tRNA  |             |
|                      |       |       |       |        |              | 8679              | 2506  | 2578  | 69.26 | +      | Ile_128_tRNA |             |
|                      |       |       |       |        |              | 16045             | 245   | 317   | 51.69 | +      | Ile_179_tRNA |             |
|                      |       |       |       |        |              | 16045             | 737   | 809   | 52.6  | +      | Ile_180_tRNA |             |
|                      |       |       |       |        |              | 16970             | 211   | 283   | 64.48 | +      | Ile_190_tRNA |             |
|                      |       |       |       |        |              | 22494             | 120   | 192   | 69.03 | +      | Ile_227_tRNA |             |
|                      |       |       |       |        |              | 27809             | 190   | 262   | 58.97 | -      | Ile_255_tRNA |             |

Table S6. continued

| Scaffold#            | Start | End   | Score | Strand | Name         | Scaffold#             | Start | End   | Score | Strand | Name         |
|----------------------|-------|-------|-------|--------|--------------|-----------------------|-------|-------|-------|--------|--------------|
| 38367                | 62    | 134   | 61.1  | +      | Ile_309_tRNA | 52413                 | 4     | 75    | 66.7  | -      | Pro_364_tRNA |
| 42609                | 201   | 273   | 56.25 | -      | Ile_326_tRNA | <b>Selenocysteine</b> |       |       |       |        |              |
| 53251                | 1     | 64    | 45.17 | -      | Ile_369_tRNA |                       | 48832 | 93    | 164   | 64.15  | +            |
| 59892                | 252   | 323   | 54.19 | -      | Ile_389_tRNA | <b>Serine</b>         |       |       |       |        |              |
| <b>Leucine</b>       |       |       |       |        |              | 60                    | 10866 | 10945 | 35.08 | +      | Ser_1_tRNA   |
| 60                   | 15630 | 15710 | 34.7  | -      | Leu_4_tRNA   | 60                    | 13215 | 13295 | 47.47 | +      | Ser_2_tRNA   |
| 87                   | 523   | 603   | 53.24 | -      | Leu_7_tRNA   | 60                    | 14228 | 14308 | 43.34 | +      | Ser_3_tRNA   |
| 433                  | 3756  | 3836  | 35.79 | +      | Leu_18_tRNA  | 69                    | 6392  | 6472  | 56.73 | +      | Ser_6_tRNA   |
| 3309                 | 2317  | 2402  | 36.03 | +      | Leu_74_tRNA  | 103                   | 13192 | 13272 | 30.63 | -      | Ser_9_tRNA   |
| 4067                 | 3497  | 3578  | 42.34 | +      | Leu_81_tRNA  | 262                   | 10002 | 10078 | 25.59 | +      | Ser_12_tRNA  |
| 4380                 | 1646  | 1727  | 47.31 | -      | Leu_86_tRNA  | 2890                  | 136   | 208   | 33.49 | +      | Ser_70_tRNA  |
| 8270                 | 426   | 510   | 45.76 | -      | Leu_122_tRNA | 4721                  | 20836 | 20916 | 53.78 | -      | Ser_90_tRNA  |
| 13562                | 505   | 586   | 51.82 | +      | Leu_161_tRNA | 4730                  | 4623  | 4703  | 48.02 | -      | Ser_94_tRNA  |
| 17280                | 554   | 635   | 44.94 | +      | Leu_193_tRNA | 5171                  | 365   | 444   | 47.18 | -      | Ser_96_tRNA  |
| 17506                | 168   | 247   | 50.08 | -      | Leu_195_tRNA | 5912                  | 1836  | 1915  | 46.48 | +      | Ser_109_tRNA |
| 28962                | 256   | 341   | 29.85 | +      | Leu_260_tRNA | 7581                  | 1054  | 1134  | 69.12 | +      | Ser_119_tRNA |
| 31987                | 196   | 277   | 53.8  | -      | Leu_277_tRNA | 7799                  | 218   | 303   | 60.46 | +      | Ser_120_tRNA |
| 33531                | 168   | 249   | 39.83 | -      | Leu_287_tRNA | 8925                  | 696   | 776   | 69.9  | +      | Ser_129_tRNA |
| 35213                | 242   | 327   | 34.54 | -      | Leu_293_tRNA | 11507                 | 281   | 360   | 63.63 | -      | Ser_147_tRNA |
| 36959                | 171   | 250   | 38.55 | -      | Leu_297_tRNA | 13575                 | 215   | 295   | 58.58 | +      | Ser_162_tRNA |
| 37234                | 520   | 601   | 50.55 | -      | Leu_299_tRNA | 14036                 | 2     | 82    | 62.04 | +      | Ser_164_tRNA |
| 37469                | 3     | 88    | 34.54 | -      | Leu_303_tRNA | 14036                 | 389   | 469   | 71.48 | +      | Ser_165_tRNA |
| 39789                | 278   | 357   | 55.11 | -      | Leu_315_tRNA | 20529                 | 1334  | 1407  | 39.02 | -      | Ser_213_tRNA |
| 40231                | 446   | 531   | 34.54 | -      | Leu_319_tRNA | 20529                 | 776   | 849   | 39.02 | -      | Ser_214_tRNA |
| 40984                | 164   | 243   | 44.08 | -      | Leu_321_tRNA | 20529                 | 218   | 291   | 39.02 | -      | Ser_215_tRNA |
| 43846                | 61    | 135   | 40.98 | -      | Leu_332_tRNA | 23843                 | 399   | 479   | 75.57 | -      | Ser_230_tRNA |
| 44929                | 220   | 301   | 53.96 | -      | Leu_335_tRNA | 26230                 | 166   | 246   | 54.47 | -      | Ser_241_tRNA |
| 46622                | 321   | 398   | 44.12 | -      | Leu_340_tRNA | 28062                 | 72    | 152   | 67.66 | -      | Ser_256_tRNA |
| 48793                | 53    | 132   | 42.91 | +      | Leu_348_tRNA | 29386                 | 388   | 460   | 33.22 | -      | Ser_263_tRNA |
| 53298                | 237   | 316   | 47.98 | -      | Leu_371_tRNA | 33254                 | 413   | 484   | 63.23 | -      | Ser_284_tRNA |
| 55112                | 219   | 298   | 43.6  | +      | Leu_376_tRNA | 38002                 | 56    | 135   | 64.53 | -      | Ser_306_tRNA |
| 59025                | 270   | 346   | 41.87 | +      | Leu_387_tRNA | 41364                 | 137   | 217   | 55.09 | -      | Ser_323_tRNA |
| <b>Lysine</b>        |       |       |       |        |              | 43076                 | 110   | 190   | 76.42 | +      | Ser_327_tRNA |
| 582                  | 5674  | 5746  | 67.51 | +      | Lys_20_tRNA  | 49083                 | 58    | 129   | 62.87 | -      | Ser_350_tRNA |
| 1366                 | 5386  | 5458  | 55.4  | -      | Lys_27_tRNA  | 49196                 | 1     | 78    | 54.56 | -      | Ser_351_tRNA |
| 3461                 | 4591  | 4662  | 64.25 | +      | Lys_77_tRNA  | 50852                 | 158   | 229   | 74.14 | -      | Ser_357_tRNA |
| 6287                 | 749   | 821   | 50.98 | -      | Lys_112_tRNA | <b>Stop</b>           |       |       |       |        |              |
| 6802                 | 292   | 363   | 73.45 | -      | Lys_116_tRNA | 20123                 | 267   | 339   | 58.91 | -      | Sup_209_tRNA |
| 8563                 | 516   | 587   | 59.75 | +      | Lys_127_tRNA | 54787                 | 90    | 176   | 37.34 | -      | Sup_375_tRNA |
| 13918                | 1708  | 1779  | 50.08 | -      | Lys_163_tRNA | <b>Threonine</b>      |       |       |       |        |              |
| 24755                | 103   | 175   | 65.22 | +      | Lys_236_tRNA | 5456                  | 4023  | 4094  | 67.03 | -      | Thr_103_tRNA |
| 27000                | 405   | 476   | 57.37 | -      | Lys_249_tRNA | 5456                  | 3777  | 3847  | 59.51 | -      | Thr_104_tRNA |
| 31567                | 210   | 282   | 64.23 | +      | Lys_274_tRNA | 6802                  | 608   | 679   | 47.42 | -      | Thr_115_tRNA |
| 34691                | 252   | 324   | 79.06 | +      | Lys_290_tRNA | 9072                  | 406   | 477   | 56.38 | -      | Thr_130_tRNA |
| 37018                | 33    | 105   | 77.58 | +      | Lys_298_tRNA | 9548                  | 628   | 699   | 76.55 | -      | Thr_132_tRNA |
| 39938                | 236   | 308   | 58.75 | -      | Lys_317_tRNA | 9548                  | 314   | 385   | 69.39 | -      | Thr_133_tRNA |
| 59621                | 262   | 323   | 43.74 | +      | Lys_388_tRNA | 9548                  | 1     | 67    | 56.27 | -      | Thr_134_tRNA |
| <b>Methionine</b>    |       |       |       |        |              | 10734                 | 199   | 270   | 61.38 | -      | Thr_138_tRNA |
| 2771                 | 2573  | 2645  | 49.84 | -      | Met_67_tRNA  | 11674                 | 1     | 61    | 36.54 | -      | Thr_150_tRNA |
| 2771                 | 2371  | 2443  | 66.96 | -      | Met_68_tRNA  | 13411                 | 337   | 408   | 61.33 | -      | Thr_160_tRNA |
| 6393                 | 601   | 673   | 74.9  | -      | Met_114_tRNA | 14827                 | 1     | 68    | 53.61 | +      | Thr_172_tRNA |
| 9650                 | 1911  | 1982  | 51.86 | -      | Met_135_tRNA | 15564                 | 486   | 557   | 53.44 | +      | Thr_174_tRNA |
| 15598                | 276   | 344   | 34.22 | -      | Met_175_tRNA | 15688                 | 448   | 514   | 64.24 | +      | Thr_178_tRNA |
| 18721                | 206   | 278   | 69.66 | -      | Met_201_tRNA | 16794                 | 39    | 110   | 74.6  | -      | Thr_187_tRNA |
| 18721                | 4     | 75    | 66.52 | -      | Met_202_tRNA | 22125                 | 1     | 65    | 46.3  | -      | Thr_225_tRNA |
| 25289                | 154   | 226   | 59.36 | +      | Met_237_tRNA | 30251                 | 508   | 580   | 68.15 | -      | Thr_266_tRNA |
| 25289                | 358   | 430   | 76.52 | +      | Met_238_tRNA | 30251                 | 213   | 284   | 69.3  | -      | Thr_267_tRNA |
| 25779                | 138   | 209   | 50.7  | -      | Met_239_tRNA | 36122                 | 68    | 138   | 57.19 | -      | Thr_295_tRNA |
| 27505                | 164   | 236   | 63.72 | +      | Met_251_tRNA | 37281                 | 247   | 318   | 68.28 | +      | Thr_301_tRNA |
| 29047                | 284   | 355   | 70.47 | +      | Met_261_tRNA | 37322                 | 162   | 233   | 65.64 | -      | Thr_302_tRNA |
| 29047                | 837   | 908   | 70.47 | +      | Met_262_tRNA | 37734                 | 129   | 200   | 72.76 | -      | Thr_304_tRNA |
| 35621                | 12    | 84    | 72.51 | +      | Met_294_tRNA | 43298                 | 129   | 200   | 69.83 | +      | Thr_328_tRNA |
| 37277                | 144   | 215   | 54.62 | -      | Met_300_tRNA | 43663                 | 393   | 464   | 72.49 | -      | Thr_329_tRNA |
| 38821                | 238   | 309   | 58.54 | +      | Met_310_tRNA | 43663                 | 81    | 152   | 65.02 | -      | Thr_330_tRNA |
| <b>Phenylalanine</b> |       |       |       |        |              | 45639                 | 677   | 741   | 46.3  | +      | Thr_337_tRNA |
| 150                  | 6164  | 6236  | 56.34 | +      | Phe_11_tRNA  | 45786                 | 236   | 307   | 70.4  | +      | Thr_338_tRNA |
| 4601                 | 6710  | 6782  | 57.76 | +      | Phe_88_tRNA  | 47185                 | 1     | 62    | 50.86 | -      | Thr_341_tRNA |
| 16350                | 74    | 146   | 64.5  | -      | Phe_183_tRNA | 53268                 | 1     | 67    | 56.24 | -      | Thr_370_tRNA |
| 27135                | 343   | 445   | 61.2  | +      | Phe_250_tRNA | <b>Tryptophan</b>     |       |       |       |        |              |
| 30575                | 233   | 310   | 31.35 | -      | Phe_269_tRNA | 11158                 | 589   | 659   | 48.75 | +      | Trp_143_tRNA |
| 31602                | 243   | 315   | 73.67 | -      | Phe_275_tRNA | 11670                 | 567   | 638   | 59.26 | -      | Trp_148_tRNA |
| 32202                | 87    | 173   | 35.69 | -      | Phe_278_tRNA | 16637                 | 163   | 234   | 64.55 | +      | Trp_185_tRNA |
| 36868                | 161   | 232   | 64.2  | -      | Phe_296_tRNA | 17047                 | 399   | 469   | 54.98 | -      | Trp_191_tRNA |
| 43843                | 607   | 676   | 57.19 | +      | Phe_331_tRNA | 30046                 | 323   | 394   | 74.55 | -      | Trp_265_tRNA |
| 57502                | 84    | 156   | 69.73 | +      | Phe_382_tRNA | <b>Tyrosine</b>       |       |       |       |        |              |
| <b>Proline</b>       |       |       |       |        |              | 982                   | 3893  | 3995  | 74.35 | +      | Tyr_22_tRNA  |
| 1949                 | 1419  | 1490  | 44.38 | +      | Pro_36_tRNA  | 19825                 | 209   | 311   | 48.27 | -      | Tyr_206_tRNA |
| 1949                 | 2367  | 2438  | 44.38 | +      | Pro_37_tRNA  | 21869                 | 77    | 157   | 58.67 | -      | Tyr_222_tRNA |
| 1949                 | 3414  | 3484  | 49.67 | +      | Pro_38_tRNA  | 24097                 | 50    | 152   | 42.39 | -      | Tyr_231_tRNA |
| 1949                 | 398   | 469   | 41.87 | -      | Pro_40_tRNA  | 28817                 | 273   | 332   | 38.8  | +      | Tyr_258_tRNA |
| 2579                 | 3405  | 3476  | 53.47 | -      | Pro_61_tRNA  | 30955                 | 6     | 108   | 73.08 | +      | Tyr_270_tRNA |
| 4254                 | 487   | 557   | 40.77 | +      | Pro_83_tRNA  | 31189                 | 77    | 136   | 31.22 | +      | Tyr_272_tRNA |
| 4254                 | 1171  | 1241  | 40.77 | +      | Pro_84_tRNA  | 34553                 | 77    | 136   | 37.3  | +      | Tyr_289_tRNA |
| 4254                 | 1482  | 1552  | 24.84 | +      | Pro_85_tRNA  | <b>Valine</b>         |       |       |       |        |              |
| 5873                 | 456   | 530   | 63.26 | -      | Pro_107_tRNA | 103                   | 13599 | 13671 | 52.42 | -      | Val_8_tRNA   |
| 5879                 | 9589  | 9667  | 25.52 | +      | Pro_108_tRNA | 103                   | 12737 | 12809 | 58.74 | -      | Val_10_tRNA  |
| 14125                | 1     | 65    | 55.06 | -      | Pro_168_tRNA | 1454                  | 11010 | 11082 | 63.72 | +      | Val_28_tRNA  |
| 18211                | 293   | 364   | 60.01 | +      | Pro_197_tRNA | 1593                  | 1155  | 1227  | 42.98 | +      | Val_29_tRNA  |
| 24249                | 400   | 471   | 70.89 | -      | Pro_233_tRNA | 1593                  | 1497  | 1568  | 56.06 | +      | Val_30_tRNA  |
| 24749                | 1     | 64    | 46.06 | +      | Pro_235_tRNA | 1593                  | 2089  | 2160  | 59.08 | +      | Val_31_tRNA  |
| 27682                | 511   | 582   | 59.67 | +      | Pro_252_tRNA | 3466                  | 134   | 204   | 51.51 | +      | Val_78_tRNA  |
| 28916                | 234   | 305   | 61.63 | -      | Pro_259_tRNA | 10787                 | 4381  | 4450  | 30.56 | -      | Val_139_tRNA |
| 32849                | 101   | 172   | 63.25 | -      | Pro_281_tRNA | 11434                 | 445   | 516   | 34.68 | +      | Val_146_tRNA |
| 33254                | 69    | 140   | 66.74 | -      | Pro_285_tRNA | 12269                 | 836   | 906   | 51.51 | -      | Val_155_tRNA |
| 39917                | 76    | 147   | 61.11 | -      | Pro_316_tRNA | 14065                 | 147   | 219   | 65.8  | -      | Val_167_tRNA |
| 50064                | 3     | 71    | 31.01 | -      | Pro_352_tRNA | 16361                 | 215   | 287   | 54.44 | -      | Val_184_tRNA |
| 51037                | 229   | 300   | 69.1  | -      | Pro_358_tRNA | 56115                 | 515   | 584   | 30.56 | +      | Val_379_tRNA |

**Supplementary Table S7.** List of species names and abbreviations for the organisms composing the “oomycetes dataset” used in the comparative analyses.

| Full Name                             | Abbre | Taxonomy ID | Full Taxonomy                                              |
|---------------------------------------|-------|-------------|------------------------------------------------------------|
| <i>Plasmopara viticola</i>            | PVIT  | 143451      | Stramenopiles; Oomycetes; Peronosporales; Peronosporaceae; |
| <i>Plasmopara halstedii</i>           | PHAL  | 4781        | Stramenopiles; Oomycetes; Peronosporales; Peronosporaceae; |
| <i>Hyaloperonospora arabidopsidis</i> | HARA  | 27295       | Stramenopiles; Oomycetes; Peronosporales; Peronosporaceae; |
| <i>Pythium aphanidermatum</i>         | PAG1  | 65070       | Stramenopiles; Oomycetes; Pythiales; Pythiaceae            |
| <i>Pythium arrhenomanes</i>           | PAR   | 82932       | Stramenopiles; Oomycetes; Pythiales; Pythiaceae            |
| <i>Pythium irregulare</i>             | PIR   | 36331       | Stramenopiles; Oomycetes; Pythiales; Pythiaceae            |
| <i>Pythium iwayamai</i>               | PIW   | 115417      | Stramenopiles; Oomycetes; Pythiales; Pythiaceae            |
| <i>Pythium ultimum</i>                | PUG3  | 65071       | Stramenopiles; Oomycetes; Pythiales; Pythiaceae            |
| <i>Pythium vexans</i>                 | PVE   | 42099       | Stramenopiles; Oomycetes; Pythiales; Pythiaceae            |
| <i>Phytophthora sojae</i>             | PHYS  | 67593       | Stramenopiles; Oomycetes; Peronosporales                   |
| <i>Phytophthora ramorum</i>           | PHYR  | 164328      | Stramenopiles; Oomycetes; Peronosporales                   |
| <i>Phytophthora capsici</i>           | PHYC  | 4784        | Stramenopiles; Oomycetes; Peronosporales                   |
| <i>Phytophthora infestans</i>         | PHYIN | 4787        | Stramenopiles; Oomycetes; Peronosporales                   |
| <i>Phytophthora cinnamomi</i>         | PHYCI | 4785        | Stramenopiles; Oomycetes; Peronosporales                   |
| <i>Albugo laibachii</i>               | ALA   | 653948      | Stramenopiles; Oomycetes; Albuginales; Albuginaceae        |

**Supplementary Table S8.** The 10 most represented KEGG categories in the core genome of the oomycetes.

| KEGG category                                      | Fraction <sup>a</sup> | N  |
|----------------------------------------------------|-----------------------|----|
| 01110 Biosynthesis of secondary metabolites        | 0.063                 | 43 |
| 03010 Ribosome                                     | 0.044                 | 30 |
| 01120 Microbial metabolism in diverse environments | 0.032                 | 22 |
| 03040 Spliceosome                                  | 0.026                 | 18 |
| 01200 Carbon metabolism                            | 0.025                 | 17 |
| 00230 Purine metabolism                            | 0.022                 | 15 |
| 01230 Biosynthesis of amino acids                  | 0.022                 | 15 |
| 00190 Oxidative phosphorylation                    | 0.021                 | 14 |
| 03013 RNA transport                                | 0.019                 | 13 |
| 00240 Pyrimidine metabolism                        | 0.018                 | 12 |

<sup>a</sup>One *P. viticola* protein per cluster was taken, the KEGG categories recorded and then counted for all of them. The fraction is calculated over the proteins with KEGG annotations (N=680 after excluding those mapped to very broad categories, e.g. Metabolism).



Supplementary Table S9. BUSCO analysis

| SPECIES                                      | Complete | Single copy | Duplicated | Fragmented | Complete + Fragmented | Missing | Number of eukaryote proteins |
|----------------------------------------------|----------|-------------|------------|------------|-----------------------|---------|------------------------------|
| <i>Phytophthora infestans</i>                | 93.00%   | 86.10%      | 6.90%      | 1.30%      | 94.30%                | 5.70%   | 303 <sup>a</sup>             |
| <i>Plasmopara halstedii</i>                  | 93.40%   | 90.80%      | 2.60%      | 3.00%      | 96.40%                | 3.60%   | 303 <sup>a</sup>             |
| <i>Plasmopara viticola</i> (Yin et al. 2017) | 84%      | 38%**       | 46%        | 6%         | 90%                   | 9.50%   | 429 <sup>b</sup>             |
| <i>Plasmopara viticola</i> (this work)       | 73.00%   | 70.00%      | 3.00%      | 14.20%     | 87.20%                | 12.80%  | 303 <sup>a</sup>             |

\*\* estimated, as Complete=Single Copy + Duplicated

<sup>a</sup> BUSCO version 3

<sup>b</sup> BUSCO version 1

Supplementary Table S10. Summary of the output of the search of occurrences of the two regular expressions R[A-Z]LR and [DE][DE][RK], for the RxLR and the often associated EER.

| Species <sup>a</sup> | R <sup>b</sup> | R+E <sup>c</sup> | R+E <sup>c</sup><br>(150) | S+R <sup>d</sup> | P Enrichment<br>S in R | S+R<br>(60) | S+R+E <sup>e</sup> | S+R+E <sup>e</sup><br>(60,150) |
|----------------------|----------------|------------------|---------------------------|------------------|------------------------|-------------|--------------------|--------------------------------|
| PVIT                 | 493            | 73               | 33                        | 31               | 1.37E-03               | 24          | 15                 | 12                             |
| ALA                  | 134            | 21               | 9                         | 17               | 8.51E-05               | 8           | 6                  | 1                              |
| HARA                 | 186            | 56               | 23                        | 38               | 2.41E-10               | 23          | 19                 | 9                              |
| PHYCA                | 356            | 142              | 40                        | 135              | 0.00E+00               | 70          | 66                 | 54                             |
| PHYCI                | 441            | 164              | 54                        | 149              | 0.00E+00               | 94          | 77                 | 60                             |
| PHYIN                | 430            | 206              | 37                        | 266              | 0.00E+00               | 200         | 158                | 140                            |
| PHYRA                | 271            | 117              | 31                        | 140              | 0.00E+00               | 58          | 67                 | 42                             |
| PHYSO                | 508            | 195              | 43                        | 246              | 0.00E+00               | 137         | 108                | 94                             |
| PAG1                 | 131            | 37               | 9                         | 45               | 0.00E+00               | 21          | 10                 | 1                              |
| PIR                  | 174            | 44               | 15                        | 50               | 1.78E-15               | 24          | 8                  | 0                              |
| PIW                  | 197            | 49               | 14                        | 54               | 0.00E+00               | 32          | 11                 | 7                              |
| PUG3                 | 207            | 55               | 14                        | 30               | 8.77E-07               | 16          | 8                  | 3                              |
| PVE                  | 115            | 23               | 10                        | 32               | 2.42E-10               | 7           | 7                  | 0                              |
| PAR                  | 146            | 33               | 15                        | 39               | 1.32E-13               | 16          | 6                  | 2                              |
| PHAL                 | 148            | 44               | 16                        | 29               | 1.01E-07               | 14          | 16                 | 7                              |

<sup>a</sup>PVIT: *Plasmopara viticola*, ALA: *Albugo laibachii*, HARA: *Hyaloperonospora arabidopsidis*, PHYCA: *Phytophthora capsici*, PHYCI: *Phytophthora cinnamomi*, PHYIN: *Phytophthora infestans*, PHYRA: *Phytophthora ramorum*, PHYSO: *Phytophthora sojae*, PAG1: *Pythium aphanidermatum*, PIR: *Pythium irregulare*, PIW: *Pythium iwayamai*, PUG3: *Pythium ultimum*, PVE: *Pythium vexans*, PAR: *Pythium arrhenomanes*, PHAL: *Plasmopara halstedii*.

<sup>b</sup>R indicates the number of RxLR occurrences

<sup>c</sup>E the number of EER occurrences (considered only when associated to the presence of an RxLR, indicated by R+E).

<sup>d</sup>S indicates the presence of a signal peptide for secretion as predicted by SignalP. Since the RxLR is often positionally constrained.

<sup>e</sup>We also counted how many times the occurrences are within certain ranges (indicated in parenthesis). For instance, column S+R+E (60,150) corresponds to the counts of proteins having the signal (S), the RxLR within 60 aa from the predicted cleavage site and and EER within 150 aa from the end of the RxLR. This is the most stringent definition and it is often adopted in *Phytophthora* genomic studies. All counts refer to RxLR occurrences with a p-value<0.05 calculated using shuffling of the protein sequences.

**Supplementary Table S11.** Focus on sequences with a single occurrence of the RxLR motif or one of its variants.

| <b>Species</b>           | <b>RxLR</b> | <b>RxLK</b> | <b>KxLR</b> | <b>KxLK</b> | <b>QxLR</b> | <b>QxLK</b> | <b>TOT</b> | <b>ALT/TOT<sup>a</sup></b> |
|--------------------------|-------------|-------------|-------------|-------------|-------------|-------------|------------|----------------------------|
| <i>A. laibachii</i>      | 1           | 0           | 0           | 0           | 1           | 0           | 2          | 0.50                       |
| <i>P. aphanidermatum</i> | 3           | 0           | 2           | 1           | 0           | 0           | 6          | 0.50                       |
| <i>P. arrhenomanes</i>   | 1           | 0           | 2           | 0           | 3           | 0           | 6          | 0.83                       |
| <i>P. irregulare</i>     | 3           | 1           | 0           | 1           | 4           | 0           | 9          | 0.67                       |
| <i>P. iwayamai</i>       | 9           | 0           | 0           | 1           | 2           | 0           | 12         | 0.25                       |
| <i>P. ultimum</i>        | 4           | 0           | 0           | 1           | 0           | 0           | 5          | 0.20                       |
| <i>P. vexans</i>         | 0           | 0           | 1           | 0           | 1           | 0           | 2          | 1.00                       |
| <i>P. capsicii</i>       | 71          | 8           | 0           | 4           | 2           | 0           | 85         | 0.16                       |
| <i>P. cinammomi</i>      | 80          | 14          | 5           | 2           | 3           | 0           | 104        | 0.23                       |
| <i>P. infestans</i>      | 189         | 14          | 4           | 3           | 8           | 0           | 218        | 0.13                       |
| <i>P. ramorum</i>        | 47          | 15          | 0           | 3           | 4           | 0           | 69         | 0.32                       |
| <i>P. sojae</i>          | 121         | 5           | 8           | 8           | 0           | 0           | 142        | 0.15                       |
| <i>P. halstedii</i>      | 2           | 5           | 1           | 2           | 0           | 0           | 10         | 0.80                       |
| <i>P. viticola FEM</i>   | 16          | 0           | 1           | 0           | 4           | 1           | 22         | 0.27                       |
| <i>H. arabidopsidis</i>  | 6           | 0           | 0           | 2           | 1           | 3           | 12         | 0.50                       |
| <b>TOT</b>               | <b>553</b>  | <b>62</b>   | <b>24</b>   | <b>28</b>   | <b>33</b>   | <b>4</b>    | <b>704</b> | <b>0.21</b>                |

<sup>a</sup> Fraction of non-canonical sites with respect to the total in a certain organism.

**Supplementary Table S12.** Counts of oomycetes sequences containing single or multiple RxLR occurrences within the RxLR-like set in addition to the signal peptide and the EER occurrence within 150 residues.

|                                              | RxLR | RxLK | KxLR | KxLK | QxLR | QxLK | TOT        | ALT/TOT <sup>a</sup> |
|----------------------------------------------|------|------|------|------|------|------|------------|----------------------|
| RxLR-like motif has unique occurrence        | 553  | 62   | 24   | 28   | 33   | 4    | <b>704</b> | <b>0.21</b>          |
| Most N-terminal when there are more variants | 315  | 35   | 31   | 26   | 16   | 13   | <b>436</b> | <b>0.28</b>          |

<sup>a</sup> Fraction of non-canonical sites with respect to the total in a certain organism.

**Supplementary Table S13.** Output of the SVM classification: number of CRN proteins per genome and number of CRN proteins also predicted to be secreted.

| Species <sup>a</sup> | # CRN <sup>b</sup> | # CRN+S <sup>c</sup> | P <sup>d</sup> |
|----------------------|--------------------|----------------------|----------------|
| PVIT                 | 40                 | 5                    | 3.06E-03       |
| ALA                  | 2                  | 0                    | -              |
| HARA                 | 23                 | 8                    | 1.01E-05       |
| PHYCA                | 64                 | 14                   | 8.01E-05       |
| PHYCI                | 13                 | 2                    | 8.15E-02       |
| PHYIN                | 260                | 48                   | 7.62E-05       |
| PHYRA                | 21                 | 5                    | 2.97E-02       |
| PHYSO                | 68                 | 10                   | 4.61E-02       |
| PAG1                 | 5                  | 1                    | 6.50E-02       |
| PAR                  | 4                  | 0                    | -              |
| PIR                  | 2                  | 1                    | 7.18E-03       |
| PIW                  | 2                  | 1                    | 6.36E-03       |
| PUG3                 | 4                  | 0                    | -              |
| PVE                  | 3                  | 0                    | -              |

<sup>a</sup>PVIT: *Plasmopara viticola*, ALA: *Albugo laibachii*, HARA: *Hyaloperonospora arabidopsidis*, PHYCA: *Phytophthora capsici*, PHYCI: *Phytophthora cinnamomi*, PHYIN: *Phytophthora infestans*, PHYRA: *Phytophthora ramorum*, PHYSO: *Phytophthora sojae*, PAG1: *Pythium aphanidermatum*, PAR: *Pythium arrhenomanes*, PIR: *Pythium irregulare*, PIW: *Pythium iwayamai*, PUG3: *Pythium ultimum*, PVE: *Pythium vexans*.

<sup>b</sup>The CRN classification is performed without using the information about the presence of the signal peptide.

<sup>c</sup>S, proteins with signal-peptide predicted by SignalP.

<sup>d</sup>The **P** column is the probability of random sampling as many secreted sequences. The probability is calculated using the binomial cumulative distribution function with the number of trials equal to the number of proteins predicted to be CRN, number of successes the number of CRN proteins also having a signal peptide, and the probability of success in the null hypothesis given by the number of proteins predicted as being secreted over the total number of genes.

**Supplementary Table S14.** CRN proteins identified by scanning protein sequences with regular expression.

| Species <sup>a</sup> | # L <sup>b</sup> | # L+V <sup>c</sup> | # S+L <sup>d</sup> | # S+L+V | P <sup>e</sup> |
|----------------------|------------------|--------------------|--------------------|---------|----------------|
| PVIT                 | 45               | 7                  | 5                  | 1       | 5.56E-03       |
| ALA                  | 6                | 2                  | 0                  | 0       | na             |
| HARA                 | 20               | 0                  | 11                 | 0       | 6.93E-10       |
| PHYIN                | 155              | 76                 | 41                 | 20      | 1.27E-08       |
| PHYCA                | 71               | 24                 | 15                 | 6       | 7.78E-05       |
| PHYCI                | 11               | 4                  | 2                  | 1       | 5.30E-02       |
| PHYRA                | 15               | 6                  | 2                  | 0       | 2.54E-01       |
| PHYSO                | 84               | 43                 | 13                 | 7       | 2.12E-02       |
| PAG1                 | 8                | 0                  | 1                  | 0       | 1.53E-01       |
| PAR                  | 8                | 0                  | 1                  | 0       | 1.10E-01       |
| PIR                  | 2                | 0                  | 0                  | 0       | na             |
| PIW                  | 5                | 0                  | 0                  | 0       | na             |
| PUG3                 | 6                | 1                  | 0                  | 0       | na             |
| PVE                  | 3                | 0                  | 0                  | 0       | na             |

<sup>a</sup>PVIT: *Plasmopara viticola*, ALA: *Albugo laibachii*, HARA: *Hyaloperonospora arabidopsidis*, PHYIN: *Phytophthora infestans*, PHYCA: *Phytophthora capsici*, PHYCI: *Phytophthora cinnamomi*, PHYRA: *Phytophthora ramorum*, PHYSO: *Phytophthora sojae*, PAG1: *Pythium aphanidermatum*, PAR: *Pythium arrhenomanes*, PIR: *Pythium irregulare*, PIW: *Pythium iwayamai*, PUG3: *Pythium ultimum*, PVE: *Pythium vexans*.

<sup>b</sup>L=LFLAK motif

<sup>c</sup>V=VVP motif,

<sup>d</sup>S, proteins with signal-peptide predicted by SignalP.

<sup>e</sup>The P column contains the p-value of the enrichment in secreted proteins in the group of proteins with a LFLAK motif. All counts refer to LFLAK motifs with occurrence p-value $\leq$ 0.05.

**Supplementary Table S15.** YxSLK were assigned by scanning protein sequences using the regular expression Y[A-Z][ST][LV][KR].

| Species <sup>a</sup> | # YxSLK occurrences <sup>b</sup> | # YxSLK Secreted <sup>c</sup> | Enrichment in Secreted <sup>d</sup> |
|----------------------|----------------------------------|-------------------------------|-------------------------------------|
| PVIT                 | 308 (194)                        | 25 (13)                       | <b>7.48E-05</b>                     |
| ALA                  | 153 (86)                         | 9 (4)                         | 2.06E-01                            |
| HARA                 | 164 (75)                         | 14 (9)                        | 1.45E-01                            |
| PHYCA                | 291 (153)                        | 45 (30)                       | <b>2.65E-06</b>                     |
| PHYCI                | 315 (168)                        | 36 (22)                       | <b>1.42E-02</b>                     |
| PHYSO                | 450 (261)                        | 61 (33)                       | <b>1.02E-03</b>                     |
| PHYIN                | 297 (146)                        | 43 (21)                       | <b>1.87E-02</b>                     |
| PHYRA                | 263 (131)                        | 46 (35)                       | <b>2.24E-03</b>                     |
| PIR                  | 216 (86)                         | 39 (26)                       | <b>2.32E-06</b>                     |
| PUG3                 | 180 (90)                         | 18 (10)                       | <b>7.16E-03</b>                     |
| PIW                  | 217 (89)                         | 27 (18)                       | <b>8.14E-03</b>                     |
| PAG1                 | 182 (75)                         | 31 (13)                       | <b>1.34E-04</b>                     |
| PVE                  | 180 (76)                         | 25 (14)                       | <b>5.01E-03</b>                     |
| PAR                  | 231 (108)                        | 26 (15)                       | <b>9.73E-03</b>                     |

<sup>a</sup>PVIT: *Plasmopara viticola*, ALA: *Albugo laibachii*, HARA: *Hyaloperonospora arabidopsidis*, PHYCA: *Phytophthora capsici*, PHYCI: *Phytophthora cinnamomi*, PHYSO: *Phytophthora sojae*, PHYIN: *Phytophthora infestans*, PHYRA: *Phytophthora ramorum*, PIR: *Pythium irregulare*, PUG3: *Pythium ultimum*, PIW: *Pythium iwayamai*, PAG1: *Pythium aphanidermatum*, PVE: *Pythium vexans*, PAR: *Pythium arrhenomanes*.

<sup>b</sup>The numbers in parenthesis indicate the number of YxSLK occurrences within 100 residues from the translation start site of the protein.

<sup>c</sup>The term Secreted corresponds to proteins for which SignalP<sup>39</sup> predicted a signal peptide.

<sup>d</sup>The p-value indicating if and in what degree the YxSLK group from an organism is enriched in secreted proteins. *P. viticola* has the largest number of members of this class among the biotrophs, comparable to the *Pythium* species, but much lower than *Phytophthora* species.

**Supplementary Table S16.** Pfam models used to define families of apoplastic effectors. For all models, for inclusion, we used a threshold of 1E-06 on the “e-value seq” field in the HMMER output.

| Class                      | Pfam name      | Pfam model ID |
|----------------------------|----------------|---------------|
| Cystatins                  | Cystatin       | PF00031       |
|                            | Elicitin       | PF00964       |
| Serine protease inhibitor  | Kazal_1        | PF00050       |
|                            | Kazal_2        | PF07648       |
| Necrosis inducing proteins | NPP1           | PF05630       |
|                            | PAN_1          | PF00024       |
| CBEL                       | PAN_4          | PF14295       |
|                            | PcF            | PF09461       |
|                            | Transglut_C    | PF00927       |
| Transglutaminase           | Transglut_core | PF01841       |
|                            | Transglut_N    | PF00868       |
| Glucanase inhibitor        | Trypsin        | PF00089       |

**Supplementary Table S17:** Number of read pairs (in millions) obtained in the different libraries and mapping on *P. viticola* and *V. vinifera* genomes.

|                                              | Non-infected (hpi) |      |      |      |      |      | Infected (hpi) |      |      |      |      | Pooled libraries |              |               |
|----------------------------------------------|--------------------|------|------|------|------|------|----------------|------|------|------|------|------------------|--------------|---------------|
|                                              | 0                  | 24   | 48   | 72   | 96   | 168  | 24             | 48   | 72   | 96   | 168  | Non-infected (C) | Infected (I) | Sporangia (S) |
| Total in RNaseq library                      | 63.9               | 81.4 | 74.3 | 91.6 | 86.8 | 84.8 | 80.3           | 97.6 | 81.1 | 97.9 | 86.6 | 30.5             | 20.5         | 23.5          |
| Mapping on <i>Plasmopara viticola</i> genome | -                  | -    | -    | -    | -    | -    | -              | 1.2  | 2.0  | 6.8  | 8.9  | -                | 0.7          | 11.6          |
| Mapping on <i>Vitis vinifera</i> genome      | 48.4               | 62.7 | 30.6 | 68.5 | 65.4 | 64.3 | 62.3           | 63.1 | 59.7 | 67.8 | 56.9 | 14.6             | 12.9         | 0.1           |

**Supplementary Table S18.** See attached Excel file “*P. viticola* differentially expressed genes during infection”.

**Supplementary Table S19.** *Plasmopara viticola* cellular processes enriched genes detected as having gene expression significantly different from 0 at 24 and 48 hpi.

| GO term <sup>a</sup> | Term                                            | #q  | #ref | p       | FDR     |
|----------------------|-------------------------------------------------|-----|------|---------|---------|
| <b>At 24 hpi</b>     |                                                 |     |      |         |         |
| 0009058              | bios. p.                                        | 71  | 2549 | 1.9E-08 | 2.9E-06 |
| 0016051              | carbohydrate bios. p.                           | 6   | 102  | 1.7E-03 | 4.2E-02 |
| 0019752              | carboxylic acid metabolic p.                    | 17  | 470  | 1.3E-04 | 5.6E-03 |
| 0006519              | cell. amino acid and derivative metabolic p.    | 12  | 356  | 2.0E-03 | 4.7E-02 |
| 0044249              | cell. bios. p.                                  | 70  | 2445 | 8.6E-09 | 2.4E-06 |
| 0034637              | cell. carbohydrate bios. p.                     | 6   | 91   | 9.7E-04 | 2.5E-02 |
| 0006073              | cell. glucan metabolic p.                       | 5   | 39   | 1.2E-04 | 5.6E-03 |
| 0042180              | cell. ketone metabolic p.                       | 17  | 481  | 1.7E-04 | 6.5E-03 |
| 0034645              | cell. macromolecule bios. p.                    | 55  | 1864 | 7.3E-08 | 8.6E-06 |
| 0033692              | cell. polysaccharide bios. p.                   | 5   | 49   | 3.5E-04 | 1.2E-02 |
| 0044264              | cell. polysaccharide metabolic p.               | 5   | 52   | 4.6E-04 | 1.4E-02 |
| 0044267              | cell. protein metabolic p.                      | 63  | 2163 | 1.9E-08 | 2.9E-06 |
| 0006631              | fatty acid metabolic p.                         | 5   | 62   | 1.0E-03 | 2.6E-02 |
| 0010467              | gene expression                                 | 50  | 1327 | 1.5E-10 | 6.2E-08 |
| 0009250              | glucan bios. p.                                 | 5   | 39   | 1.2E-04 | 5.6E-03 |
| 0044042              | glucan metabolic p.                             | 6   | 59   | 9.2E-05 | 5.4E-03 |
| 0009059              | macromolecule bios. p.                          | 57  | 1883 | 2.1E-08 | 2.9E-06 |
| 0006082              | organic acid metabolic p.                       | 17  | 472  | 1.4E-04 | 5.6E-03 |
| 0043436              | oxoacid metabolic p.                            | 17  | 470  | 1.3E-04 | 5.6E-03 |
| 0000271              | polysaccharide bios. p.                         | 5   | 58   | 7.6E-04 | 2.0E-02 |
| 0010608              | Posttranscr. Reg. of gene expression            | 6   | 79   | 4.6E-04 | 1.4E-02 |
| 0019538              | protein metabolic p.                            | 69  | 2709 | 5.3E-07 | 4.9E-05 |
| 0006164              | purine nucleotide bios. p.                      | 6   | 81   | 5.2E-04 | 1.5E-02 |
| 0009152              | purine ribonucleotide bios. p.                  | 6   | 78   | 4.3E-04 | 1.4E-02 |
| 0032268              | Reg. of cell. protein metabolic p.              | 8   | 134  | 2.9E-04 | 1.1E-02 |
| 0051246              | Reg. of protein metabolic p.                    | 8   | 149  | 5.9E-04 | 1.7E-02 |
| 0006417              | Reg. of translation                             | 6   | 66   | 1.7E-04 | 6.5E-03 |
| 0046686              | resp. to cadmium ion                            | 6   | 25   | 5.2E-07 | 4.9E-05 |
| 0010035              | resp. to inorganic substance                    | 7   | 40   | 5.9E-07 | 4.9E-05 |
| 0010038              | resp. to metal ion                              | 6   | 30   | 1.7E-06 | 1.1E-04 |
| 0050896              | resp. to stimulus                               | 24  | 758  | 5.8E-05 | 3.7E-03 |
| 0006950              | resp. to stress                                 | 19  | 552  | 1.1E-04 | 5.6E-03 |
| 0009260              | ribonucleotide bios. p.                         | 6   | 86   | 7.2E-04 | 2.0E-02 |
| 0006412              | translation                                     | 45  | 418  | 3.7E-26 | 3.0E-23 |
| 0006414              | translational elongation                        | 9   | 82   | 9.4E-07 | 7.0E-05 |
| <b>At 48 hpi</b>     |                                                 |     |      |         |         |
| 0065007              | biological reg.                                 | 329 | 1592 | 3.7E-12 | 9.4E-11 |
| 0009058              | biosynthetic proc.                              | 527 | 2549 | 2.0E-17 | 1.5E-15 |
| 0005975              | carbohydrate metabolic proc.                    | 114 | 552  | 1.6E-05 | 1.6E-04 |
| 0009056              | catabolic proc.                                 | 278 | 1225 | 2.9E-15 | 1.4E-13 |
| 0030154              | cell differentiation                            | 51  | 172  | 1.0E-07 | 1.3E-06 |
| 0006519              | cell. amino acid and derivative metabolic proc. | 113 | 356  | 2.8E-17 | 1.8E-15 |
| 0044249              | cell. biosynthetic proc.                        | 513 | 2445 | 3.2E-18 | 3.0E-16 |
| 0016043              | cell. component organization                    | 211 | 904  | 2.1E-13 | 7.8E-12 |
| 0019725              | cell. homeostasis                               | 35  | 100  | 1.2E-07 | 1.4E-06 |
| 0034645              | cell. macromolecule biosynthetic proc.          | 358 | 1864 | 3.0E-09 | 4.2E-08 |
| 0044267              | cell. protein metabolic proc.                   | 472 | 2163 | 4.3E-20 | 5.4E-18 |
| 0051234              | establishment of localization                   | 258 | 1461 | 1.0E-04 | 9.3E-04 |
| 0045184              | establishment of protein localization           | 102 | 362  | 3.2E-12 | 9.2E-11 |
| 0010467              | gene expression                                 | 395 | 1327 | 6.9E-45 | 1.3E-42 |
| 0006091              | generation of precursor metabolites and energy  | 38  | 107  | 2.2E-08 | 3.0E-07 |
| 0042592              | homeostatic proc.                               | 41  | 134  | 6.8E-07 | 7.4E-06 |
| 0051179              | localization                                    | 270 | 1556 | 2.2E-04 | 1.9E-03 |
| 0009059              | macromolecule biosynthetic proc.                | 362 | 1883 | 2.3E-09 | 3.3E-08 |
| 0033036              | macromolecule localization                      | 123 | 476  | 1.5E-11 | 3.4E-10 |
| 0006996              | organelle organization                          | 135 | 526  | 2.9E-12 | 9.0E-11 |
| 0008104              | protein localization                            | 111 | 407  | 3.8E-12 | 9.4E-11 |
| 0019538              | protein metabolic proc.                         | 553 | 2709 | 4.7E-17 | 2.5E-15 |
| 0015031              | protein transport                               | 102 | 361  | 2.7E-12 | 9.0E-11 |
| 0050789              | reg. of biological proc.                        | 297 | 1461 | 1.7E-10 | 3.1E-09 |
| 0065008              | reg. of biological quality                      | 82  | 279  | 3.6E-11 | 7.5E-10 |
| 0032535              | reg. of cell. component size                    | 18  | 59   | 8.6E-04 | 7.1E-03 |
| 0050794              | reg. of cell. proc.                             | 278 | 1384 | 1.8E-09 | 2.7E-08 |
| 0010468              | reg. of gene expression                         | 123 | 501  | 4.6E-10 | 7.5E-09 |
| 0040029              | reg. of gene expression, epigenetic             | 8   | 17   | 1.1E-03 | 8.6E-03 |
| 0060255              | reg. of macromolecule metabolic proc.           | 143 | 595  | 1.1E-10 | 2.0E-09 |
| 0019222              | reg. of metabolic proc.                         | 160 | 671  | 1.9E-11 | 4.2E-10 |
| 0009628              | resp. to abiotic stimulus                       | 53  | 176  | 3.4E-08 | 4.3E-07 |
| 0009719              | resp. to endogenous stimulus                    | 23  | 74   | 1.3E-04 | 1.2E-03 |
| 0009605              | resp. to external stimulus                      | 29  | 93   | 1.8E-05 | 1.7E-04 |
| 0050896              | resp. to stimulus                               | 171 | 758  | 4.0E-10 | 6.8E-09 |
| 0006950              | resp. to stress                                 | 119 | 552  | 1.4E-06 | 1.4E-05 |
| 0006350              | transcription                                   | 109 | 514  | 7.5E-06 | 7.6E-05 |
| 0006412              | translation                                     | 195 | 418  | 1.1E-55 | 4.2E-53 |
| 0006810              | transport                                       | 257 | 1456 | 1.1E-04 | 9.6E-04 |

<sup>a</sup>GO annotation is available for 173 of these genes and a total of 14,816 genes in the proteome. The latter was used as the reference annotation in the analysis. Abbreviations: cell.=cellular; p.=process; resp.=response; bios.=biosynthesis; Posttranscr.=posttranscriptional.

**Supplementary Table S20.** Gene Ontology (GO) annotation of RxLR-like genes expressed at 24 hpi.

| GO term | Ontology | Description                                                     | #q | #ref | p       | FDR     |
|---------|----------|-----------------------------------------------------------------|----|------|---------|---------|
| 0030554 | F        | adenyl nucleotide binding                                       | 23 | 1909 | 5.2E-05 | 5.5E-04 |
| 0032559 | F        | adenyl ribonucleotide binding                                   | 21 | 1809 | 1.5E-04 | 1.2E-03 |
| 0005524 | F        | ATP binding                                                     | 21 | 1787 | 1.3E-04 | 1.1E-03 |
| 0016798 | F        | hydrolase activity, acting on glycosyl bonds                    | 6  | 215  | 4.0E-04 | 2.8E-03 |
| 0004553 | F        | hydrolase activity, hydrolyzing O-glycosyl compounds            | 6  | 208  | 3.4E-04 | 2.5E-03 |
| 0016301 | F        | kinase activity                                                 | 19 | 831  | 3.1E-08 | 1.1E-06 |
| 0001882 | F        | nucleoside binding                                              | 23 | 1916 | 5.5E-05 | 5.5E-04 |
| 0000166 | F        | nucleotide binding                                              | 28 | 2422 | 2.4E-05 | 3.8E-04 |
| 0016773 | F        | phosphotransferase activity, alcohol group as acceptor          | 19 | 678  | 1.3E-09 | 7.2E-08 |
| 0004672 | F        | protein kinase activity                                         | 17 | 530  | 1.1E-09 | 7.2E-08 |
| 0004674 | F        | protein serine/threonine kinase activity                        | 13 | 394  | 5.4E-08 | 1.5E-06 |
| 0001883 | F        | purine nucleoside binding                                       | 23 | 1912 | 5.3E-05 | 5.5E-04 |
| 0017076 | F        | purine nucleotide binding                                       | 27 | 2169 | 9.6E-06 | 2.1E-04 |
| 0032555 | F        | purine ribonucleotide binding                                   | 25 | 2069 | 2.8E-05 | 3.8E-04 |
| 0032553 | F        | ribonucleotide binding                                          | 25 | 2069 | 2.8E-05 | 3.8E-04 |
| 0016740 | F        | transferase activity                                            | 24 | 2530 | 9.3E-04 | 5.7E-03 |
| 0016746 | F        | transferase activity, transferring acyl groups                  | 7  | 312  | 5.1E-04 | 3.3E-03 |
| 0016772 | F        | transferase activity, transferring phosphorus-containing groups | 20 | 1630 | 1.1E-04 | 9.6E-04 |
| 0043412 | P        | macromolecule modification                                      | 21 | 1578 | 2.6E-05 | 6.7E-04 |
| 0006796 | P        | phosphate metabolic process                                     | 22 | 1402 | 1.6E-06 | 7.3E-05 |
| 0006793 | P        | phosphorus metabolic process                                    | 22 | 1402 | 1.6E-06 | 7.3E-05 |
| 0016310 | P        | phosphorylation                                                 | 21 | 1125 | 1.9E-07 | 1.7E-05 |
| 0043687 | P        | post-translational protein modification                         | 20 | 1295 | 5.1E-06 | 1.9E-04 |
| 0006468 | P        | protein amino acid phosphorylation                              | 19 | 748  | 6.1E-09 | 1.1E-06 |
| 0006464 | P        | protein modification process                                    | 20 | 1434 | 2.0E-05 | 6.1E-04 |



**Supplementary Table S21:** Gene Ontology (GO) categories enrichment of differentially expressed genes (DEGs) in *Plasmopara viticola*

| GO term | GO | Description                                                    | #   | in | #    | in | p-value | FDR     |
|---------|----|----------------------------------------------------------------|-----|----|------|----|---------|---------|
| 0016043 | P  | cellular component organization                                | 95  |    | 886  |    | 5.7E-10 | 1.7E-07 |
| 0048869 |    | cellular developmental process                                 | 40  |    | 269  |    | 6.8E-09 | 1.0E-06 |
| 0009653 |    | anatomical structure morphogenesis                             | 33  |    | 209  |    | 2.9E-08 | 2.9E-06 |
| 0032502 |    | developmental process                                          | 59  |    | 510  |    | 4.6E-08 | 3.5E-06 |
| 0032501 |    | multicellular organismal process                               | 49  |    | 454  |    | 3.7E-06 | 2.1E-04 |
| 0009056 |    | catabolic process                                              | 101 |    | 1171 |    | 4.6E-06 | 2.1E-04 |
| 0048856 |    | anatomical structure development                               | 45  |    | 408  |    | 4.9E-06 | 2.1E-04 |
| 0003774 | F  | motor activity                                                 | 39  |    | 241  |    | 9.2E-10 | 1.8E-07 |
| 0016818 |    | hydrolase activity, acting on acid anhydrides, in P-containing | 91  |    | 950  |    | 1.9E-07 | 9.4E-06 |
| 0016462 |    | pyrophosphatase activity                                       | 91  |    | 949  |    | 1.8E-07 | 9.4E-06 |
| 0017111 |    | nucleoside-triphosphatase activity                             | 87  |    | 932  |    | 9.1E-07 | 3.6E-05 |
| 0005730 | C  | nucleolus                                                      | 38  |    | 161  |    | 1.0E-14 | 2.2E-12 |
| 0043232 |    | intracellular non-membrane-bounded organelle                   | 123 |    | 1166 |    | 1.0E-11 | 7.3E-10 |
| 0043228 |    | non-membrane-bounded organelle                                 | 123 |    | 1166 |    | 1.0E-11 | 7.3E-10 |
| 0031974 |    | membrane-enclosed lumen                                        | 53  |    | 388  |    | 7.8E-10 | 4.2E-08 |
| 0043233 |    | organelle lumen                                                | 52  |    | 382  |    | 1.2E-09 | 4.4E-08 |
| 0070013 |    | intracellular organelle lumen                                  | 52  |    | 382  |    | 1.2E-09 | 4.4E-08 |
| 0031981 |    | nuclear lumen                                                  | 47  |    | 340  |    | 4.3E-09 | 1.3E-07 |
| 0015630 |    | microtubule cytoskeleton                                       | 50  |    | 415  |    | 1.2E-07 | 3.1E-06 |
| 0044422 |    | organelle part                                                 | 149 |    | 1748 |    | 1.3E-07 | 3.1E-06 |
| 0044430 |    | cytoskeletal part                                              | 57  |    | 512  |    | 2.6E-07 | 5.6E-06 |
| 0005856 |    | cytoskeleton                                                   | 63  |    | 597  |    | 4.4E-07 | 8.6E-06 |
| 0044446 |    | intracellular organelle part                                   | 142 |    | 1730 |    | 1.6E-06 | 2.8E-05 |
| 0005929 |    | cilium                                                         | 15  |    | 67   |    | 1.9E-06 | 3.1E-05 |
| 0042995 |    | cell projection                                                | 21  |    | 127  |    | 3.8E-06 | 5.8E-05 |
| 0030529 |    | ribonucleoprotein complex                                      | 43  |    | 397  |    | 1.2E-05 | 1.7E-04 |
| 0032991 |    | macromolecular complex                                         | 142 |    | 1868 |    | 5.2E-05 | 7.0E-04 |

**Supplementary Table S22.** FPKM values of *Plasmopara viticola* secreted genes differentially expressed during infection.

| <i>P. viticola</i><br>gene ID | 24 hpi      | 48 hpi      | 72 hpi      | 96 hpi      | 168 hpi      | Effector<br>family | Description                                      |
|-------------------------------|-------------|-------------|-------------|-------------|--------------|--------------------|--------------------------------------------------|
| PVITv1021061                  | 101.819     | 126.359     | 32,185      | 33,569      | 0.00         | RxLR-R             |                                                  |
| PVITv1001084                  | 618.71      | 337.70      | 954.19      | 200.19      | 232.07       | -                  |                                                  |
| PVITv1012062                  | 536.78      | 262.06      | 60.64       | 155.48      | 51.70        | -                  |                                                  |
| PVITv1035002                  | 236.86      | 74.22       | 633.26      | 520.49      | 467.85       | -                  |                                                  |
| PVITv1005727                  | 130.02      | 223.86      | 91.14       | 133.14      | 48.51        | -                  | elicitin-like INF6                               |
| PVITv1006535                  | 47.92       | 8.65        | 16.25       | 3.10        | 4.68         | -                  |                                                  |
| PVITv1030766                  | 46.47       | 54.22       | 199.26      | 234.34      | 301.00       | -                  | glycoside hydrolase, putative                    |
| PVITv1005799                  | 41.00       | 88.18       | 601.70      | 261.49      | 285.12       | -                  | glycoside hydrolase, putative                    |
| PVITv1003492                  | 39.74       | 153.92      | 91.42       | 114.16      | 35.26        | RxLR-R             |                                                  |
| PVITv1032354                  | 33.85       | 84.13       | 126.64      | 201.68      | 87.91        | -                  |                                                  |
| PVITv1020539                  | 32.32       | 46.15       | 201.11      | 165.66      | 229.49       | -                  | cysteine protease family C01A, putative          |
| PVITv1013162                  | 23.69       | 63.32       | 219.20      | 212.53      | 214.63       | -                  |                                                  |
| PVITv1006070                  | 21.86       | 26.69       | 12.44       | 25.82       | 8.95         | YXSLK              | conserved hypothetical protein                   |
| PVITv1022382                  | 21.02       | 70.73       | 29.57       | 54.19       | 26.26        | -                  | conserved hypothetical protein                   |
| PVITv1016618                  | 18.99       | 26.37       | 175.70      | 102.06      | 144.62       | -                  | callose synthase, putative                       |
| PVITv1019732                  | 18.85       | 1.45        | 1.51        | 116.40      | 101.73       | -                  | glycoside hydrolase, putative                    |
| PVITv1020466                  | 17.44       | 14.64       | 87.56       | 54.44       | 118.82       | -                  | cysteine protease family C01A, putative          |
| PVITv1030481                  | 15.23       | 0.00        | 97.44       | 53.96       | 82.34        | -                  | conserved hypothetical protein                   |
| PVITv1035979                  | 14.34       | 0.00        | 31.62       | 25.71       | 29.61        | -                  | protease inhibitor Epi7                          |
| PVITv1013878                  | 14.24       | 44.56       | 313.59      | 181.00      | 366.07       | -                  | conserved hypothetical protein                   |
| PVITv1004487                  | 11.86       | 0.00        | 81.84       | 30.47       | 91.65        | -                  | cutinase, putative                               |
| PVITv1022330                  | 10.05       | 48.95       | 470.29      | 427.00      | 567.39       | -                  | glucan 1,3-beta-glucosidase, putative            |
| PVITv1020375                  | 8.64        | 12.24       | 225.85      | 113.22      | 166.94       | -                  |                                                  |
| PVITv1036266                  | 7.55        | 7.16        | 6.42        | 12.72       | 4.35         | RxLR-H             |                                                  |
| <b>PVITv1008311</b>           | <b>4.60</b> | <b>0.00</b> | <b>9.98</b> | <b>9.83</b> | <b>17.82</b> | <b>RxLR-H</b>      |                                                  |
| PVITv1002158                  | 3.69        | 35.09       | 15.26       | 27.33       | 13.20        | -                  | 60S ribosomal export protein NMD3, putative      |
| PVITv1011616                  | 2.50        | 0.61        | 1.74        | 2.75        | 12.66        | -                  | phospholipid-transporting ATPase, putative       |
| PVITv1018231                  | 1.75        | 5.10        | 73.78       | 74.13       | 87.10        | -                  | mucin-like protein                               |
| PVITv1033458                  | 0.00        | 1.71        | 2.50        | 6.70        | 2.40         | -                  |                                                  |
| PVITv1017335                  | 0.00        | 0.00        | 3.37        | 1.27        | 12.90        | -                  |                                                  |
| PVITv1015244                  | 0.00        | 0.00        | 7.07        | 6.35        | 8.42         | -                  |                                                  |
| PVITv1025503                  | 0.00        | 0.00        | 7.83        | 5.72        | 8.43         | -                  | mucin-like protein                               |
| PVITv1020385                  | 0.00        | 5.10        | 3.51        | 10.72       | 4.09         | -                  |                                                  |
| PVITv1000022                  | 0.00        | 0.00        | 7.23        | 11.12       | 7.18         | -                  | glycoside hydrolase, putative                    |
| PVITv1021406                  | 0.00        | 0.00        | 17.34       | 2.12        | 8.35         | -                  | conserved hypothetical protein                   |
| PVITv1026328                  | 0.00        | 0.00        | 18.10       | 2.49        | 10.04        | -                  | sporangia induced conserved hypothetical protein |
| PVITv1005240                  | 0.00        | 1.58        | 22.18       | 0.87        | 7.06         | -                  | conserved hypothetical protein                   |
| PVITv1015025                  | 0.00        | 0.00        | 10.93       | 9.60        | 11.81        | -                  | uridine kinase                                   |
| PVITv1033929                  | 0.00        | 0.00        | 10.52       | 11.66       | 10.62        | -                  | conserved hypothetical protein                   |
| PVITv1016178                  | 0.00        | 0.00        | 19.35       | 14.39       | 5.56         | -                  |                                                  |
| PVITv1024386                  | 0.00        | 0.00        | 15.03       | 11.85       | 12.77        | -                  | conserved hypothetical protein                   |
| PVITv1015555                  | 0.00        | 19.19       | 7.39        | 10.74       | 3.43         | -                  | carbohydrate esterase, putative                  |
| PVITv1026360                  | 0.00        | 1.49        | 11.18       | 5.01        | 23.48        | -                  | endoglucanase, putative                          |
| PVITv1003147                  | 0.00        | 3.91        | 16.45       | 19.31       | 8.56         | -                  |                                                  |
| PVITv1002840                  | 0.00        | 7.27        | 29.48       | 4.63        | 11.48        | -                  | similar to sexually induced protein 3            |
| PVITv1002288                  | 0.00        | 0.00        | 0.00        | 29.95       | 32.95        | -                  | glycoside hydrolase, putative                    |
| PVITv1007968                  | 0.00        | 0.00        | 31.52       | 17.53       | 24.68        | -                  |                                                  |
| PVITv1024576                  | 0.00        | 0.00        | 37.19       | 7.00        | 42.04        | -                  | conserved hypothetical protein                   |
| PVITv1019683                  | 0.00        | 0.00        | 43.85       | 11.82       | 31.66        | -                  | conserved hypothetical protein                   |
| PVITv1016506                  | 0.00        | 0.00        | 34.36       | 23.75       | 30.23        | -                  | hypothetical protein                             |
| PVITv1037885                  | 0.00        | 45.59       | 13.42       | 23.53       | 5.96         | -                  | glucanase inhibitor protein, putative            |
| PVITv1003338                  | 0.00        | 14.82       | 16.33       | 46.63       | 17.81        | -                  |                                                  |
| PVITv1018548                  | 0.00        | 0.00        | 25.67       | 38.69       | 37.17        | -                  | glycoside hydrolase, putative                    |
| PVITv1025849                  | 0.00        | 7.56        | 26.81       | 19.77       | 52.61        | -                  |                                                  |
| PVITv1020618                  | 0.00        | 13.65       | 9.57        | 31.23       | 57.79        | -                  | glucan 1,3-beta-glucosidase, putative            |
| PVITv1037902                  | 0.00        | 0.00        | 61.82       | 12.63       | 40.07        | -                  | conserved hypothetical protein                   |
| PVITv1023922                  | 0.00        | 0.00        | 44.07       | 27.97       | 43.77        | -                  | methylmalonate semialdehyde dehydrogenase        |
| PVITv1029873                  | 0.00        | 3.48        | 3.09        | 54.12       | 56.27        | -                  | conserved hypothetical protein                   |
| PVITv1000935                  | 0.00        | 10.41       | 89.37       | 13.46       | 4.53         | -                  |                                                  |
| PVITv1007159                  | 0.00        | 0.00        | 74.51       | 13.62       | 46.73        | -                  | conserved hypothetical protein                   |
| PVITv1013252                  | 0.00        | 0.00        | 67.76       | 38.79       | 54.69        | -                  |                                                  |
| PVITv1001768                  | 0.00        | 33.00       | 21.99       | 13.79       | 93.67        | -                  |                                                  |
| PVITv1016009                  | 0.00        | 0.46        | 142.71      | 3.30        | 38.66        | -                  | conserved hypothetical protein                   |
| PVITv1029584                  | 0.00        | 58.71       | 34.38       | 79.22       | 24.92        | -                  |                                                  |
| PVITv1028723                  | 0.00        | 67.57       | 44.48       | 71.74       | 32.80        | -                  | conserved hypothetical protein                   |
| PVITv1010696                  | 0.00        | 0.00        | 74.37       | 91.87       | 61.87        | -                  | putative GPI-anchored serine rich elicitor       |
| PVITv1016027                  | 0.00        | 147.68      | 54.50       | 113.28      | 46.55        | -                  |                                                  |
| PVITv1017517                  | 0.00        | 15.88       | 182.99      | 84.50       | 126.75       | -                  | conserved hypothetical protein                   |
| PVITv1030765                  | 0.00        | 0.00        | 158.87      | 153.80      | 101.44       | -                  | carbohydrate-binding protein, putative           |
| PVITv1004978                  | 0.00        | 0.00        | 267.52      | 67.21       | 174.76       | -                  | conserved hypothetical protein                   |
| PVITv1027001                  | 0.00        | 16.18       | 471.71      | 67.34       | 130.09       | -                  |                                                  |

**Supplementary Table S23.** See attached Excel file “FPKM values of *P. viticola* secreted and non-secreted genes expressed during infection”.

**Supplementary Table S24.** Effectors tested by *Agrobacterium* infiltration assays.

| Effector gene ID | Symptoms on <i>V. vinifera</i> | Symptoms on <i>V. riparia</i> | Effector type         |
|------------------|--------------------------------|-------------------------------|-----------------------|
| PVITv1003209     | None                           | None                          | elicitin-like protein |
| PVITv1005727     | None                           | None                          | elicitin-like INF6    |
| PVITv1018092     | None                           | None                          | Elicitin              |
| PVITv1020941     | None                           | None                          | Crinkler              |
| PVITv1016922     | None                           | None                          | Crinkler              |
| PVITv1021061     | None                           | None                          | RxLR                  |
| PVITv1008294     | None                           | None                          | RxLR                  |
| PVITv1008311     | None                           | Hypersensitive response       | RxLR                  |

**Supplementary Table S25.** Similarity search of the RxLR effector PVITv1\_T008311 in the two other *P. viticola* genomes.

| Query                                                      | Subject                         | Identity | AlignLen | Qend | Sstart | E-value  |
|------------------------------------------------------------|---------------------------------|----------|----------|------|--------|----------|
| <b>PVITv1_T008311 vs INRA-PV221 (Dussert et al., 2016)</b> |                                 |          |          |      |        |          |
| PVITv1_T008311                                             | gi 1047461013 gb MBPM01000113.1 | 99.46    | 1308     | 1308 | 126397 | 0        |
| PVITv1_T008311                                             | gi 1047461013 gb MBPM01000113.1 | 76.97    | 330      | 325  | 169749 | 5.00E-44 |
| PVITv1_T008311                                             | gi 1047461013 gb MBPM01000113.1 | 78.87    | 265      | 271  | 133158 | 2.00E-42 |
| PVITv1_T008311                                             | gi 1047461013 gb MBPM01000113.1 | 78.47    | 274      | 280  | 139834 | 9.00E-42 |
| PVITv1_T008311                                             | gi 1047458994 gb MBPM01001806.1 | 99.85    | 689      | 1308 | 1      | 0        |
| <b>PVITv1_T008311 vs PvitFEM01 (this work)</b>             |                                 |          |          |      |        |          |
| PVITv1_T008311                                             | scaffold-5149                   | 100      | 1308     | 1308 | 8731   | 0        |
| PVITv1_T008311                                             | scaffold-5149                   | 78.87    | 265      | 271  | 1643   | 3E-42    |
| PVITv1_T008311                                             | scaffold-73                     | 76.97    | 330      | 325  | 8478   | 6E-44    |
| <b>PVITv1_T008311 vs JL-7-2 (Yin et al., 2017)</b>         |                                 |          |          |      |        |          |
| PVITv1_T008311                                             | MTPI01000176.1                  | 99.9     | 994      | 1308 | 38702  | 0        |
| PVITv1_T008311                                             | MTPI01000176.1                  | 100      | 173      | 226  | 39020  | 4E-86    |
| PVITv1_T008311                                             | MTPI01000176.1                  | 78.49    | 265      | 271  | 31922  | 2E-40    |
| PVITv1_T008311                                             | MTPI01000176.1                  | 100      | 37       | 292  | 38848  | 2E-10    |
| PVITv1_T008311                                             | MTPI01000890.1                  | 77.81    | 329      | 325  | 34110  | 7E-49    |

**Supplementary Table S26.** See attached Excel file “KEGG modules significantly enriched or lost in *P. viticola*”.

**Supplementary Table S27.** *P. infestans* KEGG orthologs in *P. viticola* isolates

| KEGG Module               | Pathway description                | <i>P. infestans</i><br>KEGG gene ID                                                                       | Blastn hits to find                                                                                       |                                                    |
|---------------------------|------------------------------------|-----------------------------------------------------------------------------------------------------------|-----------------------------------------------------------------------------------------------------------|----------------------------------------------------|
|                           |                                    |                                                                                                           | Orthologs in<br><i>P. viticola</i> INRA-PV221                                                             | Orthologs in <i>P.</i><br><i>viticola</i> JL-7-2   |
| M00531,M00615             | Nitrogen metabolism                | PITG_13013                                                                                                | None                                                                                                      | None                                               |
| M00176,M00616             | Sulphur assimilation               | PITG_19263,PITG_18187                                                                                     | None                                                                                                      | None                                               |
| M00027                    | GABA shunt                         | PITG_01909                                                                                                | None                                                                                                      | None                                               |
| M00028<br>(M00016,M00031) | Ornithine biosynthesis             | PITG_12053                                                                                                | None                                                                                                      | None                                               |
| M00036 (M00088)           | Leucine degradation                | PITG_00747                                                                                                | gi 1047460988 gb MBPM01000132.1                                                                           | MTPi01000061.1                                     |
| M00051                    | Uridine monophosphate biosynthesis | PITG_09635,PITG_09576                                                                                     | None                                                                                                      | None                                               |
| M00307                    | Pyruvate oxidation                 | PITG_03277, PITG_19161,<br>PITG_06108, PITG_11929,<br>PITG_00458,<br>PITG_15359,PITG_18935,<br>PITG_19802 | gi 1047460982 gb MBPM01000136.1 ,<br>gi 1047461157 gb MBPM01000003.1 ,<br>gi 1047461135 gb MBPM01000019.1 | MTPi01001062.1<br>MTPi01000086.1<br>MTPi01000266.1 |

**Supplementary Table S28.** See attached Excel file “FPKM values and GO term enrichment analysis of *Vitis vinifera* genes differentially expressed during infection”.

Supplementary Table S29. RNA silencing proteins encoded in *P. viticola* genome.

| Gene name         | Predicted protein                              | Protein domains                                                                                                                                                                                                                                                                                                                                                                                                                                             | Number of genes | <i>P. viticola</i> Gene ID                                                                                                 |
|-------------------|------------------------------------------------|-------------------------------------------------------------------------------------------------------------------------------------------------------------------------------------------------------------------------------------------------------------------------------------------------------------------------------------------------------------------------------------------------------------------------------------------------------------|-----------------|----------------------------------------------------------------------------------------------------------------------------|
| <b>PvRDR</b>      | RNA-dependent RNA polymerase                   | RdRP (pfam05183), Helicase_C (pfam00271), DEXDc (cd00046), SSL2 (COG1061)                                                                                                                                                                                                                                                                                                                                                                                   | 1               | PVITv1_T028224                                                                                                             |
| <b>PvAGO</b>      | Argonaute                                      | Piwi_ago-like (cd04657)<br>Piwi_ago-like (cd04657), ArgoN (pfam16486), PAZ_argonaute_like (cd02846), ArgoL1 (pfam08699), PLN03202 (PLN03202)                                                                                                                                                                                                                                                                                                                | 2               | PVITv1_T036365<br>PVITv1_T027285                                                                                           |
| <b>PvDRB</b>      | dsRNA-binding                                  | DSRM (cd00048), WW (smart00456)                                                                                                                                                                                                                                                                                                                                                                                                                             | 1               | PVITv1_T024270                                                                                                             |
| <b>PvHEL</b>      | RNA helicase                                   | DEADc (cd00268), HELICc (cd00079), DEXDc (smart00487)<br>DEADc (cd00268), DEXDc (smart00487)<br>P-loop_NTPase super family (cl21455), Helicase_C (pfam00271), SrmB (COG0513)<br>DEADc (cd00268), Helicase_C (pfam00271), SrmB (COG0513)<br>Helicase_C (pfam00271), SrmB (COG0513)<br>DEADc (cd00268), HELICc (cd00079), PTZ00424 (PTZ00424)<br>P-loop_NTPase super family (cl21455), HELICc (cd00079), cas3_core (TIGR01587)                                | 7               | PVITv1_T035436<br>PVITv1_T015528<br>PVITv1_T001847<br>PVITv1_T002627<br>PVITv1_T022767<br>PVITv1_T018212<br>PVITv1_T033892 |
| <b>PvHDAC</b>     | Histone deacetylase                            | Arginase_HDAC super family (cl17011), PTZ00063 (PTZ00063)<br>HDAC_classII_2 (cd11599)<br>Arginase_HDAC super family (cl17011)<br>Arginase_HDAC super family (cl17011)<br>Arginase_HDAC super family (cl17011), PTZ00063 (PTZ00063)                                                                                                                                                                                                                          | 5               | PVITv1_T026116<br>PVITv1_T019080<br>PVITv1_T034379<br>PVITv1_T028430<br>PVITv1_T007443                                     |
| <b>PvBRD</b>      | Bromodomain                                    | Bromodomain (cd04369), PHD_SF super family (cl22851)                                                                                                                                                                                                                                                                                                                                                                                                        | 1               | PVITv1_T006879                                                                                                             |
| <b>PvHMET</b>     | SET (Su(var)3-9, Enhancer-of-zeste, Trithorax) | SET (smart00317), FYRN (pfam05964), FYRC super family (cl02651)<br>SET (smart00317), AWS (smart00570), PostSET (smart00508)<br>SET (smart00317)<br>SET (smart00317), AWS (smart00570), PKc_like super family (cl21453), AWS (smart00570), RRM_SF super family (cl17169)<br>SET (smart00317), PHD2_NSD (cd15565), PHD3_NSD (cd15566), PHD_SF super family (cl22851)<br>SET (smart00317)<br>SET (smart00317), PHD_SF super family (cl22851), AWS (smart00570) | 7               | PVITv1_T027418<br>PVITv1_T002061<br>PVITv1_T031084<br>PVITv1_T003751<br>PVITv1_T019885<br>PVITv1_T031084<br>PVITv1_T014932 |
| <b>PvCRD</b>      | Chromodomain                                   | CHROMO (cd00024)<br>Chromo (pfam00385)<br>DEXDc (cd00046), Chromo (pfam00385), CHROMO (smart00298), DEXDc (smart00487)<br>Chromo (pfam00385)                                                                                                                                                                                                                                                                                                                | 4               | PVITv1_T029424<br>PVITv1_T008234<br>PVITv1_T037120<br>PVITv1_T015441                                                       |
| <b>PvRNaseIII</b> | Ribonuclease III                               | RIBOc (cd00593)                                                                                                                                                                                                                                                                                                                                                                                                                                             | 1               | PVITv1_T011751                                                                                                             |
| <b>PvDCL</b>      | Dicer-like                                     | Twice RIBOc (cd00593), Dicer_dimer super family (cl04028)<br>DEAD (pfam00270), HELICc (smart00490), Dicer_dimer super family (cl04028), MPH1 (COG1111)                                                                                                                                                                                                                                                                                                      | 2               | PVITv1_T038441<br>PVITv1_T003331                                                                                           |

**Supplementary Table S30.** Effector genes associated with sRNAs.

| Effector category <sup>a</sup> | N unique sRNAs | Total N reads | N genes | N genes with sRNAs | Genes                                                                                                                              |
|--------------------------------|----------------|---------------|---------|--------------------|------------------------------------------------------------------------------------------------------------------------------------|
| <b>RxLR</b>                    | 240            | 21,147        | 202     | 3                  | PVITv1_T021061, T000764, <b>T024389</b>                                                                                            |
| <b>Crinkler</b>                | 416            | 119,424       | 285     | 13                 | PVITv1_T028898, T016878, T035967, T025173, T003247, T030506, T020941, T020942, T012549, <b>T024389</b> , T002897, T004916, T004903 |
| <b>YxSLK</b>                   | 8              | 200           | 308     | 5                  | PVITv1_T006273, T006256, T005164, T012793, T010063                                                                                 |

<sup>a</sup>26 genes containing sRNAs mapping perfectly and uniquely on effector. For the RxLR the following variants were considered: RxLR+EER, SignalPeptide+RxLR+EER, SignalPeptide +RxLR-like(homology). For the CRN-like the following variants were considered: LFLAK+VVP, SignalPeptide +LFLAK, SVM. In particular, PVITv1\_T024389 is present in both the CRN (it contains the LFLAK) and the RxLR (by homology) lists, and appeared to be a strong sRNA producer.

**Supplementary Table S31.** See attached Excel file “Degradome analysis of *V. vinifera* genes targeted by *V. vinifera* sRNAs”.

**Supplementary Table S32.** See attached Excel file “Degradome analysis of *P. viticola* genes targeted by *P. viticola* sRNAs”.

**Supplementary Table S33.** See attached Excel file “Degradome analysis of *V. vinifera* genes targeted by *P. viticola* sRNAs”.

**Supplementary Table S34.** See attached Excel file “Degradome analysis of *P. viticola* genes targeted by *V. vinifera* sRNAs”.

Supplementary Table S35. Oligonucleotide sequences.

| Name                          | Sequence (5'-3')                 | Purpose                          |
|-------------------------------|----------------------------------|----------------------------------|
| F_PVITv1T003209_+sp_CACC      | CACCATGGCAAACCTTTTCGTTGT         | Agroinfiltration Elicitin        |
| F_PVITv1T003209_Dp_CACC       | CACCATGCACGACGGAGACGATGAC        | "                                |
| R_PVITv1T003209               | TTACGCTAGGATAGCGGC               | "                                |
| F_PVITv1T005727_+sp_CACC      | CACCATGAATCTATGCTTGACCATCG       | Agroinfiltration Elicitin        |
| F_PVITv1T005727_Dp_CACC       | CACCATGAACGATTGTTCAGCAATTCAG     | "                                |
| R_PVITv1T005727               | TTAATCAGCACCACGAAAATTG           | "                                |
| F_PVITv1T018092_+sp_CACC      | CACCATGAACATCTTCTACGCTGTC        | Agroinfiltration Elicitin        |
| F_PVITv1T018092_Dp_CACC       | CACCATGGAACCTTGCCCTCAAGATG       | "                                |
| R_PVITv1T018092               | TCAAAAGCTACGAAAAGAGTATG          | "                                |
| F_PVITv1T020941               | CACCATGAAGGACGCGATTGC            | Agroinfiltration Crinkler        |
| R_PVITv1T020941               | TCAAGTGACGGTTGAC                 | "                                |
| F_PVITv1T016922               | CACCATGATAGTAATGTGTGGTGAAGAAAAAG | Agroinfiltration Crinkler        |
| R_PVITv1T016922               | TCAGAGTGATTGCGTAAGCG             | "                                |
| F_PVITv1T021061_+sp_CACC      | CACCATGCAGCGCAAATGGC             | Agroinfiltration RxLR            |
| F_PVITv1T021061_Dp_CACC       | CACCATGCTGTGCTGTGGTG             | "                                |
| R_PVITv1T021061               | CTACTCGTCCACCAAGATATAAC          | "                                |
| F_PVITv1T008294_+sp_CACC      | CACCATGCGCGGAAGTACG              | Agroinfiltration RxLR            |
| F_PVITv1T008294_Dp_CACC       | CACCATGACTGCAATCGGAAAATCTCG      | "                                |
| R_PVITv1T008294               | CTAATTGCCGCCGCTC                 | "                                |
| F_RxLR_PVITv1T008311_+sp_CACC | CACCATGCGTGGTGCCTATTAC           | Agroinfiltration RxLR            |
| F_RxLR_PVITv1T008311_Dp_CACC  | CACCATGTCTGACCGTCAGCTCC          | "                                |
| R_RxLR_PVITv1T008311          | TTACAAAGCTTTGTCTAGTCC            | "                                |
| F_pSKMCS_CACC                 | CACCTAATACGACTCACTATAGGGC        | Agroinfiltration Empty vector    |
| R_pSKMCS                      | TGACCATGATTACGCCAAGC             | "                                |
| >FqRT_PVITv1T008311           | CGCCTCCAAAATTGAAGGTCG            | qRT-PCR RxLR_PVITv1T008311       |
| >RqRT_PVITv1T008311           | GTTGGAAGACTGATTGTGCCG            | "                                |
| F_qRTGFPpK7WG2D               | GACCACTACCAGCAGAACACC            | qRT-PCR GFP                      |
| R_qRTGFPpK7WG2D               | AGCTCGTCCTTCTTGTACAGC            |                                  |
| F_PveIF1b_PVITv1_T004162      | ACAACGGTGCAAGGCTTAGC             | qRT-PCR house-keeping gene eiF1b |
| R_PveIF1b_PVITv1_T004162      | ACTCGGAATGTTAGTCCGC              | "                                |

## SUPPLEMENTARY REFERENCES

1. Li, H. *et al.* The sequence alignment/map format and SAMtools. *Bioinformatics* **25**, 2078-2079 (2009).
2. Simpson, J.T. *et al.* ABySS: A parallel assembler for short read sequence data. *Genome Research* **19**, 1117-1123 (2009).
3. Stanke, M., Schöffmann, O., Morgenstern, B. & Waack, S. Gene prediction in eukaryotes with a generalized hidden Markov model that uses hints from external sources. *BMC Bioinformatics* **7**, 62 (2006).
4. Boisvert, S., Laviolette, F. & Corbeil, J. Ray: simultaneous assembly of reads from a mix of high-throughput sequencing technologies. *Journal of Computational Biology* **17**, 1519-1533 (2010).
5. Haas, B.J. *et al.* Genome sequence and analysis of the Irish potato famine pathogen *Phytophthora infestans*. *Nature* **461**, 393-398 (2009).
6. Keller, O., Odronitz, F., Stanke, M., Kollmar, M. & Waack, S. Scipio: Using protein sequences to determine the precise exon/intron structures of genes and their orthologs in closely related species. *BMC Bioinformatics* **9**, 278 (2008).
7. Slater, G.S.C. & Birney, E. Automated generation of heuristics for biological sequence comparison. *BMC Bioinformatics* **6**, 31 (2005).
8. Langmead, B. & Salzberg, S.L. Fast gapped-read alignment with Bowtie 2. *Nat Meth* **9**, 357-359 (2012).
9. Majoros, W.H., Pertea, M. & Salzberg, S.L. TigrScan and GlimmerHMM: two open source ab initio eukaryotic gene-finders. *Bioinformatics* **20**, 2878-2879 (2004).
10. Parra, G., Blanco, E. & Guigó, R. GenElD in Drosophila. *Genome Research* **10**, 511-515 (2000).
11. Moriya, Y., Itoh, M., Okuda, S., Yoshizawa, A.C. & Kanehisa, M. KAAS: an automatic genome annotation and pathway reconstruction server. *Nucleic Acids Research* **35**, W182-W185 (2007).
12. Falda, M. *et al.* Argot2: a large scale function prediction tool relying on semantic similarity of weighted Gene Ontology terms. *BMC Bioinformatics* **13**, S14 (2012).
13. Fontana, P., Cestaro, A., Velasco, R., Formentin, E. & Toppo, S. Rapid annotation of anonymous sequences from genome projects using semantic similarities and a weighting scheme in gene ontology. *PLoS ONE* **4**, e4619 (2009).
14. Remm, M., Storm, C.E.V. & Sonnhammer, E.L.L. Automatic clustering of orthologs and in-paralogs from pairwise species comparisons. *Journal of Molecular Biology* **314**, 1041-1052 (2001).
15. Trapnell, C. *et al.* Differential gene and transcript expression analysis of RNA-seq experiments with TopHat and Cufflinks. *Nat. Protocols* **7**, 562-578 (2012).
16. Lagesen, K. *et al.* RNAmmer: consistent and rapid annotation of ribosomal RNA genes. *Nucleic Acids Research* **35**, 3100-3108 (2007).



17. Lowe, T.M. & Eddy, S.R. tRNAscan-SE: A program for improved detection of transfer RNA genes in genomic sequence. *Nucleic Acids Research* **25**, 955-964 (1997).
18. Voglmayr, H. & Greilhuber, J. Genome size determination in Peronosporales (Oomycota) by Feulgen image analysis. *Fungal Genetics and Biology* **25**, 181-195 (1998).
19. Simão, F.A., Waterhouse, R.M., Ioannidis, P., Kriventseva, E.V. & Zdobnov, E.M. BUSCO: assessing genome assembly and annotation completeness with single-copy orthologs. *Bioinformatics* **31**, 3210-3212 (2015).
20. Alexeyenko, A., Tamas, I., Liu, G. & Sonnhammer, E.L.L. Automatic clustering of orthologs and inparalogs shared by multiple proteomes. *Bioinformatics* **22**, e9-15 (2006).
21. Katoh, K. & Standley, D.M. MAFFT multiple sequence alignment software version 7: improvements in performance and usability. *Molecular Biology and Evolution* **30**, 772-780 (2013).
22. Talavera, G. & Castresana, J. Improvement of phylogenies after removing divergent and ambiguously aligned blocks from protein sequence alignments. *Systematic Biology* **56**, 564-577 (2007).
23. Castresana, J. Selection of conserved blocks from multiple alignments for their use in phylogenetic analysis. *Molecular Biology and Evolution* **17**, 540-552 (2000).
24. Guindon, S. et al. New algorithms and methods to estimate maximum-likelihood phylogenies: assessing the performance of PhyML 3.0. *Systematic Biology* **59**, 307-321 (2010).
25. Stamatakis, A. RAxML version 8: a tool for phylogenetic analysis and post-analysis of large phylogenies. *Bioinformatics* **30**, 1312-1313 (2014).
26. Sharma, R. et al. Genome analyses of the sunflower pathogen *Plasmopara halstedii* provide insights into effector evolution in downy mildews and *Phytophthora*. *BMC Genomics* **16**, 741 (2015).
27. McCarthy, C.G.P. & Fitzpatrick, D.A. Phylogenomic reconstruction of the oomycete phylogeny derived from 37 genomes. *mSphere* **2**, e00095-17 (2017).
28. Tian, M. et al. 454 genome sequencing of *Pseudoperonospora cubensis* reveals effector proteins with a QXLR translocation motif. *Molecular Plant-Microbe Interactions* **24**, 543-553 (2011).
29. Lévesque, C.A. et al. Genome sequence of the necrotrophic plant pathogen *Pythium ultimum* reveals original pathogenicity mechanisms and effector repertoire. *Genome Biology* **11**, R73 (2010).
30. Bailey, T.L. & Elkan, C. Fitting a mixture model by expectation maximization to discover motifs in biopolymers. in *Proc Int Conf Intell Syst Mol Biol* Vol. 2 28-36 (1994).
31. Finn, R.D. et al. Pfam: the protein families database. *Nucleic Acids Research* **42**, D222-D230 (2014).

32. Eddy, S.R. Profile hidden Markov models. *Bioinformatics* **14**, 755-763 (1998).
33. Trapnell, C. *et al.* Transcript assembly and quantification by RNA-Seq reveals unannotated transcripts and isoform switching during cell differentiation. *Nat. Biotechnol.* **28**, 511-515 (2010).
34. Zottini, M. *et al.* Agroinfiltration of grapevine leaves for fast transient assays of gene expression and for long-term production of stable transformed cells. *Plant Cell Reports* **27**, 845-853 (2008).
35. Roetschi, A., Si-Ammour, A., Belbahri, L., Mauch, F. & Mauch-Mani, B. Characterization of an Arabidopsis-*Phytophthora* pathosystem: resistance requires a functional *PAD2* gene and is independent of salicylic acid, ethylene and jasmonic acid signalling. *The Plant Journal* **28**, 293-305 (2001).
36. Pfaffl, M.W. A new mathematical model for relative quantification in real-time RT-PCR. *Nucleic Acids Research* **29**, e45 (2001).
37. Takami, H. *et al.* An automated system for evaluation of the potential functionome: MAPLE version 2.1.0. *DNA Research* **23**, 467-475 (2016).
38. Zheng, Y., Li, Y.-F., Sunkar, R. & Zhang, W. SeqTar: an effective method for identifying microRNA guided cleavage sites from degradome of polyadenylated transcripts in plants. *Nucleic Acids Research* **40**, e28 (2011).
39. Petersen, T.N., Brunak, S., von Heijne, G. & Nielsen, H. SignalP 4.0: discriminating signal peptides from transmembrane regions. *Nat Meth* **8**, 785-786 (2011).
40. Boutemy, L.S. *et al.* Structures of *Phytophthora* RXLR effector proteins: a conserved but adaptable fold underpins functional diversity. *Journal of Biological Chemistry* **286**, 35834-35842 (2011).
41. Fahlgren, N. *et al.* *Phytophthora* have distinct endogenous small RNA populations that include short interfering and microRNAs. *PLoS ONE* **8**, e77181 (2013).
